# Supplementary material for: The Prognostic Significance and Potential Mechanism of Prolyl 3-Hydroxylase 1 in Hepatocellular Carcinoma
Source: Hindawi journal article supplement (doi:10.1155/2022/7854297), 2022-10-26
Supplement: f1 [file 7854297.f1.pdf]

**Figure S1** mRNA expression of the P3H1 gene. (A) P3H1 expression in men and women of normal tissue using GTEx data. (B) The expression of P3H1 in 38 kinds of cancer cell lines from the CCLE database. (\* $P < 0.05$ , \*\*\* $P < 0.001$ )

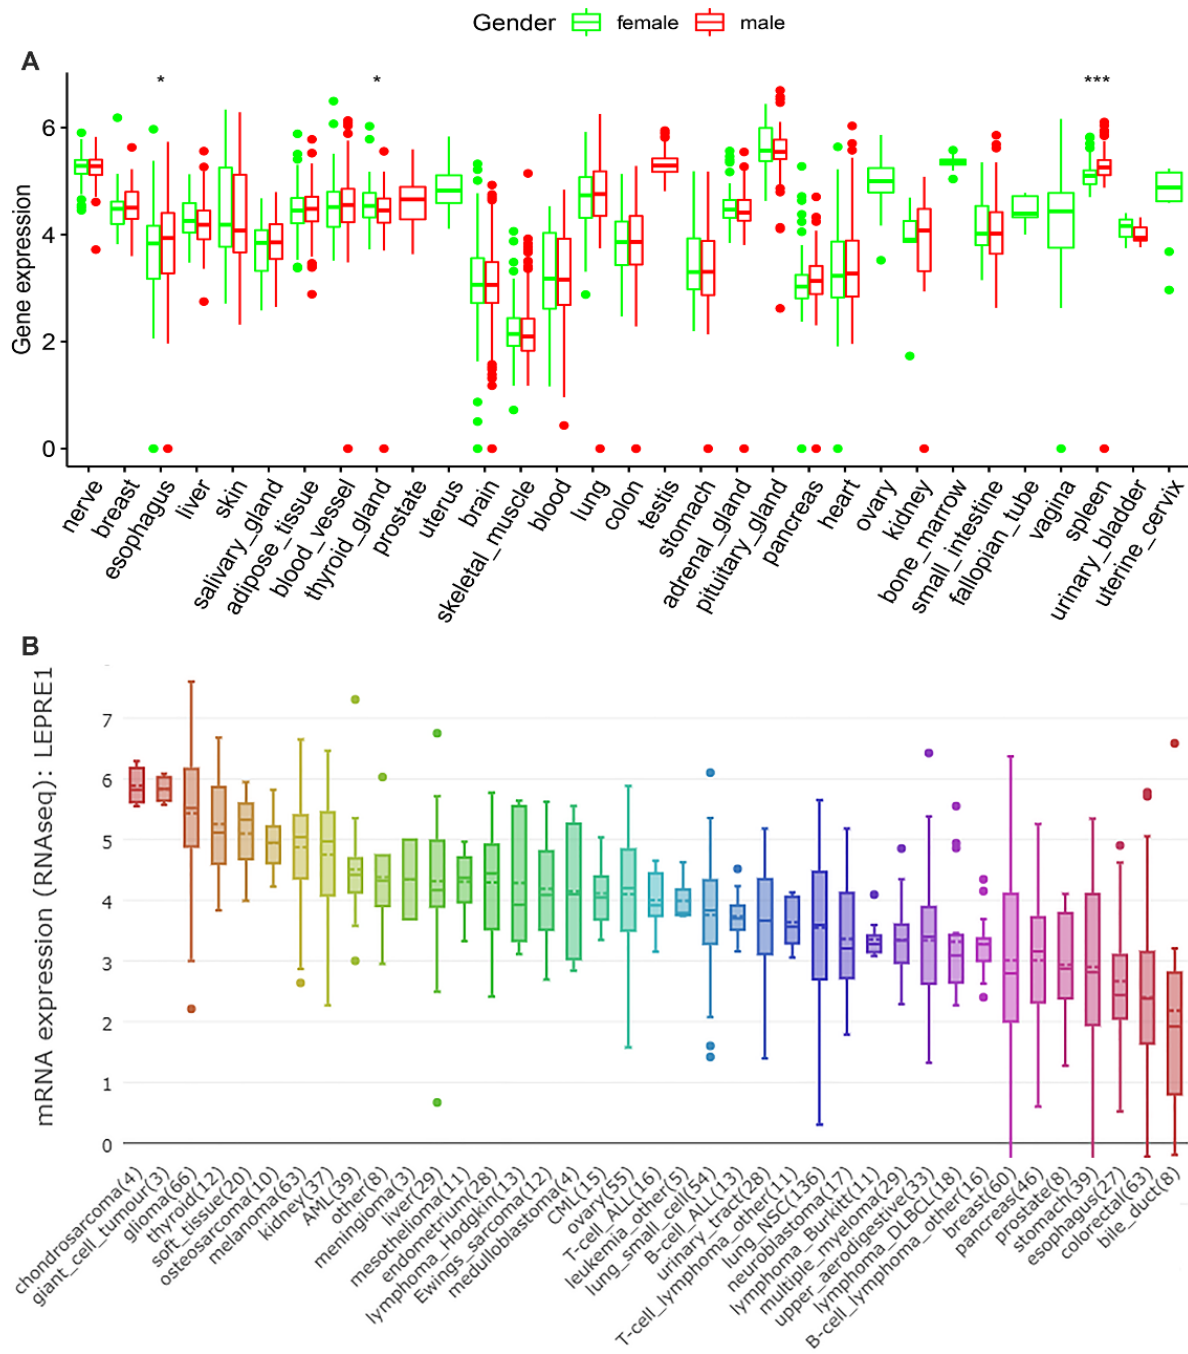

**Figure S2** P3H1 expression in cancer and normal tissues using the TCGA and GTEx dataset. (\* $P < 0.05$ , \*\*\* $P < 0.001$ )

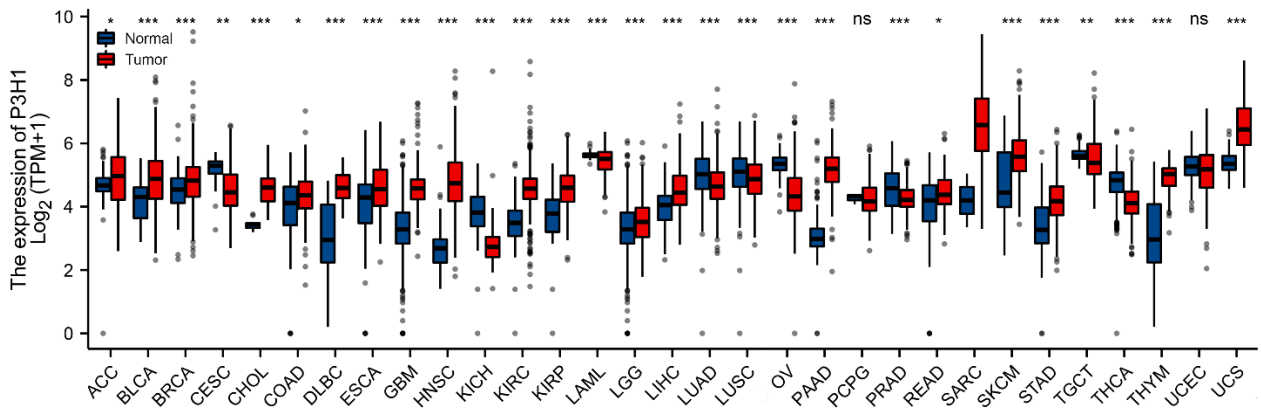

**Figure S3** The western blot method was utilized to assess the P3H1 level after transfection with lentivirus. (\*\* $P < 0.001$ )

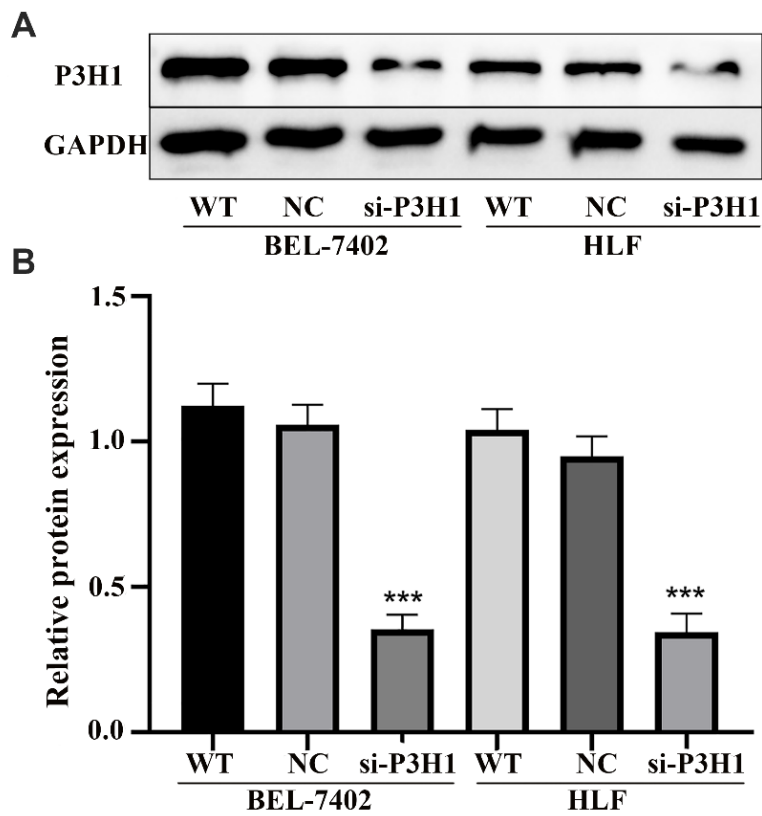

**Figure S4** Heatmap for variance analysis between patients with high P3H1 expression and those with low P3H1 expression.

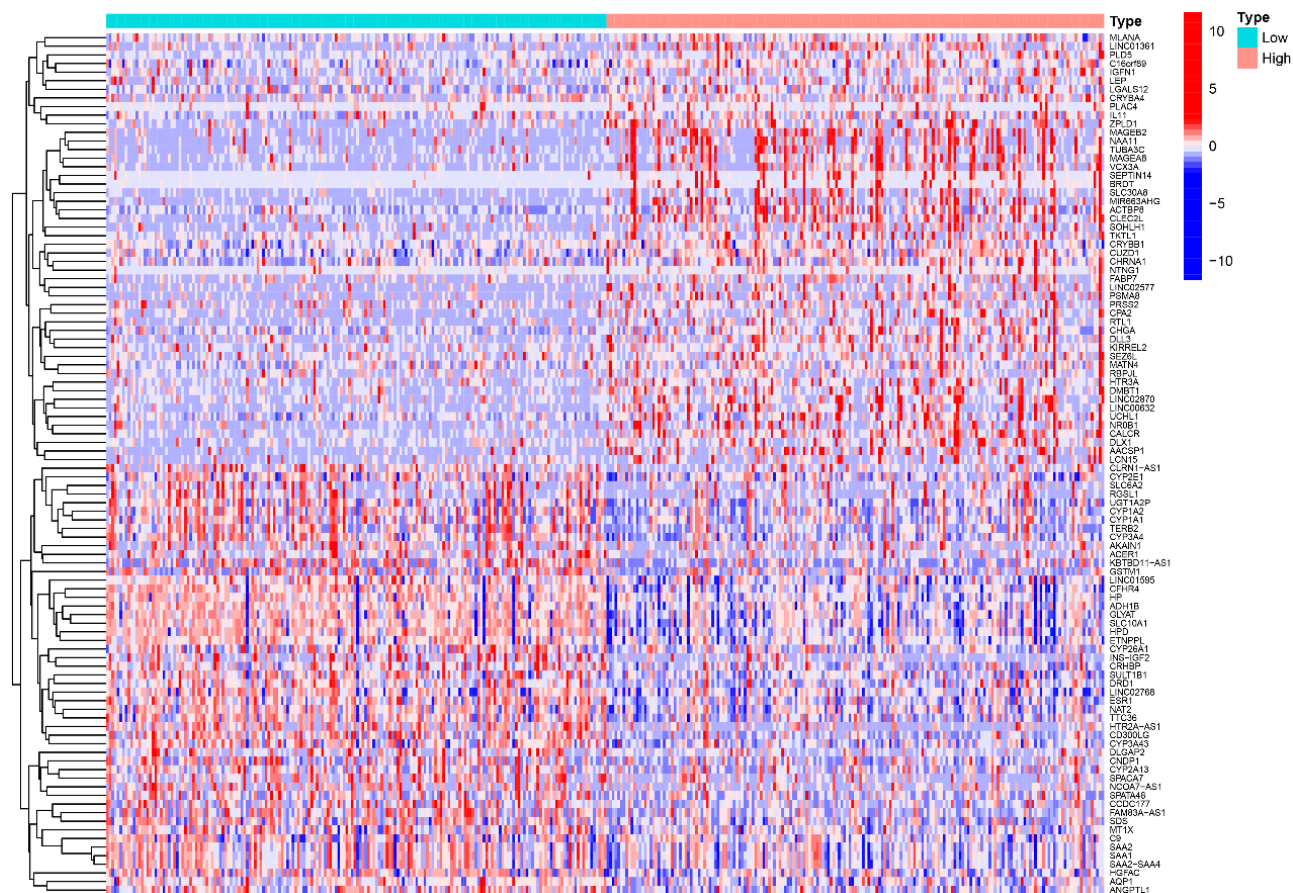

**Figure S5** P3H1 and GATA3 (A) and IL10 (B) correlation analysis in tumor tissues of TCGA-LIHC cohort.

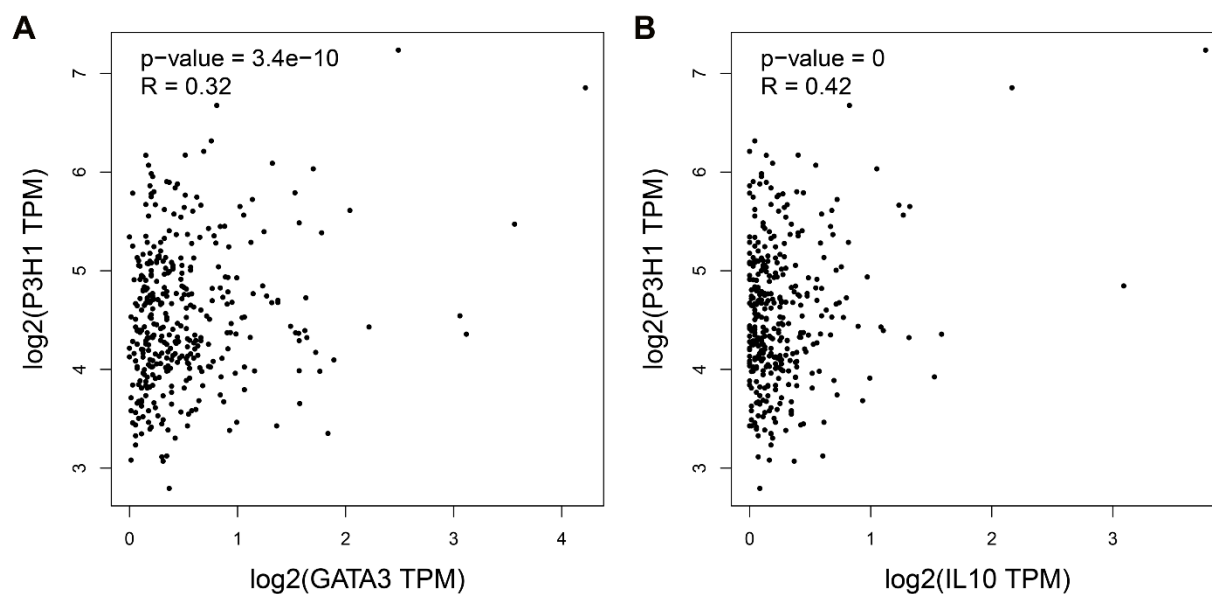

**Figure S6** Exploration of upstream lncRNAs and miRNAs of P3H1 in LIHC. (A) The binding sequence of hsa-miR-29c-3p on P3H1 using starBase database. (B) AL355488.1 and P3H1 correlation analysis. (C) HCG18 and P3H1 correlation analysis. (D) THUMPD3-AS1 and P3H1 correlation analysis.

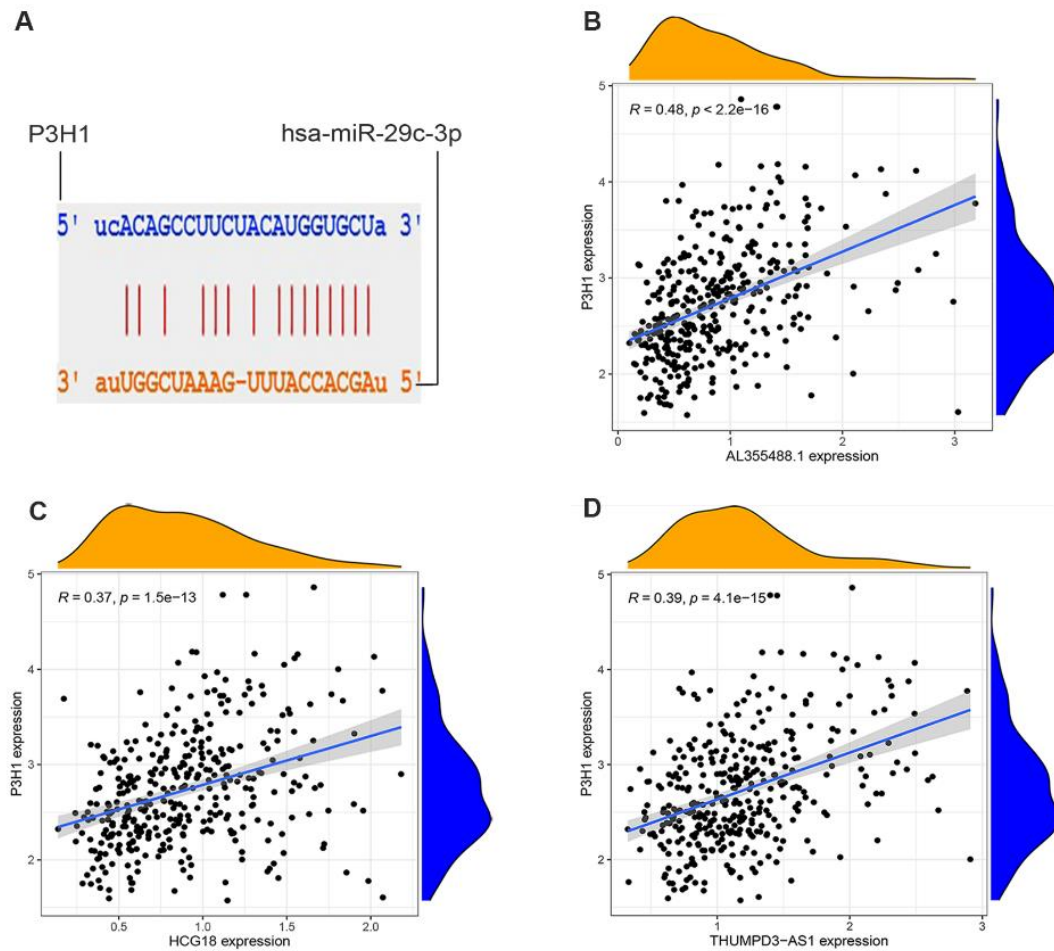

**Table S1** Database and its website.

| Databases                                                                           | Website                                                                                                                                                                               |
|-------------------------------------------------------------------------------------|---------------------------------------------------------------------------------------------------------------------------------------------------------------------------------------|
| Xena Browser                                                                        | <a href="https://xenabrowser.net/datapages/">https://xenabrowser.net/datapages/</a>                                                                                                   |
| The Cancer Cell Line Encyclopedia (CCLE)                                            | <a href="https://portals.broadinstitute.org/ccle/about">https://portals.broadinstitute.org/ccle/about</a>                                                                             |
| cBioPortal                                                                          | <a href="http://www.cbioportal.org/">http://www.cbioportal.org/</a>                                                                                                                   |
| Catalogue of Somatic Mutations in Cancer (COSMIC)                                   | <a href="https://cancer.sanger.ac.uk/cosmic/">https://cancer.sanger.ac.uk/cosmic/</a>                                                                                                 |
| Gene Expression Omnibus (GEO)                                                       | <a href="https://www.ncbi.nlm.nih.gov/geo/">https://www.ncbi.nlm.nih.gov/geo/</a>                                                                                                     |
| TIMER2.0                                                                            | <a href="http://timer.cistrome.org/">http://timer.cistrome.org/</a>                                                                                                                   |
| The Cancer Genome Atlas (TCGA) Program                                              | <a href="https://www.cancer.gov/about-nci/organization/ccg/research/structural-genomics/tcga">https://www.cancer.gov/about-nci/organization/ccg/research/structural-genomics/tcga</a> |
| International Cancer Genome Consortium (ICGC) Data Portal                           | <a href="https://dcc.icgc.org/">https://dcc.icgc.org/</a>                                                                                                                             |
| Gene Set Cancer Analysis (GSCA)                                                     | <a href="http://bioinfo.life.hust.edu.cn/GSCA/#/">http://bioinfo.life.hust.edu.cn/GSCA/#/</a>                                                                                         |
| EWAS Data Hub                                                                       | <a href="https://ngdc.cncb.ac.cn/ewas/datahub/index">https://ngdc.cncb.ac.cn/ewas/datahub/index</a>                                                                                   |
| Clinical Proteomic Tumor Analysis Consortium (CPTAC) Confirmatory/Discovery dataset | <a href="http://ualcan.path.uab.edu/analysis-prot.html">http://ualcan.path.uab.edu/analysis-prot.html</a>                                                                             |
| starBase                                                                            |                                                                                                                                                                                       |
| Integrative Molecular Database of Hepatocellular Carcinoma (HCCDB)                  | <a href="http://starbase.sysu.edu.cn/">http://starbase.sysu.edu.cn/</a><br><a href="http://lifeome.net/database/hccdb/home.html">http://lifeome.net/database/hccdb/home.html</a>      |
| Comprehensive Analysis on Multi-Omics of Immunotherapy in Pan-cancer (CAMOIP)       | <a href="https://www.camoip.net/">https://www.camoip.net/</a>                                                                                                                         |
| The Cancer Immunome Database (TCIA)                                                 | <a href="https://tcia.at/home">https://tcia.at/home</a>                                                                                                                               |

**Table S2** TCGA-LIHC data was used to conduct univariate and multivariate analyses of variable factors affecting overall survival

| Characteristics    | Total(N) | HR(95%<br>Univariate analysis | CI) | P value<br>Univariate<br>analysis | HR(95%<br>Multivariate<br>analysis | CI) | P value<br>Multivariate<br>analysis |
|--------------------|----------|-------------------------------|-----|-----------------------------------|------------------------------------|-----|-------------------------------------|
| P3H1               | 373      |                               |     |                                   |                                    |     |                                     |
| Low                | 186      | Reference                     |     |                                   |                                    |     |                                     |
| High               | 187      | 2.054 (1.438-2.933)           |     | <0.001                            | 1.892 (1.286-2.782)                |     | 0.001                               |
| Age                | 373      |                               |     |                                   |                                    |     |                                     |
| ≤60                | 177      | Reference                     |     |                                   |                                    |     |                                     |
| >60                | 196      | 1.205 (0.850-1.708)           |     | 0.295                             |                                    |     |                                     |
| Gender             | 373      |                               |     |                                   |                                    |     |                                     |
| Female             | 121      | Reference                     |     |                                   |                                    |     |                                     |
| Male               | 252      | 0.793 (0.557-1.130)           |     | 0.200                             |                                    |     |                                     |
| Race               | 344      |                               |     |                                   |                                    |     |                                     |
| White              | 185      | Reference                     |     |                                   |                                    |     |                                     |
| Asian              | 159      | 0.755 (0.519-1.100)           |     | 0.144                             |                                    |     |                                     |
| BMI                | 336      |                               |     |                                   |                                    |     |                                     |
| ≤25                | 177      | Reference                     |     |                                   |                                    |     |                                     |
| >25                | 159      | 0.798 (0.550-1.158)           |     | 0.235                             |                                    |     |                                     |
| Pathologic stage   | 349      |                               |     |                                   |                                    |     |                                     |
| Stage I&Stage II   | 259      | Reference                     |     |                                   |                                    |     |                                     |
| Stage III&Stage IV | 90       | 2.504 (1.727-3.631)           |     | <0.001                            | 2.244 (1.539-3.270)                |     | <0.001                              |
| Histologic grade   | 368      |                               |     |                                   |                                    |     |                                     |
| G1&G2              | 233      | Reference                     |     |                                   |                                    |     |                                     |
| G3&G4              | 135      | 1.091 (0.761-1.564)           |     | 0.636                             |                                    |     |                                     |
| Vascular invasion  | 317      |                               |     |                                   |                                    |     |                                     |
| No                 | 208      | Reference                     |     |                                   |                                    |     |                                     |
| Yes                | 109      | 1.344 (0.887-2.035)           |     | 0.163                             |                                    |     |                                     |
| AFP(ng/ml)         | 279      |                               |     |                                   |                                    |     |                                     |
| ≤400               | 215      | Reference                     |     |                                   |                                    |     |                                     |
| >400               | 64       | 1.075 (0.658-1.759)           |     | 0.772                             |                                    |     |                                     |

**Table S3** TCGA-LIHC data was used to conduct univariate and multivariate analyses of variable factors affecting the progress-free interval

| Characteristics    | Total(N) | HR(95%<br>Univariate analysis | CI) | P value<br>Univariate<br>analysis | HR(95%<br>Multivariate analysis | CI) | P value<br>Multivariate<br>analysis |
|--------------------|----------|-------------------------------|-----|-----------------------------------|---------------------------------|-----|-------------------------------------|
| P3H1               | 373      |                               |     |                                   |                                 |     |                                     |
| Low                | 186      | Reference                     |     |                                   |                                 |     |                                     |
| High               | 187      | 1.607 (1.200-2.152)           |     | 0.001                             | 1.478 (1.045-2.089)             |     | 0.027                               |
| Age                | 373      |                               |     |                                   |                                 |     |                                     |
| <=60               | 177      | Reference                     |     |                                   |                                 |     |                                     |
| >60                | 196      | 0.960 (0.718-1.284)           |     | 0.783                             |                                 |     |                                     |
| Gender             | 373      |                               |     |                                   |                                 |     |                                     |
| Female             | 121      | Reference                     |     |                                   |                                 |     |                                     |
| Male               | 252      | 0.982 (0.721-1.338)           |     | 0.909                             |                                 |     |                                     |
| Race               | 344      |                               |     |                                   |                                 |     |                                     |
| White              | 185      | Reference                     |     |                                   |                                 |     |                                     |
| Asian              | 159      | 0.781 (0.577-1.057)           |     | 0.109                             |                                 |     |                                     |
| BMI                | 336      |                               |     |                                   |                                 |     |                                     |
| <=25               | 177      | Reference                     |     |                                   |                                 |     |                                     |
| >25                | 159      | 0.936 (0.689-1.272)           |     | 0.673                             |                                 |     |                                     |
| Pathologic stage   | 349      |                               |     |                                   |                                 |     |                                     |
| Stage I&Stage II   | 259      | Reference                     |     |                                   |                                 |     |                                     |
| Stage III&Stage IV | 90       | 2.201 (1.591-3.046)           |     | <0.001                            | 1.763 (1.172-2.652)             |     | 0.007                               |
| Histologic grade   | 368      |                               |     |                                   |                                 |     |                                     |
| G1&G2              | 233      | Reference                     |     |                                   |                                 |     |                                     |
| G3&G4              | 135      | 1.152 (0.853-1.557)           |     | 0.355                             |                                 |     |                                     |
| Vascular invasion  | 317      |                               |     |                                   |                                 |     |                                     |
| No                 | 208      | Reference                     |     |                                   |                                 |     |                                     |
| Yes                | 109      | 1.676 (1.196-2.348)           |     | 0.003                             | 1.366 (0.948-1.969)             |     | 0.094                               |
| AFP(ng/ml)         | 279      |                               |     |                                   |                                 |     |                                     |
| <=400              | 215      | Reference                     |     |                                   |                                 |     |                                     |
| >400               | 64       | 1.045 (0.698-1.563)           |     | 0.832                             |                                 |     |                                     |

**Table S4** TCGA-LIHC data was used to conduct univariate and multivariate analyses of variable factors affecting disease-specific survival

| Characteristics    | Total(N) | HR(95%<br>Univariate analysis | CI) | P value<br>Univariate<br>analysis | HR(95%<br>Multivariate<br>analysis | CI) | P value<br>Multivariate<br>analysis |
|--------------------|----------|-------------------------------|-----|-----------------------------------|------------------------------------|-----|-------------------------------------|
| P3H1               | 365      |                               |     |                                   |                                    |     |                                     |
| Low                | 182      | Reference                     |     |                                   |                                    |     |                                     |
| High               | 183      | 2.187 (1.383-3.460)           |     | <0.001                            | 1.925 (1.138-3.256)                |     | 0.015                               |
| Age                | 365      |                               |     |                                   |                                    |     |                                     |
| <=60               | 174      | Reference                     |     |                                   |                                    |     |                                     |
| >60                | 191      | 0.846 (0.543-1.317)           |     | 0.458                             |                                    |     |                                     |
| Gender             | 365      |                               |     |                                   |                                    |     |                                     |
| Female             | 118      | Reference                     |     |                                   |                                    |     |                                     |
| Male               | 247      | 0.813 (0.516-1.281)           |     | 0.373                             |                                    |     |                                     |
| Race               | 336      |                               |     |                                   |                                    |     |                                     |
| White              | 180      | Reference                     |     |                                   |                                    |     |                                     |
| Asian              | 156      | 0.648 (0.399-1.051)           |     | 0.079                             | 0.977 (0.571-1.670)                |     | 0.931                               |
| BMI                | 329      |                               |     |                                   |                                    |     |                                     |
| <=25               | 175      | Reference                     |     |                                   |                                    |     |                                     |
| >25                | 154      | 0.826 (0.512-1.330)           |     | 0.431                             |                                    |     |                                     |
| Pathologic stage   | 341      |                               |     |                                   |                                    |     |                                     |
| Stage I&Stage II   | 254      | Reference                     |     |                                   |                                    |     |                                     |
| Stage III&Stage IV | 87       | 3.803 (2.342-6.176)           |     | <0.001                            | 3.222 (1.916-5.418)                |     | <0.001                              |
| Histologic grade   | 360      |                               |     |                                   |                                    |     |                                     |
| G1&G2              | 227      | Reference                     |     |                                   |                                    |     |                                     |
| G3&G4              | 133      | 1.086 (0.683-1.728)           |     | 0.726                             |                                    |     |                                     |
| Vascular invasion  | 309      |                               |     |                                   |                                    |     |                                     |
| No                 | 204      | Reference                     |     |                                   |                                    |     |                                     |
| Yes                | 105      | 1.277 (0.707-2.306)           |     | 0.418                             |                                    |     |                                     |
| AFP(ng/ml)         | 275      |                               |     |                                   |                                    |     |                                     |
| <=400              | 214      | Reference                     |     |                                   |                                    |     |                                     |
| >400               | 61       | 0.867 (0.450-1.668)           |     | 0.668                             |                                    |     |                                     |



**Table S5** Differences in gene expression between patients with high P3H1 expression and those with low P3H1 expression

| gene       | lowMean  | highMean | logFC    | pValue   | fdr      |
|------------|----------|----------|----------|----------|----------|
| PIN1-DT    | 0.022946 | 0.046482 | 1.018457 | 0.001355 | 0.002596 |
| KCNQ4      | 0.121209 | 0.367381 | 1.599776 | 2.72E-07 | 1.17E-06 |
| LDHAL6A    | 0.0164   | 0.032947 | 1.006468 | 0.001002 | 0.001966 |
| TINAG      | 1.597018 | 3.344457 | 1.066391 | 7.00E-05 | 0.000177 |
| HOXA9      | 0.026945 | 0.090596 | 1.749452 | 0.002007 | 0.0037   |
| SLC38A5    | 0.275823 | 0.927919 | 1.750255 | 4.56E-06 | 1.50E-05 |
| RCOR2      | 0.148879 | 0.668262 | 2.166276 | 2.73E-10 | 2.25E-09 |
| NCCRP1     | 0.073937 | 0.471374 | 2.672497 | 0.001515 | 0.002873 |
| PPIAP77    | 0.513941 | 1.038296 | 1.014543 | 4.40E-07 | 1.81E-06 |
| CDC20      | 3.875965 | 17.34762 | 2.16211  | 1.31E-31 | 1.33E-27 |
| IGSF11     | 0.010372 | 0.081    | 2.965262 | 3.28E-11 | 3.40E-10 |
| ADH1C      | 316.5764 | 150.5887 | -1.07194 | 2.00E-12 | 2.68E-11 |
| MEP1A      | 1.078985 | 5.985123 | 2.471706 | 9.57E-13 | 1.40E-11 |
| RIMS2      | 0.029662 | 0.07091  | 1.257382 | 0.001241 | 0.002393 |
| MEIOSIN    | 0.007514 | 0.019671 | 1.388348 | 4.66E-08 | 2.37E-07 |
| ZNF320     | 0.647318 | 1.45067  | 1.164174 | 5.37E-13 | 8.35E-12 |
| DTL        | 1.485325 | 3.592794 | 1.274328 | 9.20E-21 | 8.16E-19 |
| BPIFB2     | 4.560834 | 14.23503 | 1.642076 | 0.022078 | 0.032021 |
| SGO2       | 0.424382 | 1.220322 | 1.523826 | 7.26E-26 | 3.35E-23 |
| NRBF2P6    | 0.127469 | 0.265317 | 1.05757  | 8.45E-09 | 5.04E-08 |
| GABRR1     | 0.004231 | 0.025989 | 2.618755 | 2.90E-07 | 1.24E-06 |
| FAM90A1    | 0.06151  | 0.185963 | 1.596124 | 2.04E-10 | 1.73E-09 |
| FUT7       | 0.081164 | 0.186632 | 1.201282 | 0.000103 | 0.000249 |
| CDKN2A     | 2.116408 | 6.107962 | 1.529073 | 8.12E-14 | 1.53E-12 |
| SHCBP1     | 0.507707 | 1.562194 | 1.621506 | 8.71E-21 | 7.83E-19 |
| IL17REL    | 0.009987 | 0.026371 | 1.400849 | 0.00057  | 0.001179 |
| PRELID3BP4 | 0.039659 | 0.090416 | 1.188944 | 0.019814 | 0.029037 |
| INKA2-AS1  | 0.024094 | 0.048895 | 1.020998 | 7.62E-07 | 2.97E-06 |
| FCGBP      | 0.642337 | 1.708447 | 1.411282 | 1.36E-10 | 1.20E-09 |
| IL1B       | 0.279866 | 0.562101 | 1.006094 | 1.79E-05 | 5.14E-05 |
| LINC02159  | 0.095967 | 0.221459 | 1.206424 | 0.001872 | 0.003475 |
| U8         | 0.045952 | 0.13015  | 1.50197  | 0.00336  | 0.005888 |
| FAM215B    | 0.007283 | 0.01467  | 1.010247 | 9.10E-07 | 3.49E-06 |
| IGHV1-45   | 0.122145 | 0.31707  | 1.376204 | 0.011882 | 0.018306 |
| KCNH2      | 0.334758 | 0.893668 | 1.416618 | 1.62E-05 | 4.72E-05 |
| STK32A     | 0.024589 | 0.05904  | 1.263698 | 7.82E-05 | 0.000195 |
| COL9A2     | 0.723287 | 1.824404 | 1.334785 | 1.02E-13 | 1.87E-12 |
| RPL7P18    | 0.027478 | 0.059593 | 1.116859 | 0.00036  | 0.000778 |
| CRHBP      | 1.771902 | 0.798812 | -1.14937 | 2.32E-06 | 8.13E-06 |
| NFYAP1     | 0.031942 | 0.08242  | 1.367541 | 2.07E-07 | 9.13E-07 |
| FAM24B     | 0.265665 | 0.83048  | 1.644335 | 2.78E-17 | 1.15E-15 |

|            |          |          |          |          |          |
|------------|----------|----------|----------|----------|----------|
| H2AX       | 11.40762 | 24.62218 | 1.109961 | 2.45E-24 | 5.99E-22 |
| LINC02613  | 0.056923 | 0.125011 | 1.13498  | 5.63E-05 | 0.000145 |
| NRXN1      | 0.002652 | 0.007037 | 1.408109 | 1.33E-06 | 4.91E-06 |
| GINS1      | 1.205925 | 3.735552 | 1.631182 | 2.26E-26 | 1.48E-23 |
| CD7        | 1.810743 | 6.936259 | 1.937576 | 3.22E-07 | 1.37E-06 |
| CELF2-AS1  | 0.011024 | 0.095246 | 3.110988 | 3.52E-07 | 1.48E-06 |
| IL37       | 0.015682 | 0.048915 | 1.641157 | 9.03E-07 | 3.46E-06 |
| HMG2P15    | 0.897095 | 2.208578 | 1.299786 | 3.00E-08 | 1.59E-07 |
| PCLO       | 0.029806 | 0.099166 | 1.73424  | 2.07E-10 | 1.75E-09 |
| H1-7       | 0.022334 | 0.093384 | 2.063913 | 7.49E-06 | 2.35E-05 |
| TLR10      | 0.129745 | 0.417403 | 1.685756 | 0.008507 | 0.01357  |
| LINC00221  | 0.401225 | 1.826177 | 2.186342 | 1.91E-11 | 2.08E-10 |
| MCM8       | 0.719806 | 1.661073 | 1.206436 | 3.01E-22 | 3.80E-20 |
| SNORA70    | 0.006424 | 0.01513  | 1.235902 | 2.31E-09 | 1.56E-08 |
| LINC01152  | 0.101587 | 0.287587 | 1.501284 | 0.000169 | 0.000391 |
| RALYL      | 0.043001 | 0.112117 | 1.382558 | 4.96E-05 | 0.000129 |
| KCNJ10     | 0.113009 | 0.470902 | 2.058993 | 3.93E-06 | 1.31E-05 |
| SLC34A3    | 0.04536  | 0.099896 | 1.139    | 0.00041  | 0.000875 |
| BMP7       | 0.126686 | 0.504343 | 1.993145 | 0.000318 | 0.000694 |
| SCAT1      | 0.027198 | 0.076394 | 1.48994  | 0.001761 | 0.003292 |
| CHGB       | 0.111376 | 0.71504  | 2.682592 | 3.33E-09 | 2.17E-08 |
| C11orf86   | 0.08759  | 0.307297 | 1.810796 | 0.000483 | 0.001014 |
| FXYD3      | 1.636117 | 4.21109  | 1.363918 | 4.84E-07 | 1.97E-06 |
| CIBAR2     | 0.016177 | 0.040533 | 1.325136 | 0.015515 | 0.023294 |
| LYG2       | 0.08314  | 0.211223 | 1.345149 | 6.20E-08 | 3.07E-07 |
| CENPH      | 1.261861 | 2.969217 | 1.23453  | 2.05E-29 | 8.31E-26 |
| CLDN19     | 0.220496 | 0.484378 | 1.13538  | 0.000142 | 0.000334 |
| RNF151     | 0.023245 | 0.136497 | 2.553906 | 0.003694 | 0.006412 |
| GSTCD-AS1  | 0.01453  | 0.031019 | 1.094116 | 2.88E-06 | 9.87E-06 |
| PLAC1      | 0.008356 | 0.088888 | 3.411154 | 1.64E-10 | 1.43E-09 |
| OTOG       | 0.052927 | 0.116705 | 1.140797 | 5.23E-05 | 0.000136 |
| FAM225B    | 0.005567 | 0.013716 | 1.300772 | 0.000747 | 0.001509 |
| VN1R42P    | 0.048006 | 0.097968 | 1.029107 | 7.08E-05 | 0.000179 |
| UGT1A7     | 0.044445 | 0.377136 | 3.085004 | 0.003496 | 0.006099 |
| EFNA5      | 0.245797 | 1.049414 | 2.094047 | 2.20E-05 | 6.21E-05 |
| PIK3CD-AS2 | 0.275683 | 1.181687 | 2.099764 | 4.27E-14 | 8.50E-13 |
| LMNB1      | 4.054273 | 10.34555 | 1.351495 | 3.41E-23 | 5.54E-21 |
| MCM2       | 3.984609 | 11.29465 | 1.50313  | 6.47E-25 | 1.90E-22 |
| FSIP2-AS1  | 0.055465 | 0.119309 | 1.105065 | 4.97E-06 | 1.62E-05 |
| DUSP26     | 0.091656 | 0.373679 | 2.027498 | 9.09E-06 | 2.80E-05 |
| SMIM31     | 0.203091 | 0.623834 | 1.619037 | 4.07E-06 | 1.35E-05 |
| NCAPG      | 1.094921 | 3.396441 | 1.633197 | 3.64E-25 | 1.14E-22 |
| LINC01194  | 0.082621 | 0.496502 | 2.58722  | 2.56E-11 | 2.72E-10 |
| PTCH2      | 0.156729 | 0.39675  | 1.339962 | 0.00419  | 0.007179 |

|             |          |          |          |          |          |
|-------------|----------|----------|----------|----------|----------|
| PGC         | 35.65553 | 97.09583 | 1.445284 | 7.84E-05 | 0.000195 |
| SPINDOC     | 2.035629 | 4.753062 | 1.223383 | 3.37E-27 | 3.80E-24 |
| CEP126      | 0.047289 | 0.156235 | 1.724155 | 1.51E-11 | 1.67E-10 |
| TAF4B       | 0.113083 | 0.228733 | 1.016274 | 0.009611 | 0.015151 |
| PLEKHG4     | 0.318971 | 0.692797 | 1.119007 | 9.04E-08 | 4.31E-07 |
| CLGN        | 2.42172  | 6.84762  | 1.499571 | 1.23E-10 | 1.10E-09 |
| CASC19      | 0.696605 | 1.507661 | 1.1139   | 0.007896 | 0.012687 |
| KIRREL2     | 0.028124 | 2.819373 | 6.647428 | 2.09E-06 | 7.41E-06 |
| LINC02367   | 0.04108  | 0.109137 | 1.40963  | 1.09E-11 | 1.24E-10 |
| SLCO4C1     | 0.53662  | 1.208672 | 1.17145  | 8.63E-09 | 5.13E-08 |
| LINC02893   | 0.078108 | 0.31301  | 2.002661 | 3.09E-12 | 3.96E-11 |
| SYT6        | 0.01447  | 0.039814 | 1.460167 | 4.43E-06 | 1.46E-05 |
| EYA1        | 0.020953 | 0.132149 | 2.656937 | 4.94E-05 | 0.000129 |
| SEPTIN14    | 0.004716 | 0.287264 | 5.928733 | 1.03E-09 | 7.53E-09 |
| MCOLN2      | 0.175029 | 0.412041 | 1.235198 | 5.34E-05 | 0.000138 |
| CKM         | 0.038426 | 0.161259 | 2.069228 | 5.84E-09 | 3.60E-08 |
| ALX4        | 0.01592  | 0.072503 | 2.187203 | 0.000542 | 0.001126 |
| GPR156      | 0.006498 | 0.016827 | 1.372697 | 0.000407 | 0.000869 |
| ZNF695      | 0.038463 | 0.154596 | 2.006957 | 1.02E-11 | 1.17E-10 |
| C6          | 66.18464 | 30.79561 | -1.10377 | 1.59E-15 | 4.38E-14 |
| HPCA        | 0.018916 | 0.071995 | 1.928308 | 2.50E-05 | 6.96E-05 |
| RAB6C-AS1   | 0.007559 | 0.023035 | 1.607595 | 0.009596 | 0.015136 |
| PLTP        | 8.450479 | 23.06907 | 1.448855 | 1.54E-05 | 4.51E-05 |
| LINC02413   | 0.104326 | 0.49822  | 2.255684 | 0.00137  | 0.002622 |
| TLL2        | 0.030399 | 0.097455 | 1.680721 | 8.14E-07 | 3.16E-06 |
| PTBP1P      | 0.008355 | 0.019175 | 1.198601 | 9.30E-06 | 2.86E-05 |
| SOX12       | 4.006224 | 8.263457 | 1.044502 | 1.56E-15 | 4.32E-14 |
| TRNP1       | 5.374495 | 17.81824 | 1.729154 | 1.41E-13 | 2.49E-12 |
| MIR210HG    | 0.820088 | 2.031573 | 1.308747 | 3.36E-14 | 6.86E-13 |
| CHST2       | 0.687783 | 1.475302 | 1.100984 | 2.83E-06 | 9.72E-06 |
| DNER        | 0.642829 | 1.699119 | 1.402281 | 0.000108 | 0.000262 |
| LAMB4       | 0.023176 | 0.119311 | 2.364019 | 4.55E-05 | 0.00012  |
| TEKT2       | 0.027593 | 0.147203 | 2.415433 | 1.27E-09 | 9.13E-09 |
| RDH8        | 0.097734 | 0.258852 | 1.405189 | 0.000294 | 0.000646 |
| NELL2       | 0.175372 | 0.44811  | 1.353432 | 2.15E-06 | 7.59E-06 |
| B3GALT1-AS1 | 0.120619 | 0.367771 | 1.608351 | 0.005023 | 0.008434 |
| HIC2        | 0.669151 | 1.482981 | 1.148097 | 1.57E-13 | 2.76E-12 |
| ASIC1       | 0.381433 | 0.826524 | 1.115626 | 4.87E-07 | 1.98E-06 |
| SIX2        | 0.257729 | 1.039139 | 2.011461 | 1.55E-07 | 7.03E-07 |
| MACROD2     | 0.257331 | 0.624676 | 1.279479 | 6.14E-07 | 2.44E-06 |
| DQX1        | 0.408598 | 1.322099 | 1.694075 | 1.25E-12 | 1.78E-11 |
| SPNS2       | 4.142157 | 1.907536 | -1.11867 | 6.28E-05 | 0.00016  |
| CDC6        | 1.485447 | 4.372938 | 1.557706 | 2.67E-23 | 4.60E-21 |
| DNAI3       | 0.012145 | 0.039386 | 1.697303 | 0.01983  | 0.029057 |

|           |          |          |          |          |          |
|-----------|----------|----------|----------|----------|----------|
| LETM1P2   | 0.007588 | 0.034738 | 2.194716 | 1.57E-05 | 4.60E-05 |
| RPL12P25  | 0.056764 | 0.196645 | 1.792546 | 1.49E-13 | 2.64E-12 |
| ZFY-AS1   | 0.391985 | 0.188163 | -1.05882 | 0.008048 | 0.012911 |
| VCX3B     | 0.017809 | 0.120948 | 2.763742 | 8.19E-06 | 2.55E-05 |
| RIPPLY3   | 0.205814 | 0.508155 | 1.303927 | 1.27E-06 | 4.72E-06 |
| LINC01303 | 0.018479 | 0.0529   | 1.517348 | 1.95E-05 | 5.57E-05 |
| LINC01357 | 0.114653 | 0.278917 | 1.282568 | 7.04E-07 | 2.77E-06 |
| ZAN       | 0.003053 | 0.006938 | 1.184226 | 0.002335 | 0.004244 |
| SAA1      | 1959.516 | 497.2402 | -1.97848 | 7.83E-06 | 2.45E-05 |
| KHDC1     | 0.026921 | 0.145458 | 2.433818 | 2.59E-12 | 3.40E-11 |
| LRRIQ1    | 0.005479 | 0.023528 | 2.102355 | 1.29E-08 | 7.39E-08 |
| TMPRSS3   | 1.170548 | 2.646879 | 1.177108 | 0.000726 | 0.001469 |
| PNOC      | 0.050837 | 0.130077 | 1.355402 | 0.010794 | 0.016806 |
| SLC1A7    | 0.86656  | 3.33755  | 1.945418 | 0.00024  | 0.000537 |
| MYO18B    | 0.174395 | 0.664595 | 1.930121 | 1.16E-08 | 6.71E-08 |
| PKIA      | 0.060165 | 0.576145 | 3.259443 | 2.09E-14 | 4.53E-13 |
| LINC00540 | 0.027543 | 0.186472 | 2.759195 | 1.01E-09 | 7.35E-09 |
| SPC25     | 1.033708 | 2.808267 | 1.441852 | 1.11E-24 | 3.10E-22 |
| ZBTB32    | 0.088311 | 0.176867 | 1.002011 | 6.41E-08 | 3.16E-07 |
| IL4I1     | 0.887158 | 2.945808 | 1.7314   | 1.57E-11 | 1.73E-10 |
| STRIP2    | 0.274053 | 0.620705 | 1.179454 | 3.96E-11 | 4.00E-10 |
| PRR11     | 0.821995 | 2.549738 | 1.633146 | 4.96E-26 | 2.52E-23 |
| CYP2C9    | 159.6098 | 74.2828  | -1.10345 | 6.20E-12 | 7.49E-11 |
| RIMKLA    | 0.064818 | 0.133466 | 1.042009 | 0.015766 | 0.023642 |
| PRKG2     | 0.010238 | 0.04669  | 2.18912  | 0.000351 | 0.00076  |
| PRR7-AS1  | 0.066017 | 0.146163 | 1.146659 | 6.05E-12 | 7.35E-11 |
| KLRK1-AS1 | 0.020048 | 0.063222 | 1.656966 | 7.75E-05 | 0.000194 |
| IL17B     | 0.036644 | 0.080031 | 1.126995 | 2.08E-07 | 9.17E-07 |
| TOP2A     | 3.957568 | 11.67166 | 1.560324 | 1.16E-21 | 1.28E-19 |
| RUBCNL    | 0.167977 | 0.400372 | 1.253081 | 2.02E-06 | 7.18E-06 |
| EMC3-AS1  | 0.185312 | 0.432661 | 1.223282 | 2.30E-18 | 1.24E-16 |
| RFPL4B    | 0.188706 | 1.133846 | 2.58701  | 3.94E-07 | 1.64E-06 |
| CDX2      | 0.023322 | 0.189467 | 3.022172 | 0.000339 | 0.000736 |
| DMBT1     | 0.052835 | 1.831412 | 5.115315 | 2.85E-08 | 1.52E-07 |
| NAALAD2   | 0.13244  | 0.298654 | 1.173139 | 1.50E-10 | 1.31E-09 |
| BAMBI     | 11.21765 | 22.68314 | 1.01585  | 1.04E-07 | 4.91E-07 |
| LINC01293 | 0.012614 | 0.054605 | 2.114015 | 0.000219 | 0.000495 |
| MAGEB17   | 0.669974 | 1.630784 | 1.283389 | 0.000391 | 0.000839 |
| COX7B2    | 3.300887 | 11.36624 | 1.78383  | 1.02E-07 | 4.79E-07 |
| DIPK1C    | 0.080274 | 0.182551 | 1.185291 | 0.000596 | 0.001229 |
| UPK1A     | 0.192876 | 0.640549 | 1.731634 | 0.001201 | 0.002325 |
| IFI27L2   | 2.943782 | 6.702489 | 1.187026 | 1.19E-12 | 1.71E-11 |
| HOXC4     | 0.0957   | 0.266365 | 1.476815 | 0.000712 | 0.001444 |
| EFCAB8    | 0.014308 | 0.032191 | 1.169837 | 0.000224 | 0.000505 |

|            |          |          |          |          |          |
|------------|----------|----------|----------|----------|----------|
| SLC2A1-AS1 | 0.036855 | 0.07696  | 1.062272 | 0.003402 | 0.005951 |
| PPP1R14D   | 0.790115 | 1.679585 | 1.087969 | 0.001761 | 0.003292 |
| H2BC14     | 0.027613 | 0.058766 | 1.089612 | 0.000283 | 0.000624 |
| FAM3D      | 0.062131 | 0.305765 | 2.299032 | 0.004012 | 0.006904 |
| ZC2HC1A    | 0.403536 | 0.967814 | 1.262033 | 1.19E-16 | 4.19E-15 |
| GPR63      | 0.018171 | 0.048861 | 1.427042 | 3.19E-05 | 8.65E-05 |
| SLFN13     | 0.563103 | 1.35313  | 1.264829 | 1.85E-07 | 8.27E-07 |
| IGKV3-11   | 16.46512 | 44.66912 | 1.439865 | 0.034503 | 0.047899 |
| PAPLN-AS1  | 0.066095 | 0.136402 | 1.045249 | 1.48E-05 | 4.35E-05 |
| BBOX1-AS1  | 0.050396 | 0.591946 | 3.554093 | 2.56E-09 | 1.71E-08 |
| LINC01234  | 0.261885 | 0.632743 | 1.272684 | 2.06E-08 | 1.12E-07 |
| PCDH15     | 0.002008 | 0.005743 | 1.515742 | 8.79E-08 | 4.20E-07 |
| DKK1       | 2.502905 | 15.81157 | 2.659305 | 1.03E-08 | 6.04E-08 |
| NAT2       | 6.710575 | 2.950393 | -1.18553 | 1.79E-07 | 7.99E-07 |
| TRPV6      | 0.117519 | 0.242345 | 1.044166 | 0.001033 | 0.002023 |
| FAM153B    | 0.023203 | 0.047597 | 1.036598 | 0.001237 | 0.002387 |
| AKNAD1     | 0.003633 | 0.009232 | 1.345438 | 1.71E-08 | 9.55E-08 |
| ADAMTS20   | 0.004066 | 0.027744 | 2.770504 | 2.01E-13 | 3.46E-12 |
| LINC02381  | 1.137784 | 3.459685 | 1.604414 | 0.000155 | 0.000362 |
| IL21R      | 0.158048 | 0.357846 | 1.178976 | 2.49E-05 | 6.93E-05 |
| ACSBG1     | 0.027253 | 0.080974 | 1.571061 | 0.000168 | 0.000389 |
| RFLNA      | 0.307451 | 1.986255 | 2.691621 | 0.021422 | 0.031161 |
| TULP1      | 0.004652 | 0.015983 | 1.780521 | 0.000329 | 0.000716 |
| DTNB-AS1   | 0.052531 | 0.142431 | 1.439025 | 0.00081  | 0.001621 |
| ZNF728     | 0.039459 | 0.165713 | 2.070243 | 1.66E-07 | 7.46E-07 |
| LRRN4CL    | 0.092629 | 0.24663  | 1.412813 | 0.01563  | 0.023458 |
| CACNA1B    | 0.008723 | 0.026175 | 1.585381 | 0.001116 | 0.002171 |
| MARK1      | 0.129996 | 0.391366 | 1.590056 | 0.018201 | 0.026919 |
| PSMC3IP    | 0.508293 | 1.109882 | 1.126674 | 4.99E-18 | 2.50E-16 |
| GRIA2      | 0.008885 | 0.049384 | 2.47464  | 7.41E-11 | 6.99E-10 |
| EIF2S3B    | 0.066176 | 0.143052 | 1.112158 | 0.000362 | 0.000783 |
| LINC00519  | 0.052957 | 0.161406 | 1.607802 | 0.003548 | 0.006182 |
| NEXMIF     | 0.009241 | 0.02023  | 1.13039  | 0.004884 | 0.008226 |
| RBFOX3     | 0.004574 | 0.0104   | 1.184969 | 0.00041  | 0.000874 |
| WIF1       | 0.194604 | 0.513435 | 1.399638 | 4.70E-07 | 1.92E-06 |
| SALL4      | 0.279706 | 0.709313 | 1.342511 | 6.38E-05 | 0.000163 |
| HOXC13     | 0.034748 | 0.138031 | 1.98998  | 2.48E-06 | 8.65E-06 |
| PRSS44P    | 0.025664 | 0.075853 | 1.56346  | 2.30E-05 | 6.46E-05 |
| GALNT8     | 0.011728 | 0.05015  | 2.09629  | 7.67E-06 | 2.41E-05 |
| ZNF415     | 0.201769 | 0.524833 | 1.379157 | 8.79E-05 | 0.000217 |
| MICAL1     | 1.539651 | 3.219748 | 1.064344 | 8.82E-10 | 6.55E-09 |
| CCDC183    | 0.297042 | 0.822336 | 1.469063 | 1.49E-13 | 2.64E-12 |
| KLHDC7B    | 0.555889 | 1.33019  | 1.258764 | 0.005256 | 0.008787 |
| CADM2      | 0.04489  | 0.106713 | 1.249269 | 3.48E-13 | 5.60E-12 |

|           |          |          |          |          |          |
|-----------|----------|----------|----------|----------|----------|
| IGLV3-21  | 9.43759  | 29.26245 | 1.63256  | 0.022537 | 0.032614 |
| DHDH      | 0.300217 | 0.777109 | 1.372112 | 5.49E-17 | 2.08E-15 |
| COL9A3    | 0.843029 | 2.060239 | 1.289158 | 0.000221 | 0.000498 |
| C1orf158  | 0.006494 | 0.058442 | 3.169843 | 6.32E-08 | 3.12E-07 |
| HSPA8P8   | 0.060687 | 0.151088 | 1.315925 | 0.000748 | 0.00151  |
| APOL4     | 0.615592 | 1.322984 | 1.103749 | 7.31E-07 | 2.86E-06 |
| DNASE1L3  | 6.432773 | 3.094206 | -1.05587 | 6.50E-13 | 9.92E-12 |
| IGDCC3    | 0.075308 | 0.478301 | 2.667045 | 0.000517 | 0.00108  |
| LINC01608 | 0.469697 | 1.450715 | 1.626962 | 1.01E-10 | 9.25E-10 |
| TMEM158   | 0.437717 | 1.582338 | 1.853986 | 0.000632 | 0.001297 |
| FAM218A   | 0.019121 | 0.060881 | 1.670831 | 5.34E-07 | 2.15E-06 |
| CD70      | 0.117191 | 0.531743 | 2.181865 | 3.15E-05 | 8.54E-05 |
| FAM183A   | 0.18193  | 0.577789 | 1.667162 | 4.99E-10 | 3.88E-09 |
| SV2A      | 0.189608 | 0.706097 | 1.896848 | 1.36E-09 | 9.74E-09 |
| KIF15     | 0.352801 | 1.254596 | 1.830298 | 3.91E-26 | 2.20E-23 |
| E2F2      | 0.282707 | 0.847667 | 1.584192 | 3.29E-25 | 1.11E-22 |
| ANXA8     | 0.046768 | 0.193921 | 2.051884 | 0.027389 | 0.038847 |
| ZNF43     | 0.312657 | 0.748761 | 1.259925 | 2.96E-11 | 3.10E-10 |
| TUBAP2    | 0.084845 | 0.171735 | 1.017289 | 5.70E-14 | 1.10E-12 |
| MATN1     | 0.015015 | 0.041229 | 1.457248 | 7.71E-08 | 3.74E-07 |
| PARBPB    | 0.445072 | 1.125917 | 1.338991 | 4.40E-22 | 5.28E-20 |
| XKR4      | 0.002041 | 0.00981  | 2.264712 | 7.95E-05 | 0.000198 |
| CFHR4     | 19.48851 | 6.800673 | -1.51887 | 4.05E-17 | 1.62E-15 |
| IGFBPL1   | 0.282392 | 0.882687 | 1.644202 | 4.18E-06 | 1.39E-05 |
| EME1      | 0.414667 | 1.215107 | 1.551058 | 7.54E-28 | 1.39E-24 |
| FABP5P7   | 0.083241 | 0.204323 | 1.295484 | 4.80E-06 | 1.57E-05 |
| ISM2      | 0.011628 | 0.129844 | 3.481131 | 6.06E-05 | 0.000155 |
| JPT1      | 9.937859 | 20.03823 | 1.011748 | 1.36E-17 | 6.17E-16 |
| PLAUR     | 1.138896 | 2.596424 | 1.18889  | 1.18E-10 | 1.06E-09 |
| CHGA      | 0.044644 | 4.251296 | 6.5733   | 2.56E-06 | 8.89E-06 |
| CLEC18B   | 0.03254  | 0.070185 | 1.108956 | 1.24E-05 | 3.72E-05 |
| SYNGR4    | 0.133449 | 0.426353 | 1.675755 | 5.25E-05 | 0.000136 |
| WDR87BP   | 0.006631 | 0.036078 | 2.443845 | 1.26E-06 | 4.68E-06 |
| AKR1B1    | 4.857642 | 11.17851 | 1.2024   | 1.80E-06 | 6.47E-06 |
| GLRA3     | 0.002955 | 0.008406 | 1.508438 | 5.51E-06 | 1.78E-05 |
| ZNF257    | 0.068455 | 0.296617 | 2.115378 | 1.01E-16 | 3.63E-15 |
| LINC02910 | 0.022893 | 0.054229 | 1.244153 | 0.002926 | 0.005204 |
| SPDL1     | 0.958135 | 2.09709  | 1.130088 | 1.32E-24 | 3.57E-22 |
| SH3BP1    | 0.883849 | 1.933692 | 1.129487 | 5.53E-14 | 1.07E-12 |
| MMP9      | 5.920261 | 12.52735 | 1.081349 | 2.55E-06 | 8.86E-06 |
| KIFC1     | 2.656517 | 7.670825 | 1.529846 | 2.50E-24 | 6.04E-22 |
| PDZD3     | 0.038754 | 0.103857 | 1.422194 | 0.000101 | 0.000246 |
| RRAD      | 1.268993 | 2.689031 | 1.083402 | 0.003044 | 0.005386 |
| TRBV30    | 0.180589 | 0.362239 | 1.004232 | 0.006312 | 0.01036  |

|             |          |          |          |          |          |
|-------------|----------|----------|----------|----------|----------|
| DLL3        | 0.009435 | 0.13074  | 3.792492 | 6.25E-11 | 6.00E-10 |
| CENPL       | 0.62758  | 1.355299 | 1.11074  | 4.88E-20 | 3.75E-18 |
| GRM4        | 0.0039   | 0.021238 | 2.445117 | 1.08E-07 | 5.08E-07 |
| DLK2        | 0.48652  | 1.151926 | 1.243477 | 8.04E-13 | 1.20E-11 |
| MEG3        | 1.337612 | 3.519993 | 1.395913 | 0.00495  | 0.008323 |
| KMO         | 4.479757 | 2.218225 | -1.01401 | 4.81E-11 | 4.75E-10 |
| MAGEA1      | 3.313699 | 7.930815 | 1.259027 | 0.000427 | 0.000908 |
| LCTL        | 0.040071 | 0.110405 | 1.462171 | 3.10E-07 | 1.32E-06 |
| BCL11A      | 0.100319 | 0.26902  | 1.423118 | 1.89E-05 | 5.41E-05 |
| FILNC1      | 0.0131   | 0.068708 | 2.390905 | 0.000668 | 0.001363 |
| MDGA2       | 0.035244 | 0.140978 | 2.00004  | 2.51E-10 | 2.08E-09 |
| CNTNAP4     | 0.117296 | 0.381568 | 1.701787 | 9.77E-08 | 4.62E-07 |
| EPHB6       | 0.917304 | 2.158573 | 1.234607 | 3.66E-06 | 1.23E-05 |
| GYS2        | 16.77404 | 8.214798 | -1.02993 | 8.45E-11 | 7.89E-10 |
| TMCC1-DT    | 0.172577 | 0.376793 | 1.126528 | 1.64E-12 | 2.26E-11 |
| GLYATL2     | 0.013964 | 0.042891 | 1.61896  | 2.07E-06 | 7.35E-06 |
| LINC00943   | 0.014719 | 0.045634 | 1.632405 | 1.40E-07 | 6.39E-07 |
| DYDC1       | 0.03801  | 0.08175  | 1.104844 | 0.002106 | 0.003862 |
| TPM2        | 7.663524 | 16.88595 | 1.139743 | 1.49E-07 | 6.77E-07 |
| RPS6KA6     | 0.044157 | 0.101752 | 1.204336 | 0.007419 | 0.012    |
| MLLT11      | 1.059777 | 2.346984 | 1.147047 | 1.85E-05 | 5.31E-05 |
| EGF         | 0.143558 | 0.346474 | 1.271113 | 0.000239 | 0.000536 |
| KBTBD11-OT1 | 0.110332 | 0.052525 | -1.07076 | 2.05E-06 | 7.29E-06 |
| LINC00323   | 0.027271 | 0.072752 | 1.415616 | 0.007174 | 0.011635 |
| BECN2       | 0.013878 | 0.044627 | 1.685057 | 1.11E-07 | 5.17E-07 |
| KIF20A      | 1.496296 | 4.456665 | 1.574569 | 1.59E-22 | 2.15E-20 |
| AQP1        | 49.02188 | 18.65939 | -1.39352 | 0.000282 | 0.000622 |
| NAP1L3      | 0.185038 | 0.407751 | 1.139867 | 8.85E-05 | 0.000218 |
| KAZALD1     | 0.530083 | 1.328197 | 1.325181 | 1.17E-08 | 6.78E-08 |
| LINC01666   | 0.127168 | 0.326264 | 1.359297 | 2.81E-05 | 7.71E-05 |
| FGF9        | 0.0086   | 0.065633 | 2.932077 | 0.000107 | 0.00026  |
| CYP4F23P    | 0.106599 | 0.215204 | 1.013512 | 7.10E-06 | 2.24E-05 |
| SNORA73B    | 0.737231 | 1.53324  | 1.056395 | 5.68E-11 | 5.51E-10 |
| CNGB1       | 0.04094  | 0.150846 | 1.881507 | 0.000574 | 0.001187 |
| YWHAEP1     | 0.078828 | 0.290136 | 1.879954 | 2.51E-06 | 8.74E-06 |
| RPSAP63     | 0.01052  | 0.023098 | 1.134621 | 0.00019  | 0.000435 |
| DRP2        | 0.010485 | 0.034171 | 1.704452 | 1.70E-12 | 2.32E-11 |
| PLOD2       | 7.610629 | 15.41523 | 1.018269 | 5.94E-20 | 4.54E-18 |
| UBE2C       | 6.193763 | 21.00566 | 1.76189  | 2.04E-23 | 3.72E-21 |
| TH2LCRR     | 0.048742 | 0.138145 | 1.502946 | 0.003684 | 0.006397 |
| SLC6A14     | 0.048206 | 0.422808 | 3.132715 | 2.91E-10 | 2.39E-09 |
| KLK1        | 0.025324 | 0.099417 | 1.972956 | 1.51E-06 | 5.50E-06 |
| ZNF676      | 0.132094 | 0.391576 | 1.567721 | 0.000104 | 0.000254 |
| SNORD3B-1   | 0.021417 | 0.079744 | 1.896623 | 3.35E-09 | 2.18E-08 |

|           |          |          |          |          |          |
|-----------|----------|----------|----------|----------|----------|
| CPA4      | 0.062373 | 0.16627  | 1.414526 | 0.011037 | 0.017148 |
| FBN2      | 0.023177 | 0.057678 | 1.315346 | 0.000237 | 0.000532 |
| TSKS      | 0.041927 | 0.149571 | 1.834895 | 0.000206 | 0.00047  |
| LINC01585 | 0.010526 | 0.027521 | 1.386551 | 6.96E-06 | 2.21E-05 |
| BUB1B     | 0.795851 | 2.45534  | 1.625352 | 5.42E-23 | 8.35E-21 |
| ZNF334    | 0.166672 | 0.360735 | 1.113928 | 0.002001 | 0.00369  |
| FAM72A    | 0.093162 | 0.22842  | 1.293883 | 2.21E-19 | 1.56E-17 |
| NLRP2     | 0.205766 | 0.474464 | 1.205294 | 1.67E-06 | 6.04E-06 |
| ZNF781    | 0.122812 | 0.400986 | 1.707104 | 2.91E-12 | 3.76E-11 |
| PRUNE2    | 0.081298 | 0.264937 | 1.704361 | 0.002149 | 0.003933 |
| TRPC3     | 0.042138 | 0.162742 | 1.94939  | 2.20E-06 | 7.77E-06 |
| PSRC1     | 1.083913 | 2.908284 | 1.42392  | 1.54E-27 | 2.23E-24 |
| ADAMTS6   | 0.066869 | 0.15067  | 1.171975 | 1.58E-11 | 1.73E-10 |
| GUCY1B2   | 0.100951 | 0.227669 | 1.173284 | 9.98E-11 | 9.17E-10 |
| RPS2P4    | 0.068872 | 0.14314  | 1.05544  | 0.003425 | 0.005988 |
| TMEM52B   | 0.116439 | 0.289827 | 1.315615 | 9.49E-06 | 2.92E-05 |
| AGR2      | 6.013021 | 18.64841 | 1.632891 | 3.39E-06 | 1.15E-05 |
| DACH2     | 0.019372 | 0.042725 | 1.141104 | 1.62E-09 | 1.14E-08 |
| NT5DC4    | 0.019244 | 0.057777 | 1.586114 | 4.38E-09 | 2.77E-08 |
| S100A1    | 2.055351 | 5.227553 | 1.346751 | 0.00112  | 0.002177 |
| MTRF2     | 0.363929 | 1.100443 | 1.596357 | 9.68E-24 | 1.95E-21 |
| LMO3      | 0.024162 | 0.090541 | 1.905823 | 9.82E-15 | 2.29E-13 |
| IL10      | 0.093094 | 0.189848 | 1.028089 | 0.005559 | 0.009243 |
| SPATA17   | 0.053548 | 0.133264 | 1.315367 | 2.24E-07 | 9.84E-07 |
| EFHC2     | 0.015332 | 0.135149 | 3.139953 | 1.61E-12 | 2.21E-11 |
| NR5A1     | 0.02313  | 0.059833 | 1.371145 | 0.006944 | 0.011288 |
| EPHX4     | 0.090116 | 0.237585 | 1.398589 | 2.91E-08 | 1.55E-07 |
| STOX1     | 0.243895 | 0.593976 | 1.284144 | 3.47E-11 | 3.56E-10 |
| PHC2-AS1  | 0.044356 | 0.115276 | 1.377892 | 7.87E-07 | 3.06E-06 |
| LRCOL1    | 4.11732  | 1.859822 | -1.14654 | 3.39E-08 | 1.78E-07 |
| SNHG26    | 0.173382 | 0.381251 | 1.13679  | 3.38E-08 | 1.77E-07 |
| NPM1P9    | 0.037563 | 0.095658 | 1.34856  | 1.96E-11 | 2.13E-10 |
| CAPN9     | 0.163326 | 0.331964 | 1.02327  | 0.003721 | 0.006455 |
| SLC6A8    | 3.823352 | 8.727808 | 1.190781 | 0.000277 | 0.000612 |
| LAG3      | 1.003906 | 2.375911 | 1.242857 | 1.47E-05 | 4.32E-05 |
| SALL2     | 0.574354 | 1.421217 | 1.307113 | 2.05E-14 | 4.46E-13 |
| LVRN      | 0.015695 | 0.052042 | 1.729341 | 1.17E-05 | 3.51E-05 |
| HTR3A     | 0.035947 | 0.787226 | 4.45283  | 5.11E-05 | 0.000133 |
| PCDH9     | 0.027264 | 0.096181 | 1.818775 | 0.032568 | 0.04547  |
| CASKIN1   | 0.031702 | 0.086687 | 1.451249 | 0.000446 | 0.000944 |
| LINC01361 | 0.007956 | 0.336879 | 5.40404  | 8.34E-11 | 7.80E-10 |
| PCDHA1    | 0.092653 | 0.201943 | 1.124037 | 8.13E-06 | 2.53E-05 |
| AUNIP     | 0.192844 | 0.599617 | 1.63661  | 3.54E-24 | 7.89E-22 |
| HYAL4     | 0.010282 | 0.047465 | 2.206702 | 3.93E-06 | 1.31E-05 |



|            |          |          |          |          |          |
|------------|----------|----------|----------|----------|----------|
| ZBTB12     | 1.209308 | 2.691801 | 1.15439  | 6.95E-18 | 3.34E-16 |
| HOXB8      | 0.024982 | 0.177182 | 2.826278 | 0.009727 | 0.015315 |
| NCAPD2P1   | 0.125242 | 0.540397 | 2.109297 | 9.33E-10 | 6.89E-09 |
| PKIA-AS1   | 0.009784 | 0.067114 | 2.778055 | 8.29E-07 | 3.21E-06 |
| ADAM32     | 0.014065 | 0.040379 | 1.521474 | 0.001055 | 0.002063 |
| RPL34P33   | 0.083542 | 0.216766 | 1.375564 | 0.000283 | 0.000625 |
| CARMIL3    | 0.168444 | 0.34113  | 1.018049 | 0.000404 | 0.000864 |
| OLFM4      | 0.961701 | 4.411668 | 2.197664 | 0.015374 | 0.023101 |
| FOXM1      | 2.14173  | 5.822842 | 1.442947 | 9.87E-19 | 5.92E-17 |
| LINC02416  | 0.0427   | 0.117894 | 1.465171 | 3.85E-05 | 0.000102 |
| AURKBP1    | 0.218706 | 0.104816 | -1.06113 | 0.008064 | 0.012932 |
| ARF4P2     | 0.083743 | 0.256915 | 1.617259 | 6.47E-07 | 2.56E-06 |
| PDE7A-DT   | 0.052777 | 0.120036 | 1.185489 | 7.11E-11 | 6.73E-10 |
| MYADML2    | 0.01275  | 0.039873 | 1.644905 | 2.43E-08 | 1.31E-07 |
| TRPM5      | 0.019381 | 0.067533 | 1.800952 | 2.81E-09 | 1.86E-08 |
| LINC02152  | 0.031436 | 0.134175 | 2.093637 | 7.02E-05 | 0.000177 |
| KBTBD11    | 1.054962 | 0.501186 | -1.07377 | 3.39E-07 | 1.43E-06 |
| ANKRD36BP2 | 0.026868 | 0.079234 | 1.560227 | 0.001251 | 0.002411 |
| DPY19L2P2  | 0.056604 | 0.141055 | 1.317281 | 1.62E-10 | 1.41E-09 |
| FARP1-AS1  | 0.046165 | 0.132217 | 1.518044 | 6.91E-06 | 2.19E-05 |
| IGHG1      | 101.706  | 352.109  | 1.791618 | 0.001424 | 0.002716 |
| SLC30A8    | 0.002401 | 0.096369 | 5.326652 | 1.51E-09 | 1.06E-08 |
| IGHV1-24   | 3.832581 | 14.8074  | 1.949931 | 0.012774 | 0.019547 |
| SPACA7     | 0.153024 | 0.058405 | -1.3896  | 8.81E-05 | 0.000217 |
| LINC01841  | 0.018191 | 0.040593 | 1.157974 | 0.014137 | 0.021426 |
| DPP6       | 0.004404 | 0.012267 | 1.477912 | 9.50E-06 | 2.92E-05 |
| MCM5       | 5.355531 | 11.68658 | 1.125752 | 1.02E-24 | 2.87E-22 |
| RAET1K     | 0.031381 | 0.095113 | 1.59974  | 9.97E-13 | 1.45E-11 |
| CLCN3P1    | 0.015077 | 0.0555   | 1.880098 | 0.0003   | 0.000658 |
| ITPRIPL1   | 0.137742 | 0.298381 | 1.115187 | 1.25E-05 | 3.74E-05 |
| SMTNL2     | 0.048298 | 0.145565 | 1.591627 | 3.85E-05 | 0.000102 |
| RGS22      | 0.006726 | 0.026214 | 1.962581 | 0.006021 | 0.009929 |
| TCF24      | 0.004532 | 0.046285 | 3.352431 | 2.59E-14 | 5.50E-13 |
| RPS26P47   | 0.140911 | 0.298683 | 1.083831 | 0.00441  | 0.007515 |
| HSD11B1    | 258.0507 | 127.7172 | -1.0147  | 5.75E-08 | 2.87E-07 |
| LINC01063  | 0.192714 | 0.405836 | 1.074433 | 1.25E-05 | 3.73E-05 |
| OTOGL      | 0.00729  | 0.024772 | 1.764712 | 0.000126 | 0.000301 |
| ARL14      | 0.743928 | 3.007341 | 2.015254 | 0.000344 | 0.000747 |
| PTGS1      | 0.616528 | 1.277466 | 1.051045 | 6.68E-06 | 2.12E-05 |
| BIRC7      | 0.087863 | 1.107622 | 3.656071 | 2.01E-09 | 1.38E-08 |
| ZNF488     | 0.023284 | 0.053339 | 1.195828 | 1.11E-07 | 5.19E-07 |
| LINC02041  | 0.596879 | 1.608552 | 1.430251 | 2.75E-09 | 1.82E-08 |
| HFM1       | 0.010148 | 0.038262 | 1.91475  | 0.00024  | 0.000538 |
| POLQ       | 0.180849 | 0.521321 | 1.527384 | 1.48E-23 | 2.83E-21 |

|                  |          |          |          |          |          |
|------------------|----------|----------|----------|----------|----------|
| C6orf223         | 0.777348 | 2.691377 | 1.791712 | 2.78E-12 | 3.62E-11 |
| ERFE             | 0.290543 | 0.657172 | 1.177516 | 2.69E-09 | 1.79E-08 |
| FFAR2            | 0.124336 | 0.359645 | 1.532334 | 7.41E-07 | 2.90E-06 |
| NBEAP1           | 0.01126  | 0.038883 | 1.787989 | 0.006533 | 0.010681 |
| LINC01094        | 0.111764 | 0.238691 | 1.09469  | 8.09E-07 | 3.14E-06 |
| SCIN             | 0.063717 | 0.131369 | 1.043878 | 1.79E-05 | 5.16E-05 |
| SOHLH2           | 0.04263  | 0.374583 | 3.135344 | 5.05E-09 | 3.16E-08 |
| VN1R85P          | 0.095936 | 0.321021 | 1.742524 | 2.63E-07 | 1.13E-06 |
| ARHGAP29-<br>AS1 | 0.059392 | 0.15708  | 1.403157 | 0.000947 | 0.001867 |
| PIFO             | 0.046492 | 0.209158 | 2.169537 | 2.26E-13 | 3.82E-12 |
| SPINK4           | 0.105297 | 0.993598 | 3.238204 | 0.000119 | 0.000285 |
| LAMP5            | 0.479045 | 2.361968 | 2.301758 | 3.68E-05 | 9.83E-05 |
| ZNF239           | 0.380887 | 1.088397 | 1.514771 | 3.09E-14 | 6.39E-13 |
| PAFAH1B3         | 7.864026 | 20.1849  | 1.359936 | 1.64E-17 | 7.31E-16 |
| DCAF4L1          | 0.063638 | 0.171305 | 1.428606 | 3.38E-07 | 1.43E-06 |
| MYBPC2           | 0.022446 | 0.162568 | 2.856533 | 4.95E-06 | 1.62E-05 |
| RNASE2           | 0.266916 | 1.299638 | 2.283649 | 4.15E-06 | 1.38E-05 |
| SKA1             | 0.930642 | 3.11114  | 1.741146 | 4.25E-26 | 2.21E-23 |
| RPL18P13         | 0.284753 | 0.813428 | 1.514306 | 2.59E-10 | 2.14E-09 |
| BSND             | 0.010799 | 0.075055 | 2.79706  | 9.21E-13 | 1.36E-11 |
| RNF175           | 0.056575 | 0.141883 | 1.326452 | 0.000145 | 0.000341 |
| DNAJB13          | 0.029754 | 0.072329 | 1.281498 | 1.38E-10 | 1.22E-09 |
| NUDT1            | 3.332228 | 7.169853 | 1.105457 | 4.02E-23 | 6.33E-21 |
| CD27             | 1.085997 | 2.419575 | 1.155733 | 0.00016  | 0.000374 |
| MAGEA12          | 0.728133 | 5.372457 | 2.883309 | 1.15E-10 | 1.04E-09 |
| GLIS1            | 0.016283 | 0.05511  | 1.758989 | 0.001069 | 0.002086 |
| LPAR3            | 0.117656 | 0.336336 | 1.51533  | 0.000314 | 0.000686 |
| LINC02253        | 0.100365 | 0.513281 | 2.354493 | 8.71E-09 | 5.18E-08 |
| PLPP7            | 0.184969 | 0.584476 | 1.659864 | 0.000132 | 0.000313 |
| TGFB2-AS1        | 0.184693 | 0.51946  | 1.491879 | 0.004208 | 0.007205 |
| GSDME            | 0.739933 | 1.532201 | 1.050139 | 8.87E-13 | 1.32E-11 |
| WNT6             | 0.166791 | 0.783529 | 2.231941 | 0.030723 | 0.043094 |
| CDC7             | 0.745627 | 1.987546 | 1.414463 | 2.65E-24 | 6.26E-22 |
| CSTF3-DT         | 0.015627 | 0.037392 | 1.258719 | 4.10E-12 | 5.14E-11 |
| MPP2             | 0.078406 | 0.219501 | 1.4852   | 3.75E-11 | 3.81E-10 |
| RPL32P32         | 0.069708 | 0.171606 | 1.299699 | 9.94E-10 | 7.28E-09 |
| KPNA2            | 12.99762 | 27.09531 | 1.059796 | 4.88E-20 | 3.75E-18 |
| TTK              | 0.592091 | 2.016243 | 1.767779 | 3.33E-24 | 7.56E-22 |
| IGSF3            | 1.581155 | 3.190286 | 1.012707 | 3.03E-12 | 3.90E-11 |
| RLN2             | 0.013395 | 0.037371 | 1.480223 | 0.001683 | 0.003159 |
| SPATA3-AS1       | 0.020672 | 0.059402 | 1.522805 | 3.06E-12 | 3.93E-11 |
| EIF5A2           | 0.877613 | 1.802089 | 1.038013 | 1.66E-07 | 7.48E-07 |
| FRMD5            | 0.0175   | 0.043386 | 1.309854 | 1.33E-12 | 1.88E-11 |

|            |          |          |          |          |          |
|------------|----------|----------|----------|----------|----------|
| NSUN7      | 0.156747 | 0.353059 | 1.171473 | 0.000289 | 0.000636 |
| ISL2       | 0.072184 | 0.383904 | 2.410986 | 1.05E-09 | 7.61E-09 |
| CALCR      | 0.009753 | 0.153011 | 3.971696 | 3.75E-14 | 7.52E-13 |
| RGSL1      | 0.393657 | 0.173643 | -1.18082 | 0.000117 | 0.000282 |
| PAGE1      | 1.695226 | 19.18107 | 3.500134 | 3.64E-16 | 1.16E-14 |
| LINC01597  | 0.006873 | 0.014993 | 1.125312 | 0.001416 | 0.002703 |
| FSIP1      | 0.076158 | 0.194838 | 1.355208 | 3.74E-07 | 1.56E-06 |
| PPP4R3C    | 0.368784 | 0.980681 | 1.411006 | 7.19E-06 | 2.27E-05 |
| CERS3      | 0.005812 | 0.014672 | 1.335857 | 0.002091 | 0.003837 |
| LINC02211  | 0.030529 | 0.255643 | 3.065881 | 8.16E-09 | 4.89E-08 |
| UROC1      | 16.34587 | 7.601672 | -1.10454 | 1.58E-05 | 4.62E-05 |
| PAPLN      | 1.288653 | 3.103659 | 1.268107 | 1.61E-07 | 7.27E-07 |
| NECTIN1-DT | 0.129397 | 0.271725 | 1.070345 | 4.16E-06 | 1.38E-05 |
| PTHLH      | 0.537318 | 2.01562  | 1.907374 | 1.32E-08 | 7.53E-08 |
| TMEM59L    | 0.073851 | 0.179132 | 1.278346 | 0.009527 | 0.015039 |
| EMP3       | 5.171408 | 11.41898 | 1.142805 | 1.53E-06 | 5.56E-06 |
| C16orf89   | 0.117774 | 4.419463 | 5.229778 | 1.89E-06 | 6.76E-06 |
| LINC02475  | 0.112573 | 0.375796 | 1.739083 | 1.35E-08 | 7.69E-08 |
| KCNQ3      | 0.033636 | 0.073398 | 1.125752 | 0.000776 | 0.001559 |
| ZSCAN5DP   | 0.015895 | 0.034283 | 1.108922 | 0.000507 | 0.00106  |
| TFF2       | 1.112789 | 8.189273 | 2.879555 | 1.40E-10 | 1.24E-09 |
| NPAS1      | 0.164459 | 0.509899 | 1.632485 | 2.14E-10 | 1.80E-09 |
| IL17RD     | 0.082035 | 0.181291 | 1.144005 | 0.006727 | 0.010968 |
| SLC27A5    | 65.70058 | 32.57834 | -1.01199 | 4.53E-14 | 8.99E-13 |
| MYOSLID    | 0.021605 | 0.077066 | 1.834708 | 0.000215 | 0.000488 |
| SEMA3E     | 0.079415 | 0.609526 | 2.940198 | 7.73E-15 | 1.84E-13 |
| GABRB1     | 0.016683 | 0.034535 | 1.049677 | 1.27E-05 | 3.77E-05 |
| PIMREG     | 0.323516 | 1.116404 | 1.78695  | 7.13E-15 | 1.72E-13 |
| CENPM      | 2.029164 | 6.475783 | 1.674169 | 1.26E-26 | 1.07E-23 |
| C9         | 123.7752 | 54.23485 | -1.19043 | 0.000978 | 0.001924 |
| HIF1A-AS3  | 0.042657 | 0.100615 | 1.23801  | 0.000415 | 0.000885 |
| ACTA1      | 0.134205 | 0.318487 | 1.246792 | 2.13E-07 | 9.38E-07 |
| OIP5       | 1.061762 | 2.817846 | 1.408133 | 1.09E-20 | 9.46E-19 |
| LINC01833  | 0.111635 | 0.278078 | 1.316706 | 2.08E-05 | 5.89E-05 |
| OR52K3P    | 0.108988 | 0.277017 | 1.345805 | 0.000285 | 0.000627 |
| GAL        | 0.27693  | 0.593795 | 1.100443 | 0.012361 | 0.018973 |
| KCND3      | 2.141947 | 1.057692 | -1.018   | 1.34E-08 | 7.64E-08 |
| NANOS3     | 0.062965 | 0.138498 | 1.137238 | 0.002241 | 0.004088 |
| COL19A1    | 0.005771 | 0.019693 | 1.770885 | 0.013277 | 0.02024  |
| GDF10      | 0.1375   | 0.650351 | 2.241792 | 4.96E-07 | 2.02E-06 |
| KCNA2      | 0.006598 | 0.023516 | 1.833657 | 0.010297 | 0.016113 |
| DPYSL4     | 0.180424 | 0.42044  | 1.220513 | 0.000314 | 0.000686 |
| MIR6797    | 0.246165 | 0.509847 | 1.050435 | 1.64E-06 | 5.94E-06 |
| OSMR-DT    | 0.085362 | 0.171414 | 1.005812 | 2.49E-05 | 6.95E-05 |

|             |          |          |          |          |          |
|-------------|----------|----------|----------|----------|----------|
| THBS1-IT1   | 0.142552 | 0.29835  | 1.065515 | 1.32E-05 | 3.92E-05 |
| LRP12       | 0.268553 | 0.786307 | 1.549886 | 8.46E-10 | 6.31E-09 |
| C17orf99    | 0.014908 | 0.035671 | 1.258695 | 7.88E-10 | 5.92E-09 |
| ARNILA      | 0.038438 | 0.077236 | 1.006735 | 2.92E-07 | 1.25E-06 |
| MIR3150BHG  | 0.009353 | 0.023568 | 1.33334  | 4.79E-07 | 1.95E-06 |
| DNAH17-AS1  | 0.004203 | 0.012709 | 1.596376 | 0.00015  | 0.000352 |
| LYPD6B      | 0.2073   | 0.746741 | 1.848886 | 1.05E-08 | 6.13E-08 |
| SLC25A21    | 0.034183 | 0.083177 | 1.282921 | 3.30E-05 | 8.92E-05 |
| MYH15       | 0.007603 | 0.01952  | 1.360401 | 2.61E-05 | 7.24E-05 |
| LINC02768   | 2.006166 | 0.889993 | -1.17258 | 3.43E-09 | 2.22E-08 |
| LINC02391   | 0.039396 | 0.080571 | 1.032194 | 8.31E-08 | 3.99E-07 |
| BNIP3P10    | 0.039525 | 0.087567 | 1.147617 | 3.09E-09 | 2.03E-08 |
| C4BPA       | 578.5932 | 285.057  | -1.0213  | 3.73E-14 | 7.49E-13 |
| CD177       | 0.106772 | 0.804691 | 2.913906 | 0.00253  | 0.004565 |
| GRASLND     | 0.056609 | 0.196529 | 1.795653 | 4.47E-07 | 1.84E-06 |
| BTG1-DT     | 0.029511 | 0.080834 | 1.453714 | 9.28E-12 | 1.08E-10 |
| GAL3ST4     | 0.585308 | 1.182217 | 1.014227 | 5.81E-05 | 0.000149 |
| PLEKHS1     | 0.162514 | 0.421707 | 1.375674 | 7.57E-08 | 3.68E-07 |
| GABRB3      | 0.278188 | 0.565004 | 1.022201 | 0.002629 | 0.004725 |
| ZNF660      | 0.071551 | 0.165675 | 1.211319 | 1.63E-06 | 5.92E-06 |
| DUXAP8      | 0.105556 | 0.214755 | 1.024679 | 3.40E-11 | 3.50E-10 |
| ZNF66       | 0.073761 | 0.196387 | 1.412771 | 3.24E-12 | 4.14E-11 |
| GPAT2       | 0.227717 | 0.734472 | 1.689467 | 0.003054 | 0.005401 |
| ORC1        | 0.705153 | 2.131822 | 1.596079 | 1.20E-26 | 1.06E-23 |
| FKBP10      | 3.658578 | 13.06117 | 1.835928 | 1.42E-06 | 5.22E-06 |
| IGHV3-30    | 5.52639  | 16.93784 | 1.61584  | 0.024613 | 0.035276 |
| PGLYRP4     | 0.008506 | 0.047687 | 2.487119 | 4.83E-05 | 0.000126 |
| TMEM35A     | 0.031357 | 0.113244 | 1.852587 | 0.000131 | 0.000312 |
| IGFBP3      | 25.6896  | 53.19441 | 1.050091 | 1.22E-08 | 7.03E-08 |
| LINC01605   | 0.101416 | 0.247519 | 1.287252 | 0.007472 | 0.012073 |
| GDPD3       | 0.588737 | 1.263694 | 1.101953 | 7.79E-09 | 4.68E-08 |
| ADGRB2      | 0.079255 | 0.358818 | 2.178671 | 1.26E-05 | 3.76E-05 |
| CYP2B6      | 38.35836 | 18.79803 | -1.02896 | 8.54E-05 | 0.000211 |
| LINC01088   | 0.015897 | 0.035659 | 1.165572 | 1.24E-06 | 4.60E-06 |
| CGAS        | 0.356356 | 0.733373 | 1.04123  | 9.60E-05 | 0.000235 |
| DLX1        | 0.022758 | 0.332711 | 3.869809 | 3.79E-07 | 1.58E-06 |
| HTR1F       | 0.008898 | 0.031767 | 1.83601  | 0.003589 | 0.006247 |
| C19orf84    | 0.028902 | 0.090697 | 1.64986  | 7.13E-07 | 2.79E-06 |
| C16orf95-DT | 0.593111 | 1.353534 | 1.190357 | 1.55E-07 | 7.04E-07 |
| PFKFB4      | 0.396721 | 1.126928 | 1.506198 | 1.67E-18 | 9.41E-17 |
| LPO         | 0.004435 | 0.032421 | 2.86981  | 3.37E-07 | 1.42E-06 |
| KIF18B      | 0.745086 | 2.415452 | 1.696815 | 1.47E-24 | 3.88E-22 |
| KLHL41      | 0.052916 | 0.116078 | 1.133328 | 0.010125 | 0.015863 |
| CFAP92      | 0.023751 | 0.051443 | 1.115015 | 0.002232 | 0.004073 |

|                   |          |          |          |          |          |
|-------------------|----------|----------|----------|----------|----------|
| LINC02323         | 0.081702 | 0.222378 | 1.444572 | 8.09E-09 | 4.84E-08 |
| BRINP3            | 0.042923 | 0.252532 | 2.556634 | 3.14E-09 | 2.05E-08 |
| MYBL2             | 3.147466 | 15.50265 | 2.300252 | 1.18E-30 | 7.97E-27 |
| PTGER4            | 0.628316 | 1.274849 | 1.020763 | 1.21E-06 | 4.52E-06 |
| KRTAP5-7          | 0.048362 | 0.122546 | 1.341389 | 0.007494 | 0.012103 |
| HJURP             | 1.194339 | 3.602775 | 1.592897 | 7.42E-24 | 1.51E-21 |
| CFAP61            | 0.011972 | 0.047794 | 1.997215 | 1.17E-10 | 1.06E-09 |
| E2F8              | 0.541187 | 1.302658 | 1.26726  | 6.37E-17 | 2.38E-15 |
| MMP12             | 1.146765 | 2.489572 | 1.118328 | 1.59E-08 | 8.94E-08 |
| RAD51AP1          | 1.017277 | 2.512215 | 1.304248 | 8.67E-19 | 5.29E-17 |
| MMP16             | 0.036863 | 0.092089 | 1.320847 | 3.98E-06 | 1.33E-05 |
| SGSM1             | 0.128373 | 0.259406 | 1.014866 | 2.07E-05 | 5.88E-05 |
| FRAS1             | 0.363966 | 0.881711 | 1.276502 | 2.22E-07 | 9.76E-07 |
| SBSN              | 0.032289 | 0.344221 | 3.414197 | 4.84E-05 | 0.000127 |
| RASGEF1C          | 0.018774 | 0.053839 | 1.519894 | 0.003856 | 0.00666  |
| ZNF727            | 0.088409 | 0.196456 | 1.151939 | 5.94E-07 | 2.37E-06 |
| PTPRN             | 0.008178 | 0.026474 | 1.694814 | 6.54E-09 | 3.99E-08 |
| TCL6              | 0.014682 | 0.071053 | 2.274872 | 1.69E-11 | 1.85E-10 |
| CDC25A            | 0.52143  | 1.728404 | 1.728895 | 3.72E-26 | 2.16E-23 |
| PRSS2             | 0.178941 | 15.72391 | 6.457336 | 0.016146 | 0.024169 |
| CCDC144NL-<br>AS1 | 0.088176 | 0.261918 | 1.570654 | 3.60E-06 | 1.21E-05 |
| HSPA6             | 2.770011 | 5.899295 | 1.090651 | 5.83E-09 | 3.60E-08 |
| FANCE             | 1.005905 | 2.294123 | 1.189449 | 1.89E-22 | 2.47E-20 |
| CLIC3             | 0.774715 | 1.826149 | 1.237067 | 8.52E-08 | 4.09E-07 |
| CHEK1             | 0.794013 | 1.857673 | 1.226262 | 2.29E-23 | 3.97E-21 |
| LINC02577         | 0.002702 | 0.076171 | 4.817138 | 6.39E-09 | 3.91E-08 |
| SH2D7             | 0.006886 | 0.023639 | 1.779358 | 1.40E-07 | 6.41E-07 |
| C19orf33          | 2.382145 | 4.788434 | 1.007292 | 0.009213 | 0.014589 |
| ZNF860            | 0.035121 | 0.078645 | 1.163022 | 0.000423 | 0.0009   |
| PLCB1             | 0.676066 | 1.499806 | 1.149541 | 3.95E-17 | 1.59E-15 |
| DEPDC1B           | 1.029942 | 2.397388 | 1.2189   | 3.22E-22 | 4.03E-20 |
| KHSRPP1           | 0.010258 | 0.027025 | 1.397546 | 0.000461 | 0.000974 |
| EVX1              | 0.082566 | 0.225268 | 1.448021 | 0.006222 | 0.010227 |
| TENM3             | 0.044852 | 0.162758 | 1.859479 | 0.021249 | 0.030928 |
| PSAPL1            | 0.054458 | 0.142626 | 1.38902  | 0.001093 | 0.00213  |
| NDRG1             | 15.30895 | 36.05293 | 1.235741 | 4.50E-08 | 2.30E-07 |
| TCAM1P            | 0.088843 | 0.240614 | 1.437388 | 0.001042 | 0.002039 |
| GPRC5D            | 0.16502  | 0.365782 | 1.148346 | 2.95E-14 | 6.16E-13 |
| HSD3BP4           | 0.0232   | 0.079181 | 1.771013 | 0.004262 | 0.007286 |
| FOXD1             | 0.037557 | 0.175391 | 2.22343  | 0.000934 | 0.001845 |
| HACD1             | 0.234469 | 0.621927 | 1.407349 | 0.03028  | 0.042523 |
| CDHR4             | 0.016591 | 0.044989 | 1.439117 | 7.21E-07 | 2.82E-06 |
| XRCC2             | 0.304134 | 0.847984 | 1.479328 | 9.57E-23 | 1.39E-20 |

|           |          |          |          |          |          |
|-----------|----------|----------|----------|----------|----------|
| TRAM1L1   | 0.241745 | 0.819412 | 1.761102 | 6.27E-12 | 7.57E-11 |
| GCSAML    | 0.018597 | 0.093741 | 2.333599 | 2.95E-06 | 1.01E-05 |
| LINC00565 | 0.01548  | 0.061201 | 1.983116 | 0.011177 | 0.017343 |
| MRPL45P1  | 0.054005 | 0.127958 | 1.244513 | 4.45E-05 | 0.000117 |
| FGD5P1    | 0.008987 | 0.048228 | 2.424002 | 8.50E-07 | 3.28E-06 |
| ESCO2     | 0.200447 | 0.44757  | 1.158895 | 6.60E-14 | 1.26E-12 |
| HOXD1     | 0.074838 | 0.230134 | 1.620635 | 0.000617 | 0.001268 |
| NCOA7-AS1 | 0.145441 | 0.05522  | -1.39716 | 0.001847 | 0.003434 |
| SZT2-AS1  | 0.030781 | 0.075224 | 1.289171 | 3.46E-10 | 2.78E-09 |
| PPFIA4    | 0.042414 | 0.166376 | 1.971829 | 4.16E-17 | 1.65E-15 |
| ABCG4     | 0.014141 | 0.044839 | 1.664886 | 0.019409 | 0.028496 |
| DDN       | 0.016956 | 0.073454 | 2.115047 | 3.23E-11 | 3.36E-10 |
| CACNG8    | 0.019756 | 0.040007 | 1.017959 | 0.000984 | 0.001935 |
| RGS16     | 3.498616 | 9.001695 | 1.363412 | 0.026839 | 0.038166 |
| TYMS      | 5.795243 | 11.91981 | 1.04042  | 2.16E-17 | 9.36E-16 |
| SPESP1    | 0.433204 | 1.213464 | 1.486012 | 0.000229 | 0.000516 |
| SLC22A8   | 0.044551 | 0.24679  | 2.46976  | 0.000335 | 0.000729 |
| NAALADL1  | 0.703708 | 2.942544 | 2.064015 | 2.00E-09 | 1.37E-08 |
| PCDHA5    | 0.006638 | 0.022276 | 1.746673 | 3.03E-05 | 8.27E-05 |
| CLDN11    | 0.391247 | 0.839809 | 1.101982 | 0.000234 | 0.000527 |
| CCNF      | 0.854644 | 2.119116 | 1.310068 | 2.38E-25 | 9.10E-23 |
| GFY       | 0.008324 | 0.057426 | 2.786391 | 2.61E-09 | 1.74E-08 |
| MARCKSL1  | 27.26708 | 59.92181 | 1.135921 | 4.59E-14 | 9.09E-13 |
| CDH7      | 0.003398 | 0.023469 | 2.787998 | 0.00118  | 0.002287 |
| LRRC39    | 0.23231  | 0.630451 | 1.440332 | 1.52E-08 | 8.59E-08 |
| CDCA2     | 0.339717 | 1.087511 | 1.678625 | 6.00E-22 | 7.13E-20 |
| DUSP13    | 0.088744 | 0.284678 | 1.681615 | 0.000342 | 0.000742 |
| GAD1      | 0.08829  | 0.17911  | 1.020534 | 0.00483  | 0.008144 |
| SLC44A5   | 0.424955 | 1.272347 | 1.582111 | 1.17E-09 | 8.42E-09 |
| PLAU      | 2.390377 | 5.623797 | 1.234306 | 0.000179 | 0.000413 |
| LINC01970 | 0.074532 | 0.177804 | 1.254358 | 7.44E-06 | 2.34E-05 |
| PPIAP34   | 0.102098 | 0.226047 | 1.14667  | 6.00E-06 | 1.93E-05 |
| ZIC2      | 1.128634 | 2.672536 | 1.243631 | 6.62E-10 | 5.03E-09 |
| OSR2      | 0.302642 | 0.873015 | 1.528393 | 8.40E-06 | 2.61E-05 |
| WASF1     | 1.929759 | 4.257836 | 1.1417   | 2.48E-18 | 1.33E-16 |
| ANLN      | 1.179861 | 3.461096 | 1.552612 | 1.20E-20 | 1.02E-18 |
| SPAG5     | 3.5691   | 7.744627 | 1.117635 | 4.22E-17 | 1.66E-15 |
| PPIAP45   | 0.049694 | 0.21665  | 2.124232 | 7.91E-11 | 7.45E-10 |
| CDC20P1   | 0.035968 | 0.094996 | 1.401141 | 3.73E-07 | 1.56E-06 |
| FABP7     | 0.007131 | 0.77211  | 6.758541 | 0.000522 | 0.001089 |
| LINC00622 | 0.154165 | 0.36272  | 1.234383 | 3.44E-08 | 1.80E-07 |
| KCNK2     | 0.077301 | 0.289774 | 1.906365 | 4.35E-06 | 1.44E-05 |
| ARFGEF3   | 0.443436 | 0.890271 | 1.005517 | 1.35E-05 | 3.99E-05 |
| MYBPC3    | 0.020347 | 0.129674 | 2.671967 | 1.21E-05 | 3.63E-05 |

|             |          |          |          |          |          |
|-------------|----------|----------|----------|----------|----------|
| UPK1B       | 0.021951 | 0.127573 | 2.538952 | 0.001659 | 0.003117 |
| TRBV9       | 0.250767 | 0.640748 | 1.353409 | 0.003044 | 0.005386 |
| CD79A       | 1.246988 | 3.714237 | 1.574619 | 0.036107 | 0.0498   |
| C15orf48    | 3.616534 | 7.522155 | 1.056538 | 9.69E-07 | 3.70E-06 |
| ZBED2       | 0.097306 | 0.264745 | 1.444008 | 5.17E-07 | 2.09E-06 |
| VNN2        | 4.469249 | 8.989017 | 1.008131 | 3.86E-07 | 1.61E-06 |
| SLC16A3     | 1.575867 | 4.594133 | 1.543647 | 1.09E-12 | 1.58E-11 |
| ZNF711      | 0.209923 | 0.700992 | 1.739538 | 1.40E-11 | 1.56E-10 |
| RADX        | 0.405988 | 0.837573 | 1.044776 | 3.63E-08 | 1.89E-07 |
| LINC01460   | 0.00522  | 0.020176 | 1.95037  | 0.001515 | 0.002874 |
| SVOPL       | 0.004165 | 0.025169 | 2.595385 | 1.50E-06 | 5.47E-06 |
| POTEE       | 0.002906 | 0.010685 | 1.878309 | 1.96E-07 | 8.72E-07 |
| P3H4        | 2.597819 | 5.541152 | 1.092885 | 1.61E-12 | 2.22E-11 |
| RDM1        | 0.290198 | 0.673772 | 1.215225 | 1.02E-15 | 2.98E-14 |
| CHTF18      | 1.195772 | 2.643699 | 1.144616 | 2.82E-25 | 1.03E-22 |
| PLEKHH2     | 0.148082 | 0.3655   | 1.303477 | 2.24E-08 | 1.22E-07 |
| MAP3K9-DT   | 0.539529 | 1.456115 | 1.432352 | 3.89E-22 | 4.78E-20 |
| ERCC6L      | 0.2082   | 0.603695 | 1.535851 | 1.48E-21 | 1.58E-19 |
| LNCSRLR     | 0.178121 | 0.379257 | 1.090318 | 3.18E-11 | 3.31E-10 |
| C5orf46     | 0.381661 | 0.802606 | 1.072399 | 2.19E-05 | 6.19E-05 |
| HOXA11-AS   | 0.033559 | 0.156184 | 2.218461 | 2.15E-06 | 7.61E-06 |
| IGHVII-78-1 | 0.049493 | 0.121885 | 1.300218 | 1.14E-06 | 4.28E-06 |
| TBX18       | 0.038831 | 0.236861 | 2.608763 | 0.000126 | 0.000301 |
| MYB         | 0.068726 | 0.199709 | 1.538962 | 4.06E-17 | 1.62E-15 |
| CDC45       | 1.242585 | 3.491983 | 1.490702 | 3.39E-25 | 1.11E-22 |
| CPA2        | 0.022863 | 7.193458 | 8.297549 | 9.89E-08 | 4.67E-07 |
| RGS2        | 5.386792 | 15.60871 | 1.534853 | 4.04E-09 | 2.58E-08 |
| BLMH        | 3.452638 | 6.931595 | 1.005488 | 2.70E-11 | 2.85E-10 |
| PSLNR       | 0.018663 | 0.175949 | 3.236903 | 6.58E-12 | 7.90E-11 |
| CLSPN       | 0.204019 | 0.623131 | 1.610832 | 1.87E-19 | 1.34E-17 |
| CFAP74      | 0.028111 | 0.076503 | 1.444407 | 0.000818 | 0.001636 |
| DEPDC1      | 0.454848 | 1.53713  | 1.756782 | 2.60E-24 | 6.21E-22 |
| DNAH3       | 0.012933 | 0.026606 | 1.040686 | 2.69E-13 | 4.46E-12 |
| CHMP1B2P    | 0.018453 | 0.047347 | 1.359455 | 3.83E-07 | 1.59E-06 |
| CHRDL1      | 0.142805 | 0.835824 | 2.549149 | 0.000603 | 0.001241 |
| ROCR        | 0.121295 | 0.279776 | 1.205749 | 0.002205 | 0.004029 |
| NFE4        | 0.053338 | 0.441216 | 3.048253 | 5.56E-06 | 1.80E-05 |
| KHDC1-AS1   | 0.024556 | 0.076613 | 1.641532 | 4.19E-11 | 4.20E-10 |
| PBK         | 1.771614 | 4.389764 | 1.309079 | 2.38E-16 | 7.82E-15 |
| EIF4A2P1    | 0.017976 | 0.036789 | 1.033194 | 0.031889 | 0.0446   |
| FZD2        | 0.411587 | 0.972976 | 1.241205 | 0.000123 | 0.000295 |
| TMEM201     | 1.06747  | 2.228933 | 1.062158 | 9.62E-27 | 8.88E-24 |
| GABRQ       | 0.02936  | 0.112131 | 1.933235 | 4.17E-11 | 4.19E-10 |
| KCNQ1OT1    | 0.017803 | 0.04216  | 1.243753 | 6.13E-14 | 1.18E-12 |

|             |          |          |          |          |          |
|-------------|----------|----------|----------|----------|----------|
| MKRN3       | 0.076438 | 0.187857 | 1.297279 | 4.60E-09 | 2.90E-08 |
| REC114      | 0.025669 | 0.219512 | 3.096213 | 0.005662 | 0.009396 |
| ATP6V1FNB   | 0.158642 | 0.458161 | 1.530083 | 9.98E-07 | 3.79E-06 |
| SOX2        | 0.138027 | 0.704263 | 2.351169 | 0.006346 | 0.010407 |
| MACROH2A2   | 5.818008 | 12.41413 | 1.093386 | 8.80E-06 | 2.72E-05 |
| CCDC196     | 0.531642 | 0.240874 | -1.14218 | 8.29E-10 | 6.21E-09 |
| ULBP1       | 0.057913 | 0.190243 | 1.71587  | 5.11E-06 | 1.66E-05 |
| HHLA2       | 0.067014 | 0.144486 | 1.108406 | 3.22E-09 | 2.10E-08 |
| ARHGAP28    | 0.070111 | 0.206656 | 1.559526 | 8.04E-06 | 2.51E-05 |
| TKTL1       | 0.08908  | 1.871257 | 4.39277  | 7.61E-05 | 0.00019  |
| QPCT        | 0.808236 | 2.306595 | 1.512916 | 6.00E-11 | 5.77E-10 |
| ETV3L       | 0.004936 | 0.011463 | 1.215616 | 7.46E-06 | 2.35E-05 |
| FAM153A     | 0.022783 | 0.06188  | 1.441537 | 0.005875 | 0.009715 |
| H1-3        | 0.032187 | 0.073999 | 1.201021 | 1.08E-07 | 5.05E-07 |
| PIF1        | 0.344102 | 1.026769 | 1.577206 | 6.29E-26 | 2.97E-23 |
| MIR181A2HG  | 0.137993 | 0.380066 | 1.461656 | 6.05E-09 | 3.72E-08 |
| HAVCR1      | 0.417039 | 1.288454 | 1.627388 | 2.24E-10 | 1.88E-09 |
| OACYLP      | 0.015468 | 0.038589 | 1.31885  | 7.58E-05 | 0.00019  |
| GPD1L       | 1.227393 | 2.597797 | 1.081692 | 7.60E-13 | 1.14E-11 |
| RAD51       | 0.650118 | 1.759891 | 1.436713 | 1.76E-24 | 4.53E-22 |
| ZNF878      | 0.052053 | 0.109883 | 1.077915 | 4.08E-12 | 5.13E-11 |
| MUSTN1      | 0.146679 | 0.474463 | 1.693633 | 0.01061  | 0.016566 |
| CDCA8       | 1.872059 | 5.9749   | 1.674288 | 2.32E-28 | 4.70E-25 |
| CCDC192     | 0.046684 | 0.142253 | 1.607468 | 1.15E-09 | 8.33E-09 |
| PDIA2       | 0.663442 | 2.683486 | 2.016065 | 2.33E-12 | 3.08E-11 |
| CCNB1       | 4.927465 | 13.93196 | 1.49948  | 1.94E-25 | 7.72E-23 |
| ACER1       | 0.109112 | 0.02822  | -1.951   | 0.001703 | 0.003194 |
| GRIK2       | 0.049562 | 0.146506 | 1.563642 | 1.12E-06 | 4.19E-06 |
| IL11        | 0.051303 | 0.938312 | 4.192941 | 5.77E-05 | 0.000148 |
| LINC01600   | 0.009055 | 0.026869 | 1.569112 | 3.01E-05 | 8.20E-05 |
| MAGEB2      | 0.255662 | 4.24067  | 4.05198  | 2.13E-12 | 2.84E-11 |
| LINC01436   | 0.916884 | 2.486478 | 1.439293 | 1.77E-05 | 5.12E-05 |
| MXRA8       | 3.117145 | 6.515407 | 1.06363  | 0.012643 | 0.019365 |
| COLEC12     | 0.43798  | 1.002855 | 1.195175 | 2.47E-05 | 6.90E-05 |
| ABCC1       | 1.586506 | 3.211269 | 1.01729  | 1.42E-07 | 6.48E-07 |
| RACGAP1     | 2.270298 | 5.188694 | 1.192489 | 7.80E-21 | 7.14E-19 |
| FIGN        | 0.299012 | 0.698806 | 1.224689 | 5.25E-16 | 1.61E-14 |
| LINC02404   | 0.280806 | 1.090862 | 1.957824 | 2.11E-08 | 1.15E-07 |
| LINC02405   | 0.116305 | 0.264148 | 1.183437 | 4.06E-07 | 1.68E-06 |
| MRPL40P1    | 0.076539 | 0.153425 | 1.003275 | 9.05E-06 | 2.79E-05 |
| FAM135A-AS1 | 0.036064 | 0.086602 | 1.263831 | 9.59E-06 | 2.94E-05 |
| LINC01697   | 0.063961 | 0.220727 | 1.786993 | 6.02E-07 | 2.40E-06 |
| ZNF578      | 0.015109 | 0.038097 | 1.33425  | 3.82E-07 | 1.59E-06 |
| UBE2SP1     | 0.231759 | 0.571268 | 1.301544 | 2.71E-17 | 1.14E-15 |



|           |          |          |          |          |          |
|-----------|----------|----------|----------|----------|----------|
| FADS1     | 7.793605 | 16.65894 | 1.095934 | 2.26E-06 | 7.96E-06 |
| LEFTY2    | 0.013079 | 0.11516  | 3.138263 | 0.001059 | 0.00207  |
| ESR1      | 0.797064 | 0.320873 | -1.3127  | 6.11E-09 | 3.75E-08 |
| LINC00595 | 0.009845 | 0.039441 | 2.002268 | 0.000104 | 0.000252 |
| SPACA6    | 0.202453 | 0.538913 | 1.412466 | 6.47E-06 | 2.06E-05 |
| CACNA1G   | 0.009096 | 0.022665 | 1.317102 | 1.05E-06 | 3.98E-06 |
| CD1A      | 0.12616  | 0.257404 | 1.028787 | 4.70E-05 | 0.000123 |
| RBL1      | 0.651525 | 1.449425 | 1.153589 | 6.15E-23 | 9.32E-21 |
| DBN1      | 4.107448 | 8.287722 | 1.012733 | 5.83E-09 | 3.60E-08 |
| CD109     | 0.946544 | 2.154177 | 1.186396 | 8.43E-08 | 4.05E-07 |
| MSC-AS1   | 0.401839 | 0.845882 | 1.07384  | 0.002429 | 0.004402 |
| LRRC37A6P | 0.093055 | 0.198524 | 1.093157 | 6.45E-07 | 2.55E-06 |
| WDR87     | 0.002312 | 0.010395 | 2.168426 | 4.59E-08 | 2.34E-07 |
| PRR19     | 0.442665 | 0.891562 | 1.01012  | 6.99E-16 | 2.09E-14 |
| CHRNA1    | 0.035945 | 0.663226 | 4.205627 | 8.07E-06 | 2.52E-05 |
| IHO1      | 0.024558 | 0.068954 | 1.489437 | 0.00201  | 0.003704 |
| PES1P1    | 0.040919 | 0.139621 | 1.770663 | 5.70E-08 | 2.84E-07 |
| SLC29A4   | 2.982085 | 6.673381 | 1.162097 | 1.20E-05 | 3.61E-05 |
| FCER1G    | 14.37871 | 31.38289 | 1.126044 | 8.08E-06 | 2.52E-05 |
| ARID3A    | 1.470882 | 4.199683 | 1.513599 | 4.52E-13 | 7.11E-12 |
| HRK       | 0.005462 | 0.071515 | 3.710712 | 8.98E-07 | 3.44E-06 |
| TUBA3E    | 0.095378 | 0.201914 | 1.08201  | 0.000106 | 0.000258 |
| SLC26A9   | 0.064777 | 0.864213 | 3.737835 | 0.000541 | 0.001125 |
| FOLR1     | 0.746217 | 1.495912 | 1.003357 | 1.26E-05 | 3.76E-05 |
| LINC02082 | 0.069212 | 0.187782 | 1.439968 | 7.79E-08 | 3.77E-07 |
| MEG9      | 0.071155 | 0.277531 | 1.963617 | 0.000106 | 0.000258 |
| HOXA10    | 0.496059 | 1.048679 | 1.07999  | 2.00E-06 | 7.12E-06 |
| DZIP1L    | 0.201585 | 0.486339 | 1.270573 | 8.23E-11 | 7.71E-10 |
| IGHGP     | 5.312027 | 11.83885 | 1.156195 | 0.003952 | 0.006808 |
| HNRNPA1P8 | 0.072399 | 0.164368 | 1.182885 | 5.78E-10 | 4.45E-09 |
| MNS1      | 1.355194 | 3.445814 | 1.346345 | 3.32E-05 | 8.96E-05 |
| CAGE1     | 0.01362  | 0.078079 | 2.519245 | 2.99E-06 | 1.02E-05 |
| C12orf42  | 0.013894 | 0.032738 | 1.236539 | 9.84E-10 | 7.21E-09 |
| LINC01829 | 0.011062 | 0.024677 | 1.157493 | 0.000374 | 0.000807 |
| ZNF300P1  | 0.199029 | 0.527523 | 1.406258 | 2.43E-08 | 1.31E-07 |
| RPS20P22  | 0.015641 | 0.040392 | 1.368693 | 0.005741 | 0.009517 |
| CPEB1     | 0.020999 | 0.136156 | 2.69685  | 0.005751 | 0.009532 |
| DIRC3     | 0.020713 | 0.061423 | 1.568244 | 3.53E-07 | 1.48E-06 |
| RAB39B    | 0.064395 | 0.128886 | 1.001065 | 1.01E-05 | 3.10E-05 |
| RGS17     | 0.036283 | 0.101961 | 1.490658 | 9.22E-09 | 5.44E-08 |
| ERVH48-1  | 0.100095 | 0.309626 | 1.62916  | 0.007597 | 0.012248 |
| ZNF716    | 0.046969 | 0.127024 | 1.435318 | 2.14E-07 | 9.43E-07 |
| LINC02466 | 0.01726  | 0.072465 | 2.069808 | 2.13E-10 | 1.80E-09 |
| GRAMD4P8  | 0.015817 | 0.059239 | 1.905036 | 0.003024 | 0.005357 |

|           |          |          |          |          |          |
|-----------|----------|----------|----------|----------|----------|
| GGT2      | 0.016047 | 0.036161 | 1.172157 | 0.000856 | 0.001705 |
| ZNF300    | 0.386782 | 0.938267 | 1.278479 | 3.17E-13 | 5.15E-12 |
| EZH2      | 1.791049 | 4.10796  | 1.197617 | 3.49E-25 | 1.11E-22 |
| TMEM108   | 0.045246 | 0.098773 | 1.126335 | 0.000504 | 0.001056 |
| AMPD1     | 0.018463 | 0.037863 | 1.036147 | 0.000473 | 0.000995 |
| DSC3      | 0.022274 | 0.166387 | 2.901111 | 0.015323 | 0.023028 |
| PTN       | 0.827312 | 3.652168 | 2.14225  | 0.000365 | 0.000788 |
| ALG14-AS1 | 0.0229   | 0.046907 | 1.034432 | 0.018429 | 0.027208 |
| PHF19     | 1.165285 | 2.806303 | 1.267987 | 1.44E-24 | 3.86E-22 |
| ACSL6     | 1.306487 | 0.649815 | -1.00759 | 0.001147 | 0.002225 |
| HMSD      | 0.05807  | 0.154927 | 1.415735 | 0.00034  | 0.000738 |
| PDE6A     | 0.009607 | 0.026166 | 1.445453 | 3.45E-09 | 2.23E-08 |
| LINC01807 | 0.10628  | 0.481725 | 2.180338 | 1.69E-06 | 6.09E-06 |
| SAA2-SAA4 | 61.68478 | 16.90886 | -1.86713 | 2.63E-06 | 9.13E-06 |
| HPCAL4    | 0.008548 | 0.017877 | 1.064526 | 0.001404 | 0.002682 |
| SMC2-DT   | 0.009532 | 0.019218 | 1.011647 | 9.43E-10 | 6.95E-09 |
| EGFL6     | 0.089832 | 0.23495  | 1.387054 | 8.76E-07 | 3.37E-06 |
| CHRNA5    | 0.090517 | 0.181053 | 1.000147 | 0.004617 | 0.007826 |
| DRAXIN    | 0.022131 | 0.054258 | 1.2938   | 2.33E-05 | 6.53E-05 |
| AARD      | 0.010613 | 0.035139 | 1.727305 | 9.26E-05 | 0.000227 |
| C10orf55  | 0.026627 | 0.077228 | 1.536265 | 6.16E-05 | 0.000158 |
| LINC00624 | 0.141615 | 0.30375  | 1.100912 | 0.000676 | 0.001378 |
| SNHG25    | 3.076643 | 7.005266 | 1.187083 | 2.87E-06 | 9.84E-06 |
| FAM72C    | 0.064861 | 0.176578 | 1.444888 | 1.20E-15 | 3.43E-14 |
| BRCA2     | 0.181047 | 0.391545 | 1.11281  | 1.37E-17 | 6.18E-16 |
| PTPRQ     | 0.014376 | 0.043023 | 1.581449 | 4.55E-06 | 1.50E-05 |
| S100A8    | 1.821661 | 9.354641 | 2.360428 | 0.00388  | 0.006697 |
| HCN4      | 0.03565  | 0.083412 | 1.226338 | 0.00116  | 0.00225  |
| LINC01446 | 0.107115 | 0.281759 | 1.395297 | 1.94E-06 | 6.92E-06 |
| TCP10L3   | 0.011134 | 0.033145 | 1.57383  | 0.002016 | 0.003714 |
| BFSP2     | 0.092526 | 0.187778 | 1.021096 | 3.87E-07 | 1.61E-06 |
| CCNA1     | 0.009562 | 0.043996 | 2.201955 | 0.00776  | 0.012491 |
| PLXDC1    | 0.589899 | 1.396566 | 1.243343 | 9.14E-07 | 3.50E-06 |
| LINC02204 | 0.011006 | 0.024349 | 1.145655 | 0.000351 | 0.000761 |
| IGSF1     | 0.53756  | 2.337277 | 2.120331 | 3.88E-07 | 1.61E-06 |
| ZNF665    | 0.061604 | 0.131045 | 1.088957 | 3.92E-10 | 3.12E-09 |
| EGLN3     | 0.767802 | 2.407211 | 1.648556 | 6.12E-12 | 7.42E-11 |
| DNM1      | 0.582698 | 1.284321 | 1.140185 | 1.05E-05 | 3.19E-05 |
| UBE2U     | 0.105345 | 0.227619 | 1.111495 | 0.000684 | 0.001393 |
| SRRM4     | 0.002875 | 0.009537 | 1.730049 | 4.63E-05 | 0.000122 |
| LEFTY1    | 0.324134 | 1.574435 | 2.28017  | 3.68E-05 | 9.83E-05 |
| PACSIN1   | 0.324665 | 0.876033 | 1.432031 | 1.23E-09 | 8.85E-09 |
| GLYATL1   | 18.81646 | 9.001698 | -1.06373 | 9.47E-14 | 1.75E-12 |
| SOCS3-DT  | 0.164076 | 0.441322 | 1.427472 | 2.40E-08 | 1.30E-07 |

|            |          |          |          |          |          |
|------------|----------|----------|----------|----------|----------|
| LGALS17A   | 0.064126 | 0.156114 | 1.283622 | 2.28E-07 | 9.97E-07 |
| CSAG2      | 0.228801 | 0.813649 | 1.830314 | 9.19E-11 | 8.51E-10 |
| HOXC6      | 0.097378 | 0.258513 | 1.40856  | 0.000233 | 0.000524 |
| C18orf54   | 0.141888 | 0.414438 | 1.546399 | 1.43E-22 | 1.95E-20 |
| TTYH1      | 0.206117 | 1.077199 | 2.385746 | 0.000198 | 0.000452 |
| TTLL6      | 0.048331 | 0.13515  | 1.483534 | 0.000276 | 0.000611 |
| EIF3KP1    | 0.02081  | 0.052858 | 1.344817 | 0.00108  | 0.002106 |
| NEK2       | 1.63755  | 4.271804 | 1.383307 | 8.20E-20 | 6.14E-18 |
| NRSN2      | 2.737536 | 7.674791 | 1.48725  | 2.25E-13 | 3.81E-12 |
| H19        | 141.2781 | 327.0696 | 1.21106  | 4.62E-06 | 1.52E-05 |
| KCNMB2-AS1 | 0.32657  | 1.156147 | 1.823859 | 2.90E-13 | 4.75E-12 |
| FEZF1      | 0.047567 | 0.176093 | 1.888314 | 0.011241 | 0.017427 |
| DDX43      | 0.10865  | 0.252113 | 1.214383 | 0.003904 | 0.006733 |
| OOEP       | 0.097458 | 0.23174  | 1.24966  | 0.000346 | 0.00075  |
| LINC00844  | 28.68659 | 14.00782 | -1.03414 | 6.34E-07 | 2.51E-06 |
| BDKRB1     | 0.196688 | 0.49937  | 1.3442   | 5.48E-06 | 1.78E-05 |
| CELF3      | 0.007904 | 0.037945 | 2.263327 | 0.000551 | 0.001145 |
| HCAR1      | 0.024059 | 0.103906 | 2.110651 | 0.00043  | 0.000913 |
| HSPB7      | 0.215137 | 0.697831 | 1.697622 | 0.013458 | 0.020489 |
| PEX5L      | 0.008205 | 0.017074 | 1.05714  | 1.87E-06 | 6.70E-06 |
| BICC1      | 2.578241 | 5.270351 | 1.031512 | 4.91E-06 | 1.60E-05 |
| IGKC       | 87.94485 | 287.2116 | 1.707443 | 0.008413 | 0.013435 |
| LRFN5      | 0.039817 | 0.16277  | 2.03139  | 5.99E-07 | 2.39E-06 |
| HP         | 1759.58  | 794.2995 | -1.14748 | 3.09E-13 | 5.03E-12 |
| CCDC162P   | 0.300356 | 0.712138 | 1.245485 | 6.45E-07 | 2.55E-06 |
| FREM1      | 0.031655 | 0.289801 | 3.194544 | 1.05E-07 | 4.93E-07 |
| ZNF215     | 0.087498 | 0.263601 | 1.591026 | 2.81E-09 | 1.86E-08 |
| ZEB2P1     | 0.020985 | 0.094793 | 2.175389 | 8.38E-08 | 4.03E-07 |
| KIF7       | 0.44653  | 0.920625 | 1.043858 | 1.34E-09 | 9.57E-09 |
| MMP10      | 0.391524 | 1.447065 | 1.885955 | 5.69E-10 | 4.39E-09 |
| HMGB2      | 10.92467 | 24.42118 | 1.160544 | 1.31E-22 | 1.83E-20 |
| SPRY4-AS1  | 0.042096 | 0.096275 | 1.19348  | 1.10E-06 | 4.14E-06 |
| TENT5B     | 0.138269 | 0.392496 | 1.505194 | 7.72E-09 | 4.65E-08 |
| RPL32P20   | 0.184722 | 0.593653 | 1.684267 | 1.20E-07 | 5.55E-07 |
| TAT        | 203.0686 | 100.054  | -1.02119 | 3.49E-11 | 3.58E-10 |
| TRPC1      | 0.25865  | 0.566058 | 1.129952 | 6.14E-13 | 9.42E-12 |
| HES7       | 0.011794 | 0.026888 | 1.188876 | 3.10E-05 | 8.43E-05 |
| ARMC3      | 0.004592 | 0.021494 | 2.226638 | 8.74E-11 | 8.13E-10 |
| STMN1      | 7.572562 | 19.46906 | 1.36233  | 4.08E-26 | 2.20E-23 |
| KLRG2      | 0.007636 | 0.017989 | 1.236194 | 5.67E-05 | 0.000146 |
| PRSS3      | 4.027039 | 9.985383 | 1.310099 | 0.003289 | 0.005773 |
| ZP1        | 0.013773 | 0.042193 | 1.61518  | 0.016232 | 0.024282 |
| PRKG1-AS1  | 0.013443 | 0.04216  | 1.649017 | 7.32E-06 | 2.31E-05 |
| VSIG8      | 0.014385 | 0.050489 | 1.811392 | 0.00065  | 0.001329 |

|            |          |          |          |          |          |
|------------|----------|----------|----------|----------|----------|
| NDRG4      | 0.267512 | 0.989082 | 1.886484 | 0.012135 | 0.01866  |
| GPR173     | 0.069846 | 0.149223 | 1.095214 | 0.020479 | 0.029923 |
| RNF126P1   | 0.103342 | 0.215886 | 1.062845 | 0.000209 | 0.000475 |
| LINC01980  | 0.702013 | 2.840771 | 2.016713 | 1.21E-11 | 1.37E-10 |
| HPSE       | 0.336287 | 0.673105 | 1.001139 | 1.40E-05 | 4.13E-05 |
| SSTR5-AS1  | 0.972681 | 1.9761   | 1.022617 | 0.012378 | 0.018993 |
| CASC15     | 0.066854 | 0.17685  | 1.403439 | 3.77E-06 | 1.26E-05 |
| CHRND      | 0.068342 | 0.278842 | 2.028597 | 0.014189 | 0.021501 |
| VLDLR-AS1  | 0.025865 | 0.081352 | 1.65317  | 0.019235 | 0.02828  |
| CASC20     | 0.05425  | 0.351362 | 2.695261 | 3.22E-14 | 6.61E-13 |
| COL4A5     | 0.667076 | 1.452742 | 1.122855 | 1.83E-06 | 6.57E-06 |
| ANKRD7     | 0.008566 | 0.07222  | 3.075703 | 3.31E-07 | 1.40E-06 |
| LINC01205  | 0.009074 | 0.042992 | 2.244205 | 1.68E-09 | 1.18E-08 |
| MMP3       | 0.089839 | 0.338194 | 1.91244  | 0.004908 | 0.008262 |
| LINC00648  | 0.055713 | 0.369017 | 2.727605 | 3.76E-11 | 3.82E-10 |
| HOXD10     | 0.093355 | 0.282041 | 1.595097 | 8.54E-05 | 0.000211 |
| ZNF486     | 0.170605 | 0.690261 | 2.016486 | 2.89E-10 | 2.37E-09 |
| SLC9A7P1   | 0.075701 | 0.201798 | 1.414527 | 1.76E-07 | 7.86E-07 |
| KCNK9      | 0.110649 | 0.514999 | 2.218577 | 1.69E-13 | 2.96E-12 |
| CYP8B1     | 92.707   | 44.05335 | -1.07343 | 1.78E-09 | 1.23E-08 |
| CDT1       | 2.07297  | 6.17663  | 1.575121 | 1.91E-26 | 1.34E-23 |
| OPN1SW     | 0.938528 | 1.924978 | 1.03637  | 7.35E-15 | 1.76E-13 |
| CD8A       | 1.295663 | 2.732669 | 1.076621 | 0.006505 | 0.010643 |
| GRM1       | 0.004667 | 0.022234 | 2.252061 | 0.00624  | 0.010255 |
| FCGR1CP    | 0.086785 | 0.224946 | 1.37407  | 6.09E-06 | 1.96E-05 |
| PLA2G7     | 2.483998 | 5.620634 | 1.178069 | 0.000103 | 0.00025  |
| CADM3      | 0.094865 | 0.208896 | 1.138832 | 0.000678 | 0.001381 |
| PF4V1      | 0.431276 | 1.496258 | 1.794676 | 0.016594 | 0.024767 |
| RHBDL2     | 0.130229 | 0.322856 | 1.309842 | 5.46E-10 | 4.22E-09 |
| CDKL2      | 0.006591 | 0.018224 | 1.467291 | 0.000438 | 0.000929 |
| FAM228A    | 0.035562 | 0.104153 | 1.550315 | 0.005491 | 0.009142 |
| CSMD3      | 0.002543 | 0.019147 | 2.912737 | 7.74E-10 | 5.82E-09 |
| KLHL30-AS1 | 0.005474 | 0.016548 | 1.595823 | 0.00076  | 0.00153  |
| ENPP3      | 0.88587  | 2.196981 | 1.310356 | 6.51E-05 | 0.000166 |
| LINC02476  | 0.301291 | 0.725721 | 1.268258 | 3.25E-06 | 1.10E-05 |
| TMEM63C    | 0.077097 | 0.234451 | 1.604533 | 6.12E-06 | 1.96E-05 |
| RAB34      | 4.229113 | 9.14145  | 1.112068 | 0.000112 | 0.000269 |
| RNF17      | 0.017774 | 0.223896 | 3.655028 | 3.09E-11 | 3.23E-10 |
| SSTR2      | 0.442757 | 1.203288 | 1.442395 | 3.40E-08 | 1.78E-07 |
| ADH1B      | 302.7286 | 136.359  | -1.15062 | 3.22E-12 | 4.12E-11 |
| TFF1       | 1.639293 | 9.949217 | 2.601509 | 9.38E-06 | 2.89E-05 |
| EYA4       | 0.068365 | 0.142226 | 1.056856 | 1.79E-08 | 9.94E-08 |
| PIRT       | 0.003463 | 0.009167 | 1.404204 | 0.000598 | 0.001233 |
| CCNB2      | 2.153015 | 5.973601 | 1.472242 | 6.97E-23 | 1.04E-20 |

|                    |          |          |          |          |          |
|--------------------|----------|----------|----------|----------|----------|
| FANCD2             | 0.549754 | 1.481935 | 1.430623 | 2.23E-25 | 8.73E-23 |
| FOXC2              | 0.167204 | 0.43471  | 1.378443 | 0.000488 | 0.001025 |
| GPSM2              | 0.429954 | 0.997605 | 1.214287 | 1.63E-20 | 1.37E-18 |
| CSAG3              | 0.50511  | 1.467421 | 1.538613 | 1.43E-11 | 1.59E-10 |
| L1CAM              | 0.037413 | 0.175572 | 2.230461 | 0.003194 | 0.005624 |
| ZNF732             | 0.023049 | 0.079374 | 1.783941 | 5.97E-10 | 4.58E-09 |
| TMEM45A            | 4.117864 | 8.39981  | 1.02846  | 0.000225 | 0.000507 |
| TRPA1              | 0.013319 | 0.082389 | 2.629017 | 0.000483 | 0.001015 |
| COL20A1            | 0.002021 | 0.005889 | 1.542898 | 0.002337 | 0.004246 |
| KIR2DL4            | 0.07408  | 0.166758 | 1.170602 | 0.004924 | 0.008285 |
| ZFHX4-AS1          | 0.09171  | 0.331462 | 1.853701 | 0.000258 | 0.000574 |
| MACIR              | 0.724578 | 1.570772 | 1.11626  | 3.66E-10 | 2.93E-09 |
| INS-IGF2           | 0.372752 | 0.051795 | -2.84734 | 1.27E-05 | 3.78E-05 |
| NPFRR2             | 0.156616 | 1.149369 | 2.87554  | 1.94E-11 | 2.10E-10 |
| CYCSP24            | 0.047469 | 0.104724 | 1.141531 | 1.31E-06 | 4.85E-06 |
| RUNDC3A-AS1        | 0.010532 | 0.024462 | 1.215727 | 7.85E-08 | 3.80E-07 |
| PTGES3L-<br>AARSD1 | 0.005747 | 0.018221 | 1.664691 | 2.19E-07 | 9.62E-07 |
| SLC8A1-AS1         | 0.001924 | 0.008509 | 2.145202 | 1.02E-06 | 3.88E-06 |
| ESPL1              | 0.821961 | 1.907449 | 1.214502 | 1.76E-18 | 9.72E-17 |
| NCAM1              | 0.223314 | 0.494211 | 1.146054 | 0.010733 | 0.016725 |
| KIF3C              | 0.462144 | 1.099561 | 1.250513 | 4.50E-06 | 1.48E-05 |
| IL31RA             | 0.015129 | 0.084462 | 2.480948 | 6.08E-07 | 2.42E-06 |
| AACSP1             | 0.008647 | 0.196719 | 4.507787 | 1.78E-12 | 2.42E-11 |
| COLCA2             | 1.007173 | 2.182475 | 1.115654 | 3.34E-12 | 4.26E-11 |
| B3GALNT1           | 0.454081 | 1.054603 | 1.215679 | 6.83E-11 | 6.49E-10 |
| EREG               | 0.185491 | 0.569435 | 1.618182 | 4.47E-05 | 0.000118 |
| CARD18             | 0.059998 | 0.277486 | 2.209437 | 8.38E-10 | 6.27E-09 |
| RPL10P6            | 3.858901 | 11.56857 | 1.583949 | 0.009477 | 0.014969 |
| FLNC               | 1.71421  | 3.877821 | 1.177702 | 0.001395 | 0.002666 |
| PWWP3B             | 0.296377 | 0.641266 | 1.113489 | 2.21E-06 | 7.79E-06 |
| DDX11              | 0.992181 | 2.092903 | 1.07683  | 6.57E-19 | 4.15E-17 |
| TOMM40P2           | 0.10155  | 0.22206  | 1.128758 | 2.96E-10 | 2.42E-09 |
| TXNDC2             | 0.003432 | 0.007697 | 1.165347 | 0.000897 | 0.001778 |
| IGHV3-35           | 0.088001 | 0.26485  | 1.589584 | 0.000796 | 0.001594 |
| SNHG14             | 0.425912 | 0.856246 | 1.007471 | 1.10E-06 | 4.14E-06 |
| BLM                | 0.358426 | 0.798219 | 1.15511  | 2.91E-19 | 2.00E-17 |
| GOLM2P1            | 0.010204 | 0.036523 | 1.839689 | 2.07E-05 | 5.88E-05 |
| TPRXL              | 0.037778 | 0.160048 | 2.082876 | 4.78E-09 | 3.01E-08 |
| CKMT1A             | 0.074912 | 0.194018 | 1.372922 | 1.01E-10 | 9.26E-10 |
| SLC36A2            | 0.004091 | 0.031047 | 2.924032 | 2.00E-07 | 8.88E-07 |
| ARHGAP28-<br>AS1   | 0.026134 | 0.13667  | 2.386701 | 2.08E-07 | 9.19E-07 |
| CNGB3              | 0.011042 | 0.041924 | 1.924712 | 2.26E-08 | 1.23E-07 |

|                  |          |          |          |          |          |
|------------------|----------|----------|----------|----------|----------|
| NRG3             | 0.081483 | 0.197872 | 1.279992 | 9.34E-06 | 2.88E-05 |
| UBE2E1-AS1       | 0.015808 | 0.043112 | 1.44746  | 2.82E-05 | 7.75E-05 |
| MYBPHL           | 0.167912 | 0.55616  | 1.727793 | 0.001581 | 0.002984 |
| UTS2B            | 0.059278 | 0.291763 | 2.299226 | 1.52E-06 | 5.54E-06 |
| SLC5A5           | 0.0325   | 0.103075 | 1.665193 | 0.003632 | 0.006315 |
| MAP3K15          | 0.034914 | 0.119567 | 1.775922 | 8.63E-09 | 5.13E-08 |
| INSRR            | 0.02648  | 0.071101 | 1.424948 | 0.0097   | 0.015279 |
| HERC2P4          | 0.016553 | 0.044659 | 1.431832 | 3.49E-08 | 1.82E-07 |
| KBTBD12          | 0.016028 | 0.068606 | 2.097748 | 0.000428 | 0.000909 |
| ADAMTS16-DT      | 0.458141 | 1.130567 | 1.303182 | 0.009871 | 0.015514 |
| CYP4F29P         | 0.032939 | 0.19979  | 2.600616 | 0.018675 | 0.027531 |
| TMPOP2           | 0.049905 | 0.116116 | 1.218299 | 1.74E-12 | 2.37E-11 |
| LINC01587        | 0.129056 | 0.623183 | 2.271655 | 2.20E-07 | 9.64E-07 |
| LINC02345        | 0.023048 | 0.061714 | 1.420928 | 1.91E-10 | 1.63E-09 |
| C7orf57          | 0.007622 | 0.018708 | 1.295312 | 0.000513 | 0.001071 |
| LINC00348        | 0.270629 | 0.760347 | 1.490339 | 1.03E-05 | 3.13E-05 |
| CLEC5A           | 0.102563 | 0.235911 | 1.201735 | 4.83E-08 | 2.45E-07 |
| HAP1             | 0.054454 | 0.145303 | 1.415954 | 0.002463 | 0.004456 |
| NUSAP1           | 5.281404 | 12.15823 | 1.20294  | 3.92E-19 | 2.62E-17 |
| RBPJL            | 0.010432 | 2.408965 | 7.851256 | 0.007338 | 0.011882 |
| HENMT1           | 0.688775 | 1.622289 | 1.235925 | 7.57E-05 | 0.000189 |
| PMAIP1           | 0.364009 | 0.757974 | 1.058174 | 6.08E-07 | 2.42E-06 |
| CIDEC            | 1.377566 | 3.483508 | 1.33842  | 3.66E-06 | 1.23E-05 |
| EID3             | 0.272347 | 0.583822 | 1.100084 | 1.19E-07 | 5.53E-07 |
| GPR158           | 0.305574 | 0.615332 | 1.009844 | 3.78E-09 | 2.43E-08 |
| ACP4             | 0.194381 | 0.603273 | 1.633925 | 1.00E-10 | 9.22E-10 |
| ST18             | 0.004796 | 0.044071 | 3.200017 | 2.76E-05 | 7.60E-05 |
| TRPM6            | 0.021119 | 0.062512 | 1.565621 | 0.00325  | 0.005709 |
| JSRP1            | 0.263437 | 0.695801 | 1.40122  | 2.66E-06 | 9.21E-06 |
| CAMKV            | 0.019773 | 0.103359 | 2.386023 | 7.36E-07 | 2.88E-06 |
| ARHGAP31-<br>AS1 | 0.049251 | 0.148703 | 1.594213 | 4.36E-07 | 1.80E-06 |
| IL12A            | 0.06117  | 0.198546 | 1.698571 | 1.07E-14 | 2.47E-13 |
| BPIFA2           | 0.177426 | 0.565339 | 1.671896 | 4.54E-08 | 2.32E-07 |
| CLRN1-AS1        | 0.054395 | 0.023464 | -1.21304 | 0.000284 | 0.000627 |
| GINS4            | 0.356702 | 0.855408 | 1.261894 | 2.66E-14 | 5.63E-13 |
| LINC00205        | 0.899505 | 1.916102 | 1.090971 | 2.05E-17 | 8.96E-16 |
| FCGR3B           | 0.17593  | 1.33374  | 2.922404 | 0.010957 | 0.017035 |
| FER1L5           | 0.01383  | 0.053741 | 1.958179 | 2.06E-13 | 3.53E-12 |
| CKMT1B           | 0.074133 | 0.429691 | 2.535114 | 2.11E-08 | 1.15E-07 |
| LINC00942        | 0.645105 | 2.496149 | 1.952099 | 7.86E-05 | 0.000196 |
| ELOBP2           | 0.08849  | 0.376663 | 2.08968  | 0.001795 | 0.00335  |
| SNAP25-AS1       | 0.284536 | 0.601557 | 1.080093 | 0.001487 | 0.002824 |
| PMPCAP1          | 0.020235 | 0.12345  | 2.608998 | 1.32E-08 | 7.56E-08 |

|           |          |          |          |          |          |
|-----------|----------|----------|----------|----------|----------|
| SYNPO2L   | 0.008516 | 0.031276 | 1.876874 | 0.026241 | 0.037395 |
| DKKL1     | 0.142793 | 0.297472 | 1.05883  | 5.13E-05 | 0.000133 |
| P2RY6     | 0.400888 | 0.973188 | 1.279517 | 2.67E-05 | 7.39E-05 |
| ZNF85     | 0.185384 | 0.469036 | 1.339186 | 2.92E-15 | 7.57E-14 |
| PCDHB1    | 0.003526 | 0.012875 | 1.868593 | 0.004668 | 0.007902 |
| DDN-AS1   | 0.049959 | 0.109588 | 1.133284 | 1.97E-11 | 2.13E-10 |
| NKAIN4    | 0.01674  | 0.152045 | 3.183148 | 2.70E-07 | 1.16E-06 |
| GALNT14   | 0.197241 | 0.449919 | 1.189702 | 0.019348 | 0.028411 |
| MLANA     | 0.102618 | 2.028277 | 4.304905 | 0.009084 | 0.014407 |
| ENTPD3    | 0.064806 | 0.239694 | 1.886989 | 0.000639 | 0.00131  |
| TPX2      | 4.620189 | 13.80975 | 1.579663 | 5.12E-26 | 2.53E-23 |
| HOXC10    | 0.229885 | 0.920039 | 2.000782 | 0.002112 | 0.003871 |
| KIF11     | 1.047717 | 2.865405 | 1.451489 | 5.64E-23 | 8.61E-21 |
| CPA6      | 0.151555 | 0.623705 | 2.041023 | 0.006526 | 0.01067  |
| BIRC5     | 3.333392 | 10.7089  | 1.683748 | 8.92E-25 | 2.55E-22 |
| PNMA5     | 0.289837 | 2.252908 | 2.958476 | 3.64E-07 | 1.53E-06 |
| SCG2      | 0.095774 | 0.230477 | 1.266915 | 0.000342 | 0.000742 |
| TEX41     | 0.089696 | 0.235217 | 1.390879 | 9.14E-09 | 5.40E-08 |
| CSMD1     | 0.068744 | 0.244961 | 1.833248 | 1.60E-08 | 8.96E-08 |
| BARD1     | 0.455342 | 0.959537 | 1.075388 | 1.72E-18 | 9.49E-17 |
| C4orf46   | 0.705711 | 1.429821 | 1.018685 | 3.71E-22 | 4.59E-20 |
| ZWINT     | 4.45081  | 11.36304 | 1.352209 | 9.01E-26 | 3.98E-23 |
| NIPAL4    | 0.009534 | 0.024758 | 1.376787 | 0.000302 | 0.000661 |
| KIF24     | 0.264453 | 0.583383 | 1.141431 | 2.24E-15 | 6.01E-14 |
| DDX43P3   | 0.109108 | 0.538495 | 2.303174 | 9.57E-08 | 4.54E-07 |
| RBX1P2    | 0.168324 | 0.381643 | 1.180987 | 0.000502 | 0.001051 |
| SNORD72   | 0.194882 | 0.4401   | 1.175234 | 1.32E-05 | 3.93E-05 |
| VN1R81P   | 0.17001  | 0.452989 | 1.413858 | 3.78E-08 | 1.96E-07 |
| VN1R51P   | 0.035725 | 0.096497 | 1.433564 | 0.001462 | 0.002783 |
| CCNJL     | 0.156394 | 0.517629 | 1.726733 | 1.69E-05 | 4.90E-05 |
| IGF2BP3   | 0.167577 | 0.895431 | 2.417754 | 1.01E-15 | 2.94E-14 |
| E2F1      | 5.372554 | 12.76413 | 1.248416 | 1.17E-21 | 1.28E-19 |
| FAM182A   | 0.004225 | 0.029567 | 2.806814 | 5.07E-11 | 4.98E-10 |
| WDR49     | 0.005412 | 0.018006 | 1.734232 | 2.06E-05 | 5.84E-05 |
| GNB3      | 0.039517 | 0.080295 | 1.022863 | 1.49E-09 | 1.05E-08 |
| MAFG-DT   | 0.961791 | 1.971767 | 1.035694 | 2.38E-10 | 1.98E-09 |
| KLHL14    | 0.008684 | 0.041633 | 2.261255 | 0.020448 | 0.029881 |
| ZIM2-AS1  | 0.032656 | 0.104679 | 1.680547 | 4.48E-06 | 1.47E-05 |
| EGFEM1P   | 0.023869 | 0.084746 | 1.827993 | 1.22E-07 | 5.65E-07 |
| FSIP2-AS2 | 0.038852 | 0.131395 | 1.757862 | 3.21E-08 | 1.69E-07 |
| ERC2      | 0.014693 | 0.053293 | 1.858834 | 1.42E-11 | 1.59E-10 |
| HLA-DPA3  | 0.134121 | 0.275078 | 1.036307 | 0.007318 | 0.011851 |
| MFFP2     | 0.017425 | 0.051055 | 1.550888 | 5.71E-09 | 3.53E-08 |
| STAP1     | 0.109805 | 0.23655  | 1.1072   | 0.004867 | 0.008201 |

|            |          |          |          |          |          |
|------------|----------|----------|----------|----------|----------|
| CLDN18     | 0.112655 | 0.4058   | 1.848855 | 4.13E-10 | 3.26E-09 |
| IL20RA     | 0.172551 | 0.517315 | 1.584022 | 1.31E-07 | 6.04E-07 |
| RBP2       | 0.224457 | 2.62847  | 3.549715 | 5.04E-06 | 1.65E-05 |
| GPAT2P1    | 0.009142 | 0.068453 | 2.904596 | 0.000351 | 0.00076  |
| NMB        | 3.066128 | 6.917873 | 1.173911 | 3.48E-10 | 2.80E-09 |
| IGLV1-50   | 0.08958  | 0.22103  | 1.302996 | 0.033054 | 0.046069 |
| IGLV1-44   | 8.357566 | 27.23784 | 1.704457 | 0.023532 | 0.033886 |
| CDC20B     | 0.066177 | 0.202695 | 1.614907 | 4.11E-06 | 1.37E-05 |
| IFNG       | 0.11904  | 0.331021 | 1.475475 | 5.68E-05 | 0.000146 |
| PNMA3      | 0.5686   | 2.95935  | 2.379793 | 1.31E-06 | 4.85E-06 |
| GJA3       | 0.015841 | 0.094515 | 2.576842 | 2.56E-08 | 1.37E-07 |
| P2RY4      | 0.025499 | 0.11184  | 2.132936 | 0.000221 | 0.000499 |
| SPATA46    | 0.265435 | 0.102676 | -1.37026 | 0.002968 | 0.005269 |
| PCLAF      | 1.575291 | 3.851484 | 1.289797 | 2.62E-21 | 2.63E-19 |
| TP73       | 0.338746 | 0.715016 | 1.077773 | 2.30E-06 | 8.06E-06 |
| LINC02889  | 0.441844 | 1.370758 | 1.633366 | 0.003915 | 0.006752 |
| ULBP2      | 0.305767 | 1.021707 | 1.740479 | 2.48E-08 | 1.34E-07 |
| TNFAIP6    | 0.417484 | 0.861035 | 1.044349 | 9.81E-09 | 5.75E-08 |
| SLITRK2    | 0.003127 | 0.022906 | 2.872811 | 6.83E-06 | 2.17E-05 |
| ZFP82      | 0.174189 | 0.407114 | 1.224781 | 1.94E-14 | 4.27E-13 |
| ILDR2      | 0.360056 | 0.78749  | 1.129038 | 0.000793 | 0.001588 |
| IGHV1-18   | 9.58029  | 22.69965 | 1.244529 | 0.034133 | 0.047435 |
| MCM10      | 0.352162 | 1.263881 | 1.843551 | 4.12E-26 | 2.20E-23 |
| PI3        | 4.382709 | 8.961277 | 1.031881 | 0.008516 | 0.013582 |
| COL2A1     | 1.979431 | 5.601415 | 1.500706 | 0.000197 | 0.00045  |
| LINC02188  | 0.066102 | 0.318107 | 2.266738 | 0.000141 | 0.000333 |
| TROAP      | 1.239114 | 3.963348 | 1.67741  | 1.89E-26 | 1.34E-23 |
| ZNF793-AS1 | 0.29233  | 0.847471 | 1.535566 | 5.47E-08 | 2.74E-07 |
| PRC1       | 2.245153 | 5.289028 | 1.236189 | 3.43E-20 | 2.74E-18 |
| DLGAP5     | 0.956416 | 2.830536 | 1.565364 | 2.83E-23 | 4.80E-21 |
| FEN1       | 8.426904 | 16.927   | 1.006252 | 5.58E-24 | 1.20E-21 |
| NTNG1      | 0.00175  | 0.034915 | 4.318629 | 9.45E-06 | 2.91E-05 |
| KCNK12     | 0.011577 | 0.053499 | 2.208297 | 5.15E-07 | 2.09E-06 |
| LIN28B     | 0.084    | 1.031361 | 3.618019 | 2.69E-14 | 5.67E-13 |
| TCN1       | 0.180949 | 0.925939 | 2.355334 | 8.85E-05 | 0.000218 |
| UICLM      | 0.345956 | 0.959628 | 1.471885 | 0.01456  | 0.022001 |
| VWA5B2     | 0.06132  | 0.17207  | 1.488562 | 4.62E-09 | 2.92E-08 |
| GTSE1      | 0.704253 | 2.156318 | 1.614404 | 3.48E-23 | 5.60E-21 |
| LINC02882  | 0.457154 | 1.262812 | 1.465888 | 1.15E-06 | 4.32E-06 |
| NPTX2      | 1.924605 | 8.356925 | 2.11841  | 0.002593 | 0.004664 |
| LINC01783  | 0.046774 | 0.111507 | 1.253345 | 0.001957 | 0.003617 |
| HSPA7      | 0.934285 | 3.412777 | 1.869012 | 1.30E-07 | 6.00E-07 |
| SCN5A      | 0.013951 | 0.039823 | 1.513257 | 1.19E-08 | 6.87E-08 |
| KIF2C      | 1.305212 | 5.045023 | 1.950577 | 1.25E-29 | 6.33E-26 |



|                   |          |          |          |          |          |
|-------------------|----------|----------|----------|----------|----------|
| LCN15             | 0.010696 | 0.254529 | 4.572671 | 0.014244 | 0.021566 |
| PLBD1             | 1.455434 | 5.446333 | 1.903836 | 1.15E-11 | 1.31E-10 |
| POTEKP            | 0.007449 | 0.062167 | 3.060972 | 6.32E-10 | 4.83E-09 |
| PRECSIT           | 0.279153 | 0.600932 | 1.106146 | 5.61E-10 | 4.33E-09 |
| LRP4-AS1          | 0.033059 | 0.073497 | 1.15264  | 3.19E-08 | 1.68E-07 |
| SPHK1             | 2.366896 | 8.41836  | 1.830543 | 5.85E-11 | 5.65E-10 |
| MCEMP1            | 0.058029 | 0.162469 | 1.48532  | 4.87E-05 | 0.000127 |
| GNAZ              | 2.118902 | 4.523918 | 1.094256 | 1.37E-10 | 1.22E-09 |
| SERPINE2          | 2.087844 | 4.639641 | 1.152    | 1.15E-05 | 3.46E-05 |
| CPVL              | 4.851436 | 10.84002 | 1.159884 | 3.11E-06 | 1.06E-05 |
| OXCT1             | 0.844234 | 2.166815 | 1.359861 | 6.55E-08 | 3.22E-07 |
| DLX6-AS1          | 0.018142 | 0.057786 | 1.671355 | 0.000439 | 0.000931 |
| SPC24             | 2.556182 | 6.099338 | 1.254662 | 1.81E-21 | 1.91E-19 |
| DLX5              | 0.107558 | 0.488662 | 2.183718 | 0.000113 | 0.000273 |
| ZNF670-<br>ZNF695 | 0.018023 | 0.039234 | 1.122256 | 1.58E-07 | 7.14E-07 |
| ARHGEF2-AS2       | 0.068083 | 0.168972 | 1.311423 | 2.79E-15 | 7.30E-14 |
| MUC15             | 0.163717 | 0.715919 | 2.128592 | 5.45E-10 | 4.22E-09 |
| TDRD1             | 0.032955 | 0.136968 | 2.055269 | 0.004812 | 0.008119 |
| ZAR1L             | 0.008416 | 0.020397 | 1.277214 | 1.74E-06 | 6.28E-06 |
| DPF1              | 0.020775 | 0.072768 | 1.808429 | 1.03E-10 | 9.41E-10 |
| PDCD6IPP1         | 0.0437   | 0.094505 | 1.112743 | 0.008424 | 0.013451 |
| CASC9             | 1.177763 | 3.524424 | 1.581339 | 6.92E-12 | 8.28E-11 |
| CYP3A43           | 1.958811 | 0.859112 | -1.18906 | 7.21E-08 | 3.52E-07 |
| ASNSP1            | 0.334525 | 0.698068 | 1.061252 | 5.16E-08 | 2.60E-07 |
| TUSC3             | 1.407917 | 3.540557 | 1.330414 | 2.42E-05 | 6.77E-05 |
| FMO1              | 1.06235  | 2.199892 | 1.050174 | 3.80E-05 | 0.000101 |
| ZNF296            | 0.532095 | 1.193292 | 1.16519  | 5.37E-14 | 1.05E-12 |
| COL11A1           | 0.132095 | 0.995471 | 2.913804 | 4.30E-06 | 1.42E-05 |
| SMC4              | 1.574328 | 3.247601 | 1.044638 | 6.55E-12 | 7.88E-11 |
| SCGB2A1           | 0.472143 | 1.154025 | 1.28938  | 0.002695 | 0.004831 |
| CDH12             | 0.187894 | 0.564354 | 1.586679 | 6.65E-06 | 2.12E-05 |
| PKMYT1            | 0.762908 | 1.93712  | 1.344333 | 1.48E-21 | 1.58E-19 |
| TRIM67            | 0.033022 | 0.090579 | 1.455735 | 0.000282 | 0.000622 |
| KIF14             | 0.439578 | 0.998496 | 1.183638 | 5.49E-15 | 1.35E-13 |
| CKAP2L            | 0.570806 | 1.539845 | 1.431714 | 1.98E-20 | 1.64E-18 |
| WDR45BP1          | 0.020206 | 0.040612 | 1.007099 | 0.004236 | 0.007247 |
| ZNF354C           | 0.212904 | 0.440987 | 1.050534 | 3.56E-08 | 1.85E-07 |
| TM4SF20           | 3.011901 | 6.422855 | 1.092541 | 0.000525 | 0.001095 |
| S100A5            | 0.020643 | 0.051774 | 1.326572 | 0.000124 | 0.000297 |
| CFHR3             | 37.0088  | 17.93328 | -1.04523 | 1.72E-07 | 7.73E-07 |
| STXBP5-AS1        | 0.043987 | 0.113816 | 1.371553 | 2.05E-08 | 1.12E-07 |
| SAMMSON           | 0.006554 | 0.04301  | 2.714251 | 2.97E-14 | 6.19E-13 |
| BMS1P22           | 0.010808 | 0.03364  | 1.63807  | 1.25E-09 | 8.96E-09 |

|           |          |          |          |          |          |
|-----------|----------|----------|----------|----------|----------|
| PFN2      | 2.408717 | 7.022686 | 1.543758 | 1.17E-06 | 4.38E-06 |
| ACRV1     | 0.028748 | 0.090491 | 1.654325 | 1.01E-19 | 7.50E-18 |
| KRT17     | 0.725904 | 3.335095 | 2.199877 | 1.87E-07 | 8.34E-07 |
| FANCI     | 1.107628 | 2.553396 | 1.204944 | 4.47E-23 | 6.98E-21 |
| TRIM36    | 0.086511 | 0.186183 | 1.105757 | 1.22E-06 | 4.54E-06 |
| OR7E128P  | 0.042417 | 0.115177 | 1.441153 | 4.52E-07 | 1.85E-06 |
| LINC01843 | 2.282909 | 4.618279 | 1.016482 | 1.31E-07 | 6.03E-07 |
| EXO1      | 0.716247 | 1.872449 | 1.386397 | 1.37E-21 | 1.49E-19 |
| DLGAP3    | 0.093305 | 0.187844 | 1.009516 | 5.75E-07 | 2.30E-06 |
| TXLNB     | 0.106384 | 0.27228  | 1.355805 | 1.81E-06 | 6.50E-06 |
| FAM133A   | 0.649629 | 1.656541 | 1.350486 | 5.02E-08 | 2.54E-07 |
| HECW2-AS1 | 0.075909 | 0.232253 | 1.613348 | 0.006474 | 0.0106   |
| UGT1A10   | 0.155061 | 0.957207 | 2.625996 | 3.41E-05 | 9.18E-05 |
| TBC1D30   | 0.360993 | 0.73716  | 1.030006 | 4.10E-08 | 2.11E-07 |
| LINC02086 | 0.018042 | 0.052433 | 1.539093 | 0.016406 | 0.024518 |
| FOXD2-AS1 | 0.902924 | 2.264031 | 1.326217 | 1.08E-16 | 3.85E-15 |
| DUX4L27   | 0.062867 | 0.14205  | 1.176031 | 0.009097 | 0.014427 |
| ART5      | 0.076637 | 0.322046 | 2.071145 | 0.000585 | 0.001207 |
| UGT2B28   | 0.090226 | 0.183449 | 1.023769 | 0.007298 | 0.01182  |
| AKAIN1    | 0.121851 | 0.053155 | -1.19684 | 0.014444 | 0.021838 |
| KCNH7     | 0.019192 | 0.060193 | 1.649094 | 0.000153 | 0.000358 |
| ZNF14     | 0.496791 | 1.126232 | 1.180792 | 8.13E-16 | 2.41E-14 |
| CMKLR2    | 0.069102 | 0.176508 | 1.352937 | 0.007061 | 0.011464 |
| IRGM      | 0.034742 | 0.077633 | 1.159968 | 0.000532 | 0.001108 |
| UAP1L1    | 1.149927 | 2.737338 | 1.251231 | 2.09E-05 | 5.93E-05 |
| GAPDHP33  | 0.018496 | 0.037156 | 1.006424 | 0.00131  | 0.002515 |
| MELTF-AS1 | 0.581907 | 1.351619 | 1.215827 | 3.10E-14 | 6.39E-13 |
| IGLC2     | 44.40334 | 136.6485 | 1.621729 | 0.026343 | 0.037524 |
| AMIGO2    | 0.945789 | 1.942808 | 1.038552 | 4.65E-07 | 1.90E-06 |
| KEL       | 0.22331  | 2.027776 | 3.182776 | 3.83E-05 | 0.000102 |
| CCDC136   | 0.040075 | 0.106985 | 1.416641 | 3.09E-07 | 1.32E-06 |
| SEZ6L     | 0.014445 | 0.232814 | 4.010501 | 0.018278 | 0.027016 |
| TRIM54    | 0.387232 | 1.029792 | 1.411082 | 1.38E-07 | 6.33E-07 |
| FAM225A   | 0.022156 | 0.063605 | 1.521411 | 2.12E-07 | 9.33E-07 |
| PAQR5-DT  | 0.025419 | 0.052607 | 1.049332 | 1.25E-06 | 4.64E-06 |
| LINC02055 | 0.218959 | 0.493828 | 1.17335  | 6.10E-05 | 0.000156 |
| PURG      | 0.0069   | 0.018932 | 1.456149 | 0.012953 | 0.019796 |
| NBEAP2    | 0.23697  | 0.634343 | 1.420557 | 1.98E-11 | 2.14E-10 |
| FAM178B   | 0.082393 | 0.641238 | 2.960273 | 2.38E-11 | 2.54E-10 |
| CHP2      | 0.364723 | 0.848969 | 1.218911 | 1.37E-05 | 4.06E-05 |
| LMNB2     | 3.380833 | 7.747776 | 1.196403 | 5.34E-25 | 1.62E-22 |
| ZNF492    | 0.017025 | 0.108586 | 2.673095 | 4.22E-13 | 6.68E-12 |
| DDIT4L    | 0.275564 | 0.692603 | 1.329643 | 0.009747 | 0.015342 |
| WASIR2    | 0.028303 | 0.088156 | 1.639102 | 3.95E-11 | 3.99E-10 |

|           |          |          |          |          |          |
|-----------|----------|----------|----------|----------|----------|
| TNFRSF13C | 0.145198 | 0.292329 | 1.009567 | 1.02E-05 | 3.11E-05 |
| MFAP2     | 0.500154 | 1.819096 | 1.862777 | 1.49E-08 | 8.43E-08 |
| RGS1      | 3.179569 | 7.25605  | 1.190353 | 3.50E-08 | 1.83E-07 |
| ZNF454    | 0.055787 | 0.135623 | 1.281607 | 1.74E-05 | 5.02E-05 |
| SPOCD1    | 0.062715 | 0.187269 | 1.578222 | 2.62E-05 | 7.24E-05 |
| HCAR3     | 0.066479 | 0.196107 | 1.560669 | 1.24E-05 | 3.70E-05 |
| KLHL30    | 0.124229 | 0.465998 | 1.907323 | 0.003995 | 0.006877 |
| ZNF560    | 0.046129 | 0.184096 | 1.996717 | 1.38E-10 | 1.22E-09 |
| SEMA3A    | 0.069757 | 0.265135 | 1.926309 | 0.000495 | 0.001039 |
| DLX6      | 0.067277 | 0.220924 | 1.715366 | 0.000806 | 0.001614 |
| DOK6      | 0.092268 | 0.230341 | 1.319866 | 0.008879 | 0.014119 |
| C1orf147  | 0.017028 | 0.034817 | 1.031864 | 1.59E-05 | 4.63E-05 |
| CNTN5     | 0.017286 | 0.044377 | 1.360218 | 3.63E-07 | 1.52E-06 |
| C17orf64  | 0.03432  | 0.086276 | 1.329911 | 0.000179 | 0.000413 |
| SP140     | 0.300477 | 0.691426 | 1.20232  | 1.68E-08 | 9.37E-08 |
| RN7SKP287 | 0.045032 | 0.113545 | 1.334229 | 7.12E-06 | 2.25E-05 |
| FBXO43    | 0.221898 | 0.560633 | 1.337159 | 7.25E-18 | 3.46E-16 |
| KIF5A     | 0.01616  | 0.077515 | 2.262061 | 2.73E-15 | 7.17E-14 |
| PAGE2     | 2.849001 | 13.84797 | 2.281146 | 1.26E-09 | 9.02E-09 |
| CRYBB1    | 0.297854 | 4.303712 | 3.852903 | 0.001808 | 0.003369 |
| CNR1      | 0.056314 | 0.349352 | 2.633124 | 0.006301 | 0.010342 |
| PPP1R1B   | 0.261868 | 1.373282 | 2.390719 | 3.53E-06 | 1.19E-05 |
| RMI2      | 1.636345 | 3.92831  | 1.263432 | 1.24E-18 | 7.13E-17 |
| NTMT2     | 0.017293 | 0.06931  | 2.002889 | 1.43E-12 | 2.00E-11 |
| ARL4AP2   | 0.03579  | 0.093206 | 1.380879 | 5.18E-06 | 1.68E-05 |
| RPL39L    | 4.19613  | 8.84413  | 1.075661 | 3.19E-07 | 1.35E-06 |
| RTKN2     | 0.094098 | 0.315756 | 1.746576 | 3.25E-22 | 4.05E-20 |
| KCNN1     | 0.067571 | 0.138267 | 1.032971 | 6.17E-05 | 0.000158 |
| RNF186    | 0.115646 | 0.36726  | 1.667085 | 5.79E-06 | 1.86E-05 |
| ASRGL1    | 0.945804 | 2.47971  | 1.390558 | 6.59E-13 | 1.00E-11 |
| SNRFPF1   | 0.044587 | 0.092242 | 1.048788 | 1.19E-05 | 3.56E-05 |
| SNORD36C  | 0.215595 | 0.452144 | 1.068456 | 1.52E-05 | 4.44E-05 |
| RUNX2     | 0.134083 | 0.272646 | 1.023897 | 0.011807 | 0.018203 |
| LETM2     | 0.085292 | 0.173893 | 1.027712 | 0.000394 | 0.000844 |
| MIR589    | 0.242089 | 0.574204 | 1.246025 | 3.74E-10 | 2.99E-09 |
| ZNF883    | 0.2173   | 0.811456 | 1.900824 | 5.17E-11 | 5.06E-10 |
| LYPD6     | 0.120948 | 0.359116 | 1.570062 | 3.68E-09 | 2.37E-08 |
| TCF19     | 3.626567 | 7.749868 | 1.095567 | 3.40E-18 | 1.76E-16 |
| DLX4      | 0.066448 | 0.143495 | 1.110694 | 2.32E-08 | 1.26E-07 |
| MTMR7     | 0.484475 | 1.216546 | 1.328295 | 2.27E-08 | 1.23E-07 |
| TRAV20    | 0.072829 | 0.186026 | 1.352911 | 0.018914 | 0.027846 |
| FMN2      | 0.011409 | 0.093834 | 3.039965 | 3.54E-07 | 1.49E-06 |
| ZNF738    | 0.192807 | 0.624527 | 1.69561  | 2.44E-19 | 1.70E-17 |
| DEFB132   | 1.098687 | 0.497712 | -1.1424  | 5.29E-08 | 2.66E-07 |

|            |          |          |          |          |          |
|------------|----------|----------|----------|----------|----------|
| LINC02334  | 0.022767 | 0.050079 | 1.137269 | 0.024915 | 0.035684 |
| SLC1A2     | 7.107831 | 3.480432 | -1.03014 | 6.47E-09 | 3.96E-08 |
| RTL1       | 0.006148 | 0.723336 | 6.87839  | 2.83E-08 | 1.51E-07 |
| ZNF826P    | 0.156388 | 0.582846 | 1.897985 | 2.40E-15 | 6.38E-14 |
| TRIM59     | 0.188632 | 0.443189 | 1.232347 | 8.09E-19 | 4.99E-17 |
| NOC2LP1    | 0.106474 | 0.427823 | 2.006518 | 8.55E-11 | 7.98E-10 |
| BRCA1      | 0.633819 | 1.348724 | 1.089451 | 3.71E-18 | 1.91E-16 |
| HUS1B      | 0.061202 | 0.142986 | 1.224227 | 3.04E-14 | 6.31E-13 |
| KCNMB3     | 0.089702 | 0.226449 | 1.335976 | 2.27E-19 | 1.60E-17 |
| POTEF      | 0.009013 | 0.0225   | 1.319868 | 6.20E-05 | 0.000158 |
| GDF11      | 0.377759 | 0.859598 | 1.186197 | 9.51E-09 | 5.60E-08 |
| LINC01615  | 0.077374 | 0.268618 | 1.795639 | 0.014233 | 0.021556 |
| MAGEA3     | 2.021067 | 10.04601 | 2.313434 | 1.02E-10 | 9.36E-10 |
| TNFRSF13B  | 0.042869 | 0.089458 | 1.061268 | 0.006277 | 0.010309 |
| CHAF1B     | 0.774152 | 2.085078 | 1.429412 | 1.93E-24 | 4.88E-22 |
| EIF3EP1    | 0.123279 | 0.282984 | 1.198796 | 2.96E-09 | 1.95E-08 |
| CYP26A1    | 0.987201 | 0.315742 | -1.6446  | 0.000474 | 0.000997 |
| ASPM       | 1.192213 | 2.872754 | 1.268792 | 4.33E-17 | 1.69E-15 |
| FOXO6-AS1  | 0.062051 | 0.197321 | 1.669022 | 1.64E-05 | 4.78E-05 |
| LINC02714  | 0.01818  | 0.105811 | 2.541062 | 4.23E-08 | 2.17E-07 |
| RNF183     | 0.046335 | 0.1577   | 1.767005 | 5.81E-06 | 1.87E-05 |
| MMP11      | 2.444185 | 5.675789 | 1.215467 | 1.18E-10 | 1.06E-09 |
| ANKRD13B   | 0.417855 | 0.912419 | 1.126695 | 1.35E-11 | 1.51E-10 |
| ART3       | 0.052545 | 0.108074 | 1.040394 | 0.000473 | 0.000995 |
| EDIL3-DT   | 0.030564 | 0.084459 | 1.466434 | 0.000686 | 0.001396 |
| LINC02616  | 0.030105 | 0.21014  | 2.803264 | 9.93E-13 | 1.45E-11 |
| ACOT11     | 0.093935 | 0.190847 | 1.022686 | 2.19E-10 | 1.84E-09 |
| HPR        | 243.7297 | 121.1163 | -1.00889 | 6.68E-12 | 8.01E-11 |
| JMJD1C-AS1 | 0.123927 | 0.260961 | 1.074344 | 1.33E-12 | 1.88E-11 |
| CCDC13     | 0.142336 | 1.164996 | 3.032957 | 0.012185 | 0.018727 |
| FSTL5      | 0.141788 | 0.480868 | 1.761908 | 3.09E-09 | 2.03E-08 |
| ARMCX2     | 0.691826 | 1.450066 | 1.067639 | 0.031407 | 0.043977 |
| RPS27AP6   | 0.047958 | 0.103118 | 1.104442 | 4.60E-05 | 0.000121 |
| TCP10L2    | 0.020866 | 0.050885 | 1.286109 | 0.001238 | 0.002389 |
| GNAO1-DT   | 0.076988 | 0.035102 | -1.13307 | 3.27E-05 | 8.83E-05 |
| S100A9     | 17.69841 | 77.98703 | 2.139614 | 0.000407 | 0.000869 |
| TRIM46     | 0.087504 | 0.207007 | 1.242268 | 9.35E-09 | 5.51E-08 |
| ZNF98      | 0.008199 | 0.088144 | 3.426285 | 1.97E-10 | 1.68E-09 |
| EFS        | 0.275084 | 0.643255 | 1.225521 | 0.010308 | 0.016129 |
| LINC01529  | 0.047868 | 0.137223 | 1.519401 | 5.85E-08 | 2.91E-07 |
| CHST11     | 1.1399   | 2.734446 | 1.262341 | 3.41E-09 | 2.21E-08 |
| CCNI2      | 0.059858 | 0.141282 | 1.238953 | 1.89E-09 | 1.30E-08 |
| HAGLR      | 0.81713  | 2.224636 | 1.444931 | 0.00076  | 0.00153  |
| SKA3       | 0.799693 | 2.310542 | 1.530714 | 4.36E-24 | 9.51E-22 |

|            |          |          |          |          |          |
|------------|----------|----------|----------|----------|----------|
| SMC1B      | 0.124734 | 0.485404 | 1.960331 | 6.11E-13 | 9.38E-12 |
| MANCR      | 0.056619 | 0.222592 | 1.975048 | 0.014362 | 0.021721 |
| ZNF804A    | 0.043258 | 0.116061 | 1.423829 | 0.001014 | 0.001988 |
| ADGRE3     | 0.032704 | 0.102836 | 1.65281  | 0.032389 | 0.045247 |
| HSPA8P14   | 0.006663 | 0.015567 | 1.224256 | 5.22E-06 | 1.69E-05 |
| RHOXF1-AS1 | 0.127472 | 0.286104 | 1.166367 | 0.006626 | 0.01082  |
| RIBC2      | 0.347541 | 1.263887 | 1.862612 | 4.32E-19 | 2.86E-17 |
| ACKR4      | 0.069118 | 0.14693  | 1.088004 | 0.012969 | 0.019814 |
| COL28A1    | 0.042647 | 0.212123 | 2.314371 | 4.48E-12 | 5.58E-11 |
| ZNF280B    | 0.041977 | 0.093254 | 1.151581 | 0.00018  | 0.000415 |
| LINC02327  | 0.019643 | 0.162021 | 3.044115 | 2.61E-09 | 1.74E-08 |
| RAD54L     | 0.385703 | 1.413831 | 1.874048 | 1.88E-27 | 2.55E-24 |
| HPSE2      | 0.010134 | 0.063352 | 2.644177 | 1.01E-06 | 3.84E-06 |
| LINC01611  | 0.169587 | 0.50334  | 1.569505 | 5.74E-09 | 3.55E-08 |
| EPHA7      | 0.024553 | 0.057759 | 1.234136 | 0.002271 | 0.004137 |
| RPL10P9    | 6.07999  | 15.50389 | 1.35049  | 0.023149 | 0.033388 |
| TRIM45     | 0.670274 | 1.490522 | 1.152995 | 1.36E-17 | 6.17E-16 |
| RFX6       | 0.025204 | 0.133782 | 2.408179 | 3.53E-09 | 2.28E-08 |
| CCL26      | 0.331223 | 0.908927 | 1.456359 | 3.60E-07 | 1.51E-06 |
| LINC01686  | 0.080445 | 0.231962 | 1.527812 | 0.015156 | 0.022806 |
| ZDBF2      | 0.173253 | 0.351834 | 1.022014 | 0.006505 | 0.010643 |
| LINC-ROR   | 0.019177 | 0.092527 | 2.270465 | 5.32E-08 | 2.67E-07 |
| H2AC14     | 0.040023 | 0.118938 | 1.57132  | 3.74E-09 | 2.40E-08 |
| WDR76      | 1.107162 | 2.435759 | 1.137505 | 3.66E-19 | 2.46E-17 |
| CDCA7L     | 1.047641 | 2.484685 | 1.245918 | 3.62E-13 | 5.81E-12 |
| ACTG1P19   | 0.008828 | 0.018636 | 1.077851 | 1.79E-05 | 5.17E-05 |
| MUC5B      | 1.983467 | 5.623558 | 1.503459 | 1.88E-05 | 5.39E-05 |
| COL11A2    | 0.103977 | 1.035458 | 3.315933 | 0.00419  | 0.007179 |
| TMEM18-DT  | 0.024779 | 0.072027 | 1.539441 | 0.00073  | 0.001477 |
| SOBP       | 0.738988 | 1.579052 | 1.095436 | 6.48E-08 | 3.20E-07 |
| SCUBE3     | 0.053033 | 0.148458 | 1.485096 | 0.000109 | 0.000263 |
| LINC01281  | 0.013229 | 0.036647 | 1.469971 | 0.000422 | 0.000897 |
| CDCA3      | 0.763452 | 2.203744 | 1.529347 | 5.56E-25 | 1.66E-22 |
| TRIM60P17  | 0.037545 | 0.095335 | 1.344382 | 1.92E-06 | 6.88E-06 |
| NEIL3      | 0.356206 | 1.095959 | 1.621409 | 1.72E-18 | 9.49E-17 |
| EPHB3      | 0.307855 | 1.130836 | 1.877067 | 8.76E-06 | 2.71E-05 |
| MYLK2      | 0.03016  | 0.112954 | 1.905024 | 2.29E-17 | 9.84E-16 |
| TCEAL2     | 0.026966 | 0.356221 | 3.723541 | 0.021237 | 0.030914 |
| SUN3       | 0.036977 | 0.139987 | 1.920571 | 3.42E-07 | 1.44E-06 |
| ZNF816     | 0.470447 | 0.991039 | 1.07491  | 2.06E-14 | 4.48E-13 |
| TRIM72     | 0.046414 | 0.117258 | 1.337051 | 2.88E-07 | 1.23E-06 |
| TUBB2B     | 0.875664 | 1.875655 | 1.098944 | 3.60E-05 | 9.64E-05 |
| CDIPTOSP   | 0.129099 | 0.263726 | 1.030565 | 6.60E-07 | 2.60E-06 |
| LINC02562  | 0.078398 | 0.312339 | 1.994218 | 2.00E-11 | 2.16E-10 |

|             |          |          |          |          |          |
|-------------|----------|----------|----------|----------|----------|
| CTLA4       | 0.366336 | 0.820251 | 1.162896 | 1.71E-07 | 7.69E-07 |
| NOG         | 0.016518 | 0.038229 | 1.210585 | 0.021784 | 0.031635 |
| PLAC4       | 0.019563 | 0.389768 | 4.316449 | 0.032722 | 0.045659 |
| OR51B5      | 0.020044 | 0.102849 | 2.35932  | 0.003013 | 0.005341 |
| DPY19L2P1   | 0.0041   | 0.016601 | 2.017639 | 0.009496 | 0.014998 |
| ZBED9-AS1   | 0.007249 | 0.024471 | 1.755234 | 1.50E-08 | 8.47E-08 |
| CYP1A1      | 31.20192 | 5.55777  | -2.48906 | 0.001594 | 0.003008 |
| CTSV        | 0.67297  | 2.153058 | 1.677774 | 2.65E-11 | 2.80E-10 |
| CENPU       | 2.264289 | 4.958617 | 1.13088  | 2.07E-17 | 9.01E-16 |
| ZSCAN5B     | 0.013465 | 0.080782 | 2.584842 | 0.000193 | 0.000442 |
| HMMR        | 1.481776 | 3.485241 | 1.233931 | 8.51E-18 | 4.03E-16 |
| SNHG28      | 0.086962 | 0.18589  | 1.095984 | 0.000221 | 0.0005   |
| VIPR2       | 0.017785 | 0.133336 | 2.906304 | 3.35E-06 | 1.13E-05 |
| POU5F2      | 0.002508 | 0.005086 | 1.019862 | 2.60E-06 | 9.04E-06 |
| TDRD5       | 0.027034 | 0.209337 | 2.952972 | 3.12E-09 | 2.04E-08 |
| BOLA3-AS1   | 0.146322 | 0.319637 | 1.127289 | 1.65E-06 | 5.97E-06 |
| TMC6        | 1.836174 | 3.780285 | 1.041792 | 4.16E-07 | 1.72E-06 |
| CABYR       | 1.378687 | 2.90054  | 1.073026 | 0.002517 | 0.004541 |
| LINC02335   | 0.142839 | 0.450047 | 1.655686 | 3.41E-08 | 1.79E-07 |
| ZIC5        | 0.277559 | 0.778401 | 1.487721 | 7.31E-10 | 5.52E-09 |
| LMX1A       | 0.015383 | 0.08148  | 2.405118 | 1.69E-05 | 4.89E-05 |
| PCDH10      | 0.002801 | 0.015666 | 2.483602 | 0.000487 | 0.001022 |
| MCM6        | 5.115675 | 11.39958 | 1.155985 | 2.24E-24 | 5.55E-22 |
| LINC02864   | 0.132501 | 0.632817 | 2.255785 | 1.29E-13 | 2.31E-12 |
| IL12A-AS1   | 0.005313 | 0.020057 | 1.916659 | 4.35E-08 | 2.23E-07 |
| ZNF534      | 0.01235  | 0.084957 | 2.782205 | 8.34E-09 | 4.98E-08 |
| UBE2T       | 5.594391 | 12.54355 | 1.164893 | 3.74E-21 | 3.65E-19 |
| MIXL1       | 0.025758 | 0.112164 | 2.122543 | 1.58E-08 | 8.88E-08 |
| ASIC4       | 0.00666  | 0.020977 | 1.655127 | 2.91E-08 | 1.55E-07 |
| BAGE2       | 0.036857 | 0.207916 | 2.495997 | 3.41E-08 | 1.79E-07 |
| GLYAT       | 29.73382 | 12.86168 | -1.20903 | 4.76E-12 | 5.89E-11 |
| PGAM1P7     | 0.030014 | 0.069506 | 1.211501 | 0.0001   | 0.000245 |
| GSTT2B      | 1.820556 | 3.924165 | 1.108006 | 0.001605 | 0.003026 |
| TRIM60P18   | 0.4615   | 0.93216  | 1.014247 | 3.67E-13 | 5.88E-12 |
| ARHGAP33    | 0.810401 | 1.644841 | 1.02124  | 1.52E-17 | 6.81E-16 |
| TRBV4-1     | 0.184878 | 0.398175 | 1.106826 | 0.002302 | 0.004188 |
| STK31       | 0.03105  | 0.111297 | 1.841778 | 4.63E-07 | 1.89E-06 |
| HILPDA      | 1.79479  | 4.867878 | 1.439478 | 2.59E-17 | 1.10E-15 |
| SEN3-EIF4A1 | 0.007525 | 0.015185 | 1.012999 | 5.33E-06 | 1.73E-05 |
| CHST6       | 0.021057 | 0.049103 | 1.22151  | 8.30E-05 | 0.000206 |
| VCX         | 0.091005 | 0.577035 | 2.664636 | 2.26E-12 | 3.00E-11 |
| LINC01322   | 0.054539 | 0.128566 | 1.237157 | 5.32E-05 | 0.000138 |
| FCN3        | 5.465571 | 2.702823 | -1.01591 | 0.013459 | 0.020489 |
| FCRLA       | 0.167728 | 1.038829 | 2.630765 | 0.000239 | 0.000537 |

|           |          |          |          |          |          |
|-----------|----------|----------|----------|----------|----------|
| STAR      | 0.086474 | 0.248772 | 1.52449  | 2.82E-05 | 7.73E-05 |
| PATJ-DT   | 0.074099 | 0.159196 | 1.103286 | 1.95E-08 | 1.07E-07 |
| G2E3-AS1  | 0.028298 | 0.257983 | 3.188488 | 6.44E-17 | 2.40E-15 |
| BNIP3P11  | 0.278845 | 0.602378 | 1.111209 | 2.64E-15 | 6.97E-14 |
| FSIP2     | 0.014547 | 0.046021 | 1.661606 | 1.86E-08 | 1.03E-07 |
| GAPDHP14  | 0.187109 | 0.591504 | 1.660511 | 2.43E-05 | 6.80E-05 |
| DPY19L2   | 0.036481 | 0.084189 | 1.206495 | 0.012401 | 0.019024 |
| MZB1      | 1.339737 | 4.152278 | 1.631953 | 0.008389 | 0.013405 |
| KY        | 0.00403  | 0.017576 | 2.124662 | 2.91E-05 | 7.96E-05 |
| PDZD7     | 0.046241 | 0.10806  | 1.224581 | 4.25E-11 | 4.26E-10 |
| IL2RA     | 0.295579 | 0.611296 | 1.04833  | 1.33E-06 | 4.92E-06 |
| FAM181B   | 0.008651 | 0.023486 | 1.440839 | 0.021799 | 0.031653 |
| FBLL1     | 0.731912 | 1.634282 | 1.158915 | 9.61E-07 | 3.67E-06 |
| MSC       | 3.474064 | 14.81655 | 2.092514 | 9.25E-06 | 2.85E-05 |
| LINC01952 | 0.101997 | 0.266601 | 1.386162 | 2.66E-10 | 2.19E-09 |
| ATAD5     | 0.294512 | 0.680456 | 1.208177 | 7.67E-22 | 8.95E-20 |
| SCIRT     | 0.445639 | 0.927686 | 1.05776  | 7.06E-14 | 1.34E-12 |
| ASNS      | 1.438234 | 3.742638 | 1.379757 | 3.73E-11 | 3.79E-10 |
| PDGFRL    | 0.487615 | 1.167561 | 1.259685 | 1.99E-09 | 1.37E-08 |
| SRSF12    | 0.140414 | 0.391948 | 1.480972 | 6.16E-16 | 1.86E-14 |
| SLC7A10   | 0.142942 | 1.890493 | 3.725264 | 1.93E-11 | 2.09E-10 |
| POU6F2    | 0.028429 | 0.08348  | 1.554083 | 2.15E-05 | 6.08E-05 |
| MIR4292   | 1.2764   | 2.786965 | 1.126615 | 2.77E-14 | 5.80E-13 |
| LINC00923 | 0.033756 | 0.087402 | 1.372536 | 0.000245 | 0.000548 |
| CYP3A4    | 514.8884 | 175.8981 | -1.54952 | 1.47E-09 | 1.04E-08 |
| ZNF426-DT | 0.251707 | 0.526183 | 1.063821 | 3.75E-08 | 1.95E-07 |
| IMPDH1    | 2.508486 | 6.026219 | 1.264436 | 1.10E-12 | 1.59E-11 |
| EML5      | 0.011496 | 0.023094 | 1.006447 | 0.002855 | 0.005092 |
| SLC10A4   | 0.020638 | 0.110223 | 2.417039 | 0.000838 | 0.001672 |
| ANK2      | 0.104605 | 0.286613 | 1.454153 | 0.010366 | 0.016214 |
| PIANP     | 0.024969 | 0.114046 | 2.191429 | 0.023968 | 0.03446  |
| BNIP3P30  | 0.041328 | 0.164485 | 1.99277  | 1.05E-08 | 6.10E-08 |
| CCT5P1    | 0.007929 | 0.01684  | 1.086729 | 4.46E-07 | 1.83E-06 |
| TREM1     | 0.211882 | 0.459807 | 1.117768 | 6.12E-05 | 0.000157 |
| CSF3R     | 0.415504 | 1.234008 | 1.570416 | 5.46E-05 | 0.000141 |
| ZPLD1     | 0.041172 | 0.945536 | 4.521405 | 1.78E-11 | 1.95E-10 |
| KCTD16    | 0.003218 | 0.015231 | 2.242925 | 0.017579 | 0.0261   |
| CFAP45    | 0.101518 | 0.288052 | 1.504597 | 5.29E-15 | 1.30E-13 |
| FABP3     | 3.082825 | 13.09909 | 2.087141 | 5.72E-07 | 2.29E-06 |
| CCNE1     | 1.364075 | 5.617806 | 2.042084 | 6.22E-18 | 3.03E-16 |
| CRTAM     | 0.16314  | 0.340657 | 1.062214 | 0.019855 | 0.029088 |
| SLC10A1   | 89.36316 | 38.68544 | -1.20789 | 7.52E-15 | 1.80E-13 |
| BANK1     | 0.077785 | 0.251529 | 1.69316  | 0.002598 | 0.004673 |
| TMSB15A   | 0.148329 | 0.641702 | 2.113104 | 7.14E-05 | 0.00018  |

|            |          |          |          |          |          |
|------------|----------|----------|----------|----------|----------|
| PEG10      | 15.60344 | 48.49998 | 1.63612  | 1.53E-11 | 1.69E-10 |
| PLK1       | 1.300353 | 4.227273 | 1.700823 | 3.35E-25 | 1.11E-22 |
| CBY2       | 0.028726 | 0.112883 | 1.974393 | 2.49E-13 | 4.13E-12 |
| LINC01954  | 0.105583 | 0.212345 | 1.00804  | 7.90E-05 | 0.000197 |
| RAB3IL1    | 2.100785 | 4.591209 | 1.127946 | 4.19E-08 | 2.15E-07 |
| GAPDHP59   | 0.044419 | 0.105019 | 1.241421 | 1.60E-07 | 7.22E-07 |
| MUC1       | 1.087563 | 3.094648 | 1.508677 | 0.003659 | 0.006359 |
| ATP5MC1P4  | 0.214722 | 0.709739 | 1.72482  | 6.10E-21 | 5.76E-19 |
| CCDC177    | 0.4484   | 0.155194 | -1.53072 | 0.000303 | 0.000665 |
| BACE2      | 2.878109 | 6.505761 | 1.176597 | 0.003786 | 0.006554 |
| HMGA2-AS1  | 0.002664 | 0.010606 | 1.992902 | 3.81E-05 | 0.000102 |
| ZNF730     | 0.017145 | 0.084311 | 2.297951 | 1.13E-15 | 3.28E-14 |
| TICRR      | 0.171093 | 0.541324 | 1.661715 | 1.45E-26 | 1.13E-23 |
| LINC02802  | 0.152876 | 0.459779 | 1.588581 | 1.10E-07 | 5.14E-07 |
| SP3P       | 0.031008 | 0.160714 | 2.373803 | 3.43E-08 | 1.79E-07 |
| FBXO5      | 0.663135 | 1.537142 | 1.212875 | 5.82E-17 | 2.20E-15 |
| SNORD3B-2  | 0.024231 | 0.071523 | 1.561546 | 0.000155 | 0.000363 |
| HPD        | 764.226  | 297.7992 | -1.35966 | 2.86E-17 | 1.18E-15 |
| HIF1A-AS1  | 0.025762 | 0.075356 | 1.548467 | 0.000242 | 0.000543 |
| CPHL1P     | 0.091465 | 0.465963 | 2.348915 | 4.32E-07 | 1.78E-06 |
| RARRES2P8  | 0.562675 | 1.906865 | 1.760827 | 1.80E-08 | 9.99E-08 |
| PRODH      | 2.371424 | 1.153042 | -1.04031 | 0.000812 | 0.001625 |
| SNORD3A    | 0.027135 | 0.056187 | 1.050077 | 0.000101 | 0.000246 |
| TRPC7-AS1  | 0.098557 | 0.215381 | 1.127857 | 0.000204 | 0.000464 |
| PRKAR2B    | 0.284666 | 0.577208 | 1.01982  | 0.004618 | 0.007826 |
| CARD14     | 0.065537 | 0.166351 | 1.343842 | 1.12E-06 | 4.20E-06 |
| C8orf34    | 0.002303 | 0.013714 | 2.57397  | 0.021264 | 0.030944 |
| FOXJ1      | 0.698916 | 2.142257 | 1.61594  | 4.01E-10 | 3.18E-09 |
| CLDN6      | 0.072598 | 0.402137 | 2.469694 | 0.000566 | 0.001173 |
| MROH3P     | 0.046357 | 0.141856 | 1.613575 | 0.005953 | 0.009828 |
| HK2-DT     | 0.149012 | 0.456237 | 1.614356 | 5.89E-07 | 2.35E-06 |
| COL4A6     | 0.048019 | 0.196609 | 2.03366  | 0.000172 | 0.000398 |
| C1GALT1C1L | 0.093081 | 0.319403 | 1.778821 | 1.18E-05 | 3.55E-05 |
| CYP26B1    | 0.233083 | 1.175759 | 2.334676 | 4.40E-07 | 1.81E-06 |
| STXBP5L    | 0.002146 | 0.008406 | 1.969537 | 2.78E-09 | 1.84E-08 |
| HOXC-AS2   | 0.038124 | 0.080753 | 1.082805 | 0.009803 | 0.015414 |
| SNORD99    | 1.366801 | 2.988584 | 1.128659 | 9.37E-10 | 6.91E-09 |
| MAGEA6     | 1.568133 | 8.180492 | 2.38314  | 5.64E-12 | 6.89E-11 |
| LRRC7      | 0.034728 | 0.081864 | 1.237126 | 0.001522 | 0.002885 |
| LINC02610  | 0.055581 | 0.132653 | 1.254999 | 0.012841 | 0.019641 |
| KRT20      | 1.523117 | 7.085507 | 2.217844 | 0.001261 | 0.00243  |
| FDCSP      | 6.14085  | 16.89063 | 1.459713 | 0.005545 | 0.009221 |
| SLIT1      | 0.029553 | 0.072455 | 1.293791 | 1.66E-07 | 7.47E-07 |
| ASBP1      | 0.275563 | 0.63345  | 1.200848 | 0.008738 | 0.013914 |



|            |          |          |          |          |          |
|------------|----------|----------|----------|----------|----------|
| ERFL       | 0.192223 | 0.60294  | 1.649236 | 0.000154 | 0.00036  |
| TRMT112P4  | 1.401946 | 0.696144 | -1.00997 | 1.05E-09 | 7.66E-09 |
| GAU1       | 0.017882 | 0.070506 | 1.979276 | 0.00023  | 0.000518 |
| CSRNP3     | 0.041611 | 0.105224 | 1.338443 | 7.87E-09 | 4.73E-08 |
| KLK14      | 0.056194 | 0.117499 | 1.064157 | 0.001788 | 0.003338 |
| FAM30A     | 0.032642 | 0.119919 | 1.877272 | 0.011981 | 0.018441 |
| NUF2       | 1.050025 | 3.410263 | 1.699459 | 1.40E-22 | 1.94E-20 |
| SHOC1      | 0.013859 | 0.04323  | 1.641178 | 0.000755 | 0.001523 |
| KRT6B      | 0.130773 | 0.285943 | 1.128664 | 6.46E-07 | 2.56E-06 |
| DCAF4L2    | 1.400565 | 5.267457 | 1.911098 | 3.19E-06 | 1.08E-05 |
| CLRN2      | 0.04567  | 0.021435 | -1.09126 | 3.64E-05 | 9.74E-05 |
| DDX4       | 0.009394 | 0.026621 | 1.502812 | 0.000444 | 0.000941 |
| ORC6       | 0.434413 | 1.273042 | 1.55114  | 3.15E-23 | 5.25E-21 |
| LINC00334  | 0.020763 | 0.046372 | 1.159224 | 8.60E-06 | 2.67E-05 |
| CCDC163    | 0.55554  | 1.21871  | 1.133392 | 1.78E-22 | 2.35E-20 |
| BCAT1      | 0.358737 | 1.087062 | 1.599437 | 1.32E-08 | 7.53E-08 |
| TENM1      | 0.300984 | 0.620714 | 1.044242 | 2.78E-05 | 7.66E-05 |
| UPK1A-AS1  | 0.194626 | 0.497849 | 1.355001 | 4.42E-06 | 1.46E-05 |
| GINS2      | 1.728678 | 3.735365 | 1.11158  | 6.21E-20 | 4.69E-18 |
| FOXP4-AS1  | 0.245248 | 0.622547 | 1.343943 | 0.001649 | 0.003101 |
| PIK3CD-AS1 | 0.013739 | 0.028951 | 1.075335 | 0.000207 | 0.000471 |
| SAPCD2     | 0.538731 | 1.453592 | 1.431986 | 1.84E-16 | 6.26E-15 |
| EGFR-AS1   | 0.433511 | 1.332264 | 1.61974  | 0.005922 | 0.009785 |
| BCL2L12P1  | 0.012495 | 0.041471 | 1.730704 | 1.05E-07 | 4.95E-07 |
| EID2B      | 0.381883 | 0.79148  | 1.051422 | 1.70E-22 | 2.27E-20 |
| SPAG17     | 0.010018 | 0.03245  | 1.695634 | 3.56E-06 | 1.20E-05 |
| SBK3       | 0.120983 | 0.281378 | 1.217711 | 0.000596 | 0.001229 |
| LINC02872  | 0.004568 | 0.018157 | 1.990893 | 0.00294  | 0.005226 |
| MIAT       | 0.093641 | 0.259503 | 1.470542 | 0.002224 | 0.004059 |
| PDCD6IPP2  | 0.028441 | 0.124253 | 2.127253 | 1.22E-05 | 3.65E-05 |
| MKRN4P     | 0.042065 | 0.256567 | 2.608636 | 3.05E-07 | 1.30E-06 |
| NDUFA4L2   | 6.066549 | 15.49845 | 1.353176 | 2.73E-08 | 1.46E-07 |
| MYEF2      | 0.160822 | 0.374638 | 1.220036 | 3.90E-08 | 2.02E-07 |
| ZNF682     | 0.384929 | 0.867382 | 1.172074 | 3.62E-13 | 5.81E-12 |
| GNGT1      | 0.023825 | 0.209846 | 3.13877  | 5.41E-19 | 3.46E-17 |
| OTX1       | 0.203121 | 0.43419  | 1.095988 | 1.93E-08 | 1.06E-07 |
| TMEM255A   | 0.208439 | 0.54289  | 1.381034 | 0.005431 | 0.009052 |
| CUZD1      | 0.063104 | 1.009551 | 3.999829 | 2.08E-13 | 3.55E-12 |
| RSPO4      | 0.040055 | 0.201545 | 2.331055 | 0.007222 | 0.011708 |
| HOXB13     | 0.144776 | 0.469671 | 1.697829 | 2.06E-08 | 1.13E-07 |
| NR0B1      | 0.06003  | 0.822884 | 3.776946 | 1.22E-08 | 7.01E-08 |
| LINC00668  | 0.035232 | 0.204774 | 2.539055 | 5.94E-11 | 5.73E-10 |
| ROR1-AS1   | 0.007322 | 0.029168 | 1.994015 | 1.87E-06 | 6.69E-06 |
| ECT2       | 1.574149 | 3.913601 | 1.313924 | 4.37E-21 | 4.23E-19 |

|           |          |          |          |          |          |
|-----------|----------|----------|----------|----------|----------|
| LINC01901 | 0.024452 | 0.135801 | 2.473492 | 3.42E-08 | 1.79E-07 |
| CTHRC1    | 3.335022 | 6.795548 | 1.026894 | 5.17E-07 | 2.09E-06 |
| SSTR3     | 0.033459 | 0.136206 | 2.02534  | 6.92E-09 | 4.20E-08 |
| CYP4F26P  | 0.02962  | 0.074184 | 1.324525 | 0.002547 | 0.00459  |
| ENTHD1    | 0.009648 | 0.056405 | 2.547498 | 0.000722 | 0.001462 |
| IBSP      | 0.144046 | 1.263911 | 3.133295 | 8.81E-14 | 1.64E-12 |
| OLFML3    | 2.697932 | 6.326943 | 1.229655 | 8.23E-07 | 3.19E-06 |
| CYP1A2    | 42.8636  | 6.980169 | -2.61842 | 4.43E-07 | 1.82E-06 |
| CACNG4    | 1.034877 | 2.643314 | 1.352889 | 0.004233 | 0.007243 |
| COL6A4P1  | 0.008441 | 0.028259 | 1.743176 | 1.01E-14 | 2.35E-13 |
| PYY       | 0.079837 | 0.212162 | 1.410033 | 0.006957 | 0.011308 |
| POU3F2    | 0.025089 | 0.090825 | 1.856047 | 5.22E-09 | 3.25E-08 |
| C12orf56  | 0.022943 | 0.220272 | 3.26318  | 4.06E-14 | 8.12E-13 |
| MMD       | 3.657123 | 8.364898 | 1.193639 | 1.78E-18 | 9.77E-17 |
| EMID1     | 1.748428 | 3.970852 | 1.18339  | 0.00012  | 0.000287 |
| ZNF45-AS1 | 0.209168 | 0.569503 | 1.445038 | 1.46E-10 | 1.28E-09 |
| LINC01882 | 0.077761 | 0.207367 | 1.415064 | 2.19E-06 | 7.73E-06 |
| HOXD4     | 0.075894 | 0.177966 | 1.229555 | 0.020798 | 0.030345 |
| LRP8      | 0.109808 | 0.299329 | 1.446742 | 2.84E-08 | 1.51E-07 |
| C8orf88   | 0.227036 | 0.684956 | 1.593093 | 1.22E-05 | 3.65E-05 |
| MELK      | 1.351298 | 3.766203 | 1.478765 | 1.07E-22 | 1.54E-20 |
| TEX15     | 0.01692  | 0.063186 | 1.900895 | 7.54E-07 | 2.94E-06 |
| DUXAP10   | 0.035643 | 0.080852 | 1.181686 | 8.72E-12 | 1.02E-10 |
| C1orf194  | 0.022665 | 0.047603 | 1.070605 | 1.72E-05 | 4.99E-05 |
| TMSB10P1  | 0.329607 | 0.717597 | 1.122427 | 1.10E-05 | 3.32E-05 |
| DIRAS1    | 0.320916 | 0.684381 | 1.092602 | 0.000665 | 0.001358 |
| MAGEC2    | 2.410759 | 7.792109 | 1.692527 | 5.93E-06 | 1.91E-05 |
| MAGEC1    | 0.538401 | 1.840615 | 1.773434 | 3.43E-05 | 9.23E-05 |
| CSPG4BP   | 0.007356 | 0.023816 | 1.694874 | 3.44E-05 | 9.26E-05 |
| HTR2A-AS1 | 0.058788 | 0.022388 | -1.3928  | 1.94E-09 | 1.34E-08 |
| SLC25A24  | 0.677907 | 1.462704 | 1.109479 | 4.21E-08 | 2.16E-07 |
| NEFM      | 0.007476 | 0.027758 | 1.892591 | 1.83E-05 | 5.27E-05 |
| UBA52P6   | 0.203012 | 0.417442 | 1.040007 | 6.12E-11 | 5.88E-10 |
| ARHGEF2   | 2.159862 | 4.759004 | 1.13972  | 1.25E-17 | 5.75E-16 |
| SKP2      | 3.688396 | 7.6772   | 1.057587 | 2.97E-18 | 1.56E-16 |
| RUNDC3A   | 0.061929 | 0.173757 | 1.488396 | 1.49E-10 | 1.31E-09 |
| GRIA4     | 0.002221 | 0.013328 | 2.585366 | 2.54E-08 | 1.36E-07 |
| CCNA2     | 2.780772 | 7.577609 | 1.446257 | 2.81E-21 | 2.79E-19 |
| SPAG6     | 0.010173 | 0.064615 | 2.667148 | 5.74E-11 | 5.56E-10 |
| MAFA      | 0.556283 | 1.773283 | 1.672531 | 0.000517 | 0.00108  |
| GALNT15   | 0.815087 | 0.406734 | -1.00287 | 5.89E-10 | 4.53E-09 |
| GSTM1     | 29.98425 | 9.45905  | -1.66444 | 0.003428 | 0.005991 |
| CAPN6     | 0.861878 | 2.256231 | 1.38836  | 1.45E-05 | 4.27E-05 |
| SCN1A     | 0.010853 | 0.08163  | 2.911035 | 1.25E-05 | 3.74E-05 |

|             |          |          |          |          |          |
|-------------|----------|----------|----------|----------|----------|
| ELFN1-AS1   | 0.412715 | 1.425695 | 1.788447 | 0.009801 | 0.015413 |
| LRRC74B     | 0.001497 | 0.004922 | 1.716793 | 3.16E-07 | 1.34E-06 |
| FRMD1       | 0.043079 | 0.169533 | 1.976521 | 1.70E-06 | 6.15E-06 |
| TNFRSF11B   | 2.076469 | 4.417651 | 1.089147 | 0.000498 | 0.001044 |
| NEFH        | 0.21116  | 0.437484 | 1.050892 | 2.69E-05 | 7.43E-05 |
| MMS22L      | 0.135339 | 0.31547  | 1.220927 | 4.30E-20 | 3.35E-18 |
| BCYRN1      | 0.027534 | 0.081568 | 1.566807 | 1.53E-06 | 5.57E-06 |
| RPL29P14    | 0.084644 | 0.170967 | 1.01424  | 2.59E-10 | 2.14E-09 |
| SH2D6       | 0.096827 | 0.207097 | 1.096819 | 7.02E-09 | 4.25E-08 |
| C10orf88B   | 0.064966 | 0.225622 | 1.796161 | 2.12E-17 | 9.23E-16 |
| LINC02641   | 0.013285 | 0.047051 | 1.824394 | 2.02E-07 | 8.96E-07 |
| LINC02438   | 0.101584 | 0.283642 | 1.481398 | 1.44E-06 | 5.29E-06 |
| LINC01993   | 0.031624 | 0.083405 | 1.399108 | 0.003119 | 0.005507 |
| CORO6       | 0.109498 | 0.253825 | 1.212933 | 1.08E-05 | 3.28E-05 |
| FANCG       | 1.986879 | 4.076711 | 1.036902 | 2.68E-25 | 1.01E-22 |
| SLCO6A1     | 0.038841 | 0.180837 | 2.219023 | 3.45E-11 | 3.54E-10 |
| MCCD1       | 0.949687 | 3.963778 | 2.061353 | 0.000237 | 0.000533 |
| PLD5        | 0.00979  | 0.264832 | 4.757646 | 0.000906 | 0.001795 |
| SEPTIN14P12 | 0.045936 | 0.133099 | 1.534818 | 3.25E-09 | 2.12E-08 |
| GPR161      | 0.172805 | 0.381702 | 1.143296 | 2.53E-05 | 7.04E-05 |
| GPC2        | 0.064912 | 0.167027 | 1.363524 | 9.97E-14 | 1.83E-12 |
| MALRD1      | 0.008384 | 0.039649 | 2.241571 | 6.61E-10 | 5.03E-09 |
| USH1G       | 0.02474  | 0.059643 | 1.269522 | 0.001207 | 0.002334 |
| MAEL        | 0.215799 | 2.055068 | 3.251424 | 4.38E-05 | 0.000115 |
| NCLP1       | 0.016008 | 0.033258 | 1.054941 | 2.97E-08 | 1.58E-07 |
| STEAP1B     | 0.042121 | 0.265135 | 2.654103 | 1.78E-15 | 4.87E-14 |
| CERS1       | 0.13719  | 0.363281 | 1.404913 | 4.41E-06 | 1.46E-05 |
| RPS7P3      | 0.098116 | 0.196806 | 1.00421  | 9.22E-10 | 6.81E-09 |
| ASB11       | 0.022488 | 0.104633 | 2.218126 | 0.000427 | 0.000907 |
| PPP2R2B     | 0.050386 | 0.175665 | 1.801736 | 9.04E-09 | 5.34E-08 |
| PLAAT5      | 0.037291 | 0.128951 | 1.789912 | 0.00186  | 0.003455 |
| TRHDE       | 0.116717 | 0.3141   | 1.428213 | 3.55E-06 | 1.19E-05 |
| BPIFB4      | 0.069008 | 0.14633  | 1.084398 | 0.005809 | 0.009617 |
| P3H1        | 3.8838   | 8.651326 | 1.155452 | 2.65E-62 | 5.39E-58 |
| CRYBB2      | 0.099525 | 0.209811 | 1.075955 | 0.00012  | 0.000287 |
| CCDC74B     | 0.049693 | 0.103697 | 1.061268 | 1.44E-12 | 2.02E-11 |
| LINC01121   | 0.028687 | 0.080435 | 1.487436 | 1.35E-07 | 6.20E-07 |
| TOMM40P4    | 0.185216 | 0.506448 | 1.451206 | 3.73E-14 | 7.49E-13 |
| NKAIN2      | 0.136387 | 0.402994 | 1.56305  | 2.83E-07 | 1.21E-06 |
| SNHG4       | 0.293852 | 0.62056  | 1.078481 | 4.73E-06 | 1.55E-05 |
| BARX1       | 0.264097 | 0.709783 | 1.426309 | 4.00E-05 | 0.000106 |
| CNTN1       | 0.212405 | 1.019458 | 2.262912 | 0.004629 | 0.007842 |
| NXPH4       | 1.919791 | 4.62451  | 1.268351 | 1.04E-10 | 9.52E-10 |
| DNMT3B      | 0.454375 | 0.981809 | 1.111559 | 4.02E-14 | 8.04E-13 |

|              |          |          |          |          |          |
|--------------|----------|----------|----------|----------|----------|
| PPIAP74      | 0.043576 | 0.096647 | 1.149179 | 0.027738 | 0.039309 |
| IGHV3-43     | 1.282413 | 3.834727 | 1.580263 | 0.004956 | 0.008333 |
| TMC5         | 1.162971 | 2.574191 | 1.146303 | 0.002104 | 0.003859 |
| LY6H         | 0.238909 | 0.484119 | 1.018903 | 2.49E-07 | 1.08E-06 |
| KLHL6-AS1    | 0.64642  | 1.466945 | 1.182271 | 0.007748 | 0.012473 |
| NTRK1        | 0.023437 | 0.086684 | 1.886988 | 8.18E-05 | 0.000203 |
| RNASEH2A     | 6.849911 | 14.14486 | 1.04612  | 2.64E-22 | 3.37E-20 |
| ZNF90        | 0.044819 | 0.280595 | 2.646325 | 4.67E-18 | 2.36E-16 |
| ADH4         | 307.5245 | 148.9895 | -1.04549 | 8.34E-09 | 4.98E-08 |
| NEBL         | 0.377205 | 0.798719 | 1.08234  | 0.015767 | 0.023642 |
| EPO          | 1.016711 | 4.79289  | 2.236986 | 1.90E-09 | 1.31E-08 |
| DSCR8        | 0.317895 | 2.081566 | 2.711045 | 0.000237 | 0.000533 |
| CFAP300      | 0.027943 | 0.072042 | 1.366335 | 4.44E-06 | 1.46E-05 |
| SNORD46      | 0.327315 | 0.673535 | 1.041072 | 1.37E-09 | 9.74E-09 |
| TK1          | 12.90574 | 27.57106 | 1.095142 | 5.67E-18 | 2.80E-16 |
| CELF4        | 0.026462 | 0.101556 | 1.940257 | 2.94E-10 | 2.41E-09 |
| FIRRE        | 0.062752 | 0.147053 | 1.228602 | 2.21E-10 | 1.85E-09 |
| BNIP3P27     | 0.033518 | 0.092304 | 1.461468 | 1.90E-10 | 1.63E-09 |
| PPM1E        | 0.243659 | 0.589364 | 1.274298 | 0.00041  | 0.000875 |
| RAB38        | 0.332674 | 0.854445 | 1.36088  | 9.09E-09 | 5.37E-08 |
| SLC25A5P5    | 0.055168 | 0.161033 | 1.545464 | 5.54E-09 | 3.44E-08 |
| SIGLEC10-AS1 | 0.011165 | 0.027225 | 1.285931 | 0.000245 | 0.000547 |
| ZNF204P      | 0.473362 | 1.158841 | 1.291667 | 1.30E-07 | 5.98E-07 |
| RPH3A        | 0.004888 | 0.014187 | 1.537212 | 0.011474 | 0.017744 |
| NCAPH        | 1.144062 | 2.946712 | 1.364941 | 6.00E-20 | 4.56E-18 |
| MPP4         | 0.012198 | 0.025748 | 1.077834 | 2.62E-07 | 1.13E-06 |
| FABP6        | 0.083352 | 0.811801 | 3.283835 | 1.52E-10 | 1.33E-09 |
| LINC00941    | 0.101735 | 0.308313 | 1.599577 | 4.48E-06 | 1.47E-05 |
| HERC2P3      | 0.132132 | 0.342596 | 1.374534 | 6.95E-07 | 2.73E-06 |
| KLRC2        | 0.020792 | 0.055963 | 1.428475 | 0.001774 | 0.003316 |
| SORCS1       | 0.015124 | 0.097728 | 2.691904 | 1.09E-08 | 6.33E-08 |
| MND1         | 1.189397 | 2.450182 | 1.042659 | 4.41E-16 | 1.37E-14 |
| ALOX15B      | 0.876882 | 2.791482 | 1.670577 | 0.000798 | 0.001599 |
| IMPDH1P8     | 0.025198 | 0.067238 | 1.41597  | 1.06E-10 | 9.68E-10 |
| KCP          | 0.133124 | 0.269274 | 1.016303 | 5.57E-05 | 0.000144 |
| TRHDE-AS1    | 0.077886 | 0.285146 | 1.872271 | 7.83E-05 | 0.000195 |
| ZNF439       | 0.128347 | 0.340039 | 1.405646 | 2.85E-10 | 2.34E-09 |
| AFP          | 41.88294 | 374.1831 | 3.15931  | 3.05E-09 | 2.00E-08 |
| FAXC         | 0.023528 | 0.051997 | 1.144064 | 9.39E-06 | 2.89E-05 |
| OPRD1        | 0.016471 | 0.062217 | 1.917349 | 6.72E-10 | 5.10E-09 |
| KCNK3        | 0.06606  | 0.166727 | 1.335639 | 0.022756 | 0.03289  |
| LINC02518    | 0.02744  | 0.078544 | 1.5172   | 0.000356 | 0.000771 |
| SERPINH1     | 14.30574 | 30.67424 | 1.100433 | 2.51E-16 | 8.24E-15 |
| LINC02829    | 0.02677  | 0.057427 | 1.101079 | 0.000349 | 0.000757 |

|            |          |          |          |          |          |
|------------|----------|----------|----------|----------|----------|
| LINC00158  | 0.010934 | 0.029916 | 1.452043 | 3.18E-05 | 8.62E-05 |
| INSL6      | 0.043504 | 0.349968 | 3.008006 | 2.33E-05 | 6.53E-05 |
| LINC00689  | 0.027053 | 0.097922 | 1.85584  | 1.46E-10 | 1.28E-09 |
| ZNF648     | 0.535588 | 0.265522 | -1.01229 | 7.55E-05 | 0.000189 |
| DTX3       | 1.211444 | 2.506759 | 1.049096 | 6.55E-08 | 3.22E-07 |
| ERVMER34-1 | 0.153676 | 0.58346  | 1.924742 | 2.92E-07 | 1.25E-06 |
| PCYT1B     | 0.022291 | 0.140769 | 2.658777 | 2.20E-05 | 6.20E-05 |
| SSX1       | 2.931398 | 13.07839 | 2.157524 | 8.57E-09 | 5.10E-08 |
| EXD1       | 0.005487 | 0.01454  | 1.405916 | 5.86E-06 | 1.89E-05 |
| FCHO1      | 0.360282 | 0.835479 | 1.213476 | 4.65E-08 | 2.37E-07 |
| NKAIN1     | 0.027465 | 0.074527 | 1.440195 | 8.29E-09 | 4.96E-08 |
| FER1L4     | 0.248908 | 0.540177 | 1.117818 | 5.10E-14 | 9.97E-13 |
| BNIP3P9    | 0.060386 | 0.193277 | 1.678373 | 5.16E-06 | 1.68E-05 |
| RTL8B      | 1.007254 | 2.389936 | 1.246545 | 0.000194 | 0.000445 |
| HOXB9      | 0.090171 | 0.471324 | 2.385988 | 0.005269 | 0.008808 |
| ZNF385C    | 0.199813 | 0.411762 | 1.043159 | 0.00294  | 0.005226 |
| IQCA1      | 0.063961 | 0.325994 | 2.349589 | 9.53E-08 | 4.52E-07 |
| FBLN1      | 3.638664 | 11.8009  | 1.697417 | 1.68E-06 | 6.08E-06 |
| SHOX2      | 0.043073 | 0.174868 | 2.021429 | 7.71E-12 | 9.15E-11 |
| CEP295NL   | 0.007413 | 0.020077 | 1.437428 | 6.56E-07 | 2.59E-06 |
| S100B      | 0.386963 | 0.82472  | 1.091709 | 9.04E-05 | 0.000222 |
| CFAP47     | 0.012609 | 0.032975 | 1.386966 | 0.000404 | 0.000864 |
| KRT8P14    | 0.017757 | 0.038694 | 1.123703 | 1.34E-07 | 6.15E-07 |
| SLC31A1P1  | 0.038426 | 0.149931 | 1.96413  | 6.97E-06 | 2.21E-05 |
| ERBB4      | 0.004997 | 0.0276   | 2.465605 | 0.008391 | 0.013407 |
| AURKB      | 2.0836   | 6.34321  | 1.606135 | 2.16E-21 | 2.22E-19 |
| C21orf58   | 0.540285 | 1.085527 | 1.006602 | 3.98E-17 | 1.60E-15 |
| FGF11      | 0.009223 | 0.019325 | 1.067131 | 0.000172 | 0.000397 |
| SLC17A8    | 0.017714 | 0.049144 | 1.4721   | 0.000426 | 0.000906 |
| SERPINI1   | 1.606487 | 4.966053 | 1.62819  | 3.17E-14 | 6.51E-13 |
| MIR155HG   | 0.239908 | 0.493562 | 1.040748 | 1.07E-06 | 4.05E-06 |
| GPX8       | 0.881345 | 1.862844 | 1.079729 | 0.000456 | 0.000963 |
| ARHGAP11A  | 0.807952 | 2.074629 | 1.360512 | 1.90E-21 | 1.98E-19 |
| TUBA4B     | 0.267281 | 0.62128  | 1.216885 | 0.014222 | 0.02154  |
| LINC01208  | 0.035604 | 0.098219 | 1.463967 | 0.003219 | 0.005662 |
| GIHCG      | 1.282862 | 2.585641 | 1.011155 | 1.41E-19 | 1.03E-17 |
| LEP        | 0.011197 | 0.181876 | 4.021751 | 0.001626 | 0.003061 |
| UHRF1      | 0.739271 | 2.063354 | 1.480816 | 1.16E-18 | 6.79E-17 |
| SYT1       | 0.355148 | 1.088637 | 1.61603  | 2.17E-13 | 3.70E-12 |
| FBXL7      | 0.877106 | 1.760707 | 1.005331 | 1.55E-07 | 7.04E-07 |
| SNORD88A   | 0.108826 | 0.248183 | 1.189384 | 2.03E-06 | 7.22E-06 |
| LGALS12    | 0.026094 | 0.429004 | 4.039202 | 7.59E-06 | 2.38E-05 |
| SLC2A5     | 0.961048 | 2.118224 | 1.140175 | 5.04E-07 | 2.05E-06 |
| ELAVL4     | 0.009353 | 0.027325 | 1.546643 | 6.28E-08 | 3.11E-07 |

|           |          |          |          |          |          |
|-----------|----------|----------|----------|----------|----------|
| SMARCE1P6 | 0.029117 | 0.073317 | 1.332289 | 4.54E-06 | 1.49E-05 |
| MCM7      | 12.87483 | 28.63966 | 1.153461 | 2.81E-26 | 1.68E-23 |
| CENPO     | 0.798655 | 1.776766 | 1.15361  | 6.53E-24 | 1.37E-21 |
| ZFP57     | 0.047218 | 0.226489 | 2.262028 | 0.003097 | 0.005472 |
| CD300LG   | 0.367881 | 0.13593  | -1.43638 | 1.40E-14 | 3.17E-13 |
| DDX11-AS1 | 0.118447 | 0.271937 | 1.199034 | 1.51E-18 | 8.58E-17 |
| MEG8      | 0.020599 | 0.10273  | 2.318189 | 0.018417 | 0.027197 |
| CD19      | 0.188402 | 0.513047 | 1.445279 | 7.20E-05 | 0.000181 |
| H2AC12    | 0.044742 | 0.101253 | 1.178271 | 1.80E-06 | 6.47E-06 |
| LINC01139 | 0.231279 | 1.540633 | 2.735816 | 5.80E-13 | 8.96E-12 |
| IGF2BP2   | 2.360398 | 5.678172 | 1.266396 | 7.33E-13 | 1.10E-11 |
| HECW1     | 0.028538 | 0.073008 | 1.355169 | 0.00456  | 0.007742 |
| MEX3A     | 0.676218 | 1.7851   | 1.400444 | 1.99E-16 | 6.73E-15 |
| ITLN1     | 0.199413 | 0.671648 | 1.751946 | 0.000471 | 0.000992 |
| PIP5KL1   | 0.074544 | 0.152252 | 1.030293 | 1.59E-09 | 1.12E-08 |
| PLA2G4D   | 0.005668 | 0.012875 | 1.183727 | 5.18E-07 | 2.10E-06 |
| TRAV39    | 0.06633  | 0.150761 | 1.184538 | 0.026093 | 0.037233 |
| PLEKHB1   | 0.489806 | 2.889082 | 2.560329 | 9.26E-10 | 6.84E-09 |
| NPSR1-AS1 | 0.101726 | 0.256136 | 1.332219 | 6.13E-07 | 2.44E-06 |
| FCGR1B    | 0.065534 | 0.157161 | 1.261938 | 2.94E-07 | 1.26E-06 |
| DUXAP9    | 0.050426 | 0.112032 | 1.151677 | 2.16E-12 | 2.88E-11 |
| PAGE2B    | 2.312392 | 9.943939 | 2.104431 | 3.94E-09 | 2.52E-08 |
| CLMP      | 0.14866  | 0.413019 | 1.474194 | 0.01432  | 0.021669 |
| GLB1L3    | 0.013022 | 0.093449 | 2.84328  | 8.77E-09 | 5.21E-08 |
| SDS       | 239.1467 | 86.74463 | -1.46305 | 4.36E-07 | 1.79E-06 |
| C5orf58   | 0.156381 | 0.548585 | 1.810648 | 4.02E-10 | 3.18E-09 |
| CYCSP6    | 0.222215 | 0.535408 | 1.268685 | 3.67E-05 | 9.81E-05 |
| PRDM9     | 0.01632  | 0.060411 | 1.888137 | 3.76E-06 | 1.26E-05 |
| LINC00632 | 0.006452 | 0.136524 | 4.403229 | 1.82E-11 | 1.99E-10 |
| TEDC2     | 1.044115 | 2.715176 | 1.378765 | 3.35E-24 | 7.56E-22 |
| MARCKS    | 14.11669 | 29.86542 | 1.081074 | 1.35E-15 | 3.81E-14 |
| DNAH8     | 0.010137 | 0.030621 | 1.594875 | 4.97E-07 | 2.02E-06 |
| HBE1      | 0.105866 | 0.644908 | 2.606859 | 5.38E-05 | 0.000139 |
| CALB2     | 0.065903 | 0.29822  | 2.177967 | 3.31E-05 | 8.95E-05 |
| G3BP1P1   | 0.009509 | 0.034755 | 1.869888 | 2.31E-12 | 3.06E-11 |
| KRT18P5   | 0.049732 | 0.115416 | 1.214598 | 1.10E-13 | 2.00E-12 |
| LINC00491 | 0.046946 | 0.214673 | 2.193078 | 6.70E-12 | 8.02E-11 |
| LINC01287 | 0.854171 | 5.032252 | 2.558607 | 7.12E-07 | 2.79E-06 |
| OLFML2B   | 2.076978 | 5.020101 | 1.27323  | 1.81E-07 | 8.07E-07 |
| UCHL1     | 0.608582 | 14.36752 | 4.561216 | 2.04E-06 | 7.24E-06 |
| KIF4B     | 0.002332 | 0.006489 | 1.476391 | 5.23E-07 | 2.11E-06 |
| LINC01684 | 0.011167 | 0.025929 | 1.215353 | 0.002284 | 0.00416  |
| B3GNT7    | 0.783994 | 1.73723  | 1.147874 | 0.000973 | 0.001914 |
| SULT1B1   | 3.684179 | 1.534801 | -1.26329 | 7.33E-08 | 3.57E-07 |

|             |          |          |          |          |          |
|-------------|----------|----------|----------|----------|----------|
| SLCO5A1-AS1 | 0.021425 | 0.043932 | 1.035989 | 0.001263 | 0.002433 |
| LINC00501   | 0.016394 | 0.092425 | 2.495147 | 5.92E-09 | 3.65E-08 |
| TUBA3C      | 0.230702 | 5.229442 | 4.502553 | 1.69E-10 | 1.46E-09 |
| CRYBA4      | 0.028569 | 1.310931 | 5.519973 | 0.008934 | 0.014193 |
| LINC01694   | 0.031978 | 0.178329 | 2.479387 | 6.45E-10 | 4.91E-09 |
| C2CD6       | 0.021073 | 0.046939 | 1.15536  | 0.012115 | 0.018634 |
| GIPR        | 0.187342 | 0.487308 | 1.379163 | 1.22E-08 | 6.99E-08 |
| LINC01730   | 0.103669 | 0.278527 | 1.425838 | 2.70E-08 | 1.45E-07 |
| SLC8A2      | 0.014415 | 0.052088 | 1.8534   | 0.00029  | 0.000639 |
| C8orf48     | 0.102941 | 0.210562 | 1.032427 | 8.27E-05 | 0.000205 |
| BMF         | 2.179072 | 4.434975 | 1.025213 | 2.28E-12 | 3.02E-11 |
| TTC36       | 17.0493  | 7.543827 | -1.17634 | 1.73E-09 | 1.20E-08 |
| MSX1        | 0.79057  | 1.659741 | 1.069993 | 0.017848 | 0.026454 |
| RPL39P18    | 0.071205 | 0.165977 | 1.220928 | 5.03E-06 | 1.64E-05 |
| TEX11       | 0.25574  | 0.626367 | 1.292328 | 0.001853 | 0.003443 |
| RPS8P4      | 0.028487 | 0.088885 | 1.641653 | 0.000125 | 0.000299 |
| TRIP13      | 0.791887 | 2.842151 | 1.843616 | 1.16E-25 | 5.03E-23 |
| MIR1295A    | 2.528746 | 1.16909  | -1.11304 | 1.41E-06 | 5.19E-06 |
| CLSTN1      | 7.011635 | 15.32108 | 1.127696 | 7.35E-15 | 1.76E-13 |
| LINC00173   | 0.051645 | 0.137993 | 1.41789  | 8.59E-06 | 2.66E-05 |
| ITPKA       | 2.677901 | 6.08106  | 1.18322  | 1.61E-11 | 1.77E-10 |
| TREH        | 1.741756 | 0.835568 | -1.05971 | 8.08E-08 | 3.89E-07 |
| PABPN1P2    | 0.010638 | 0.023897 | 1.167634 | 1.57E-05 | 4.59E-05 |
| ANKLE1      | 0.065874 | 0.233436 | 1.825234 | 8.27E-13 | 1.23E-11 |
| GAPDHP32    | 0.030463 | 0.062214 | 1.030154 | 0.000693 | 0.00141  |
| ZNF556      | 0.017655 | 0.074134 | 2.07007  | 4.14E-11 | 4.16E-10 |
| ZNF99       | 0.031855 | 0.151016 | 2.245109 | 4.17E-08 | 2.14E-07 |
| STRA6       | 0.090123 | 0.203162 | 1.172671 | 1.18E-05 | 3.55E-05 |
| CREG2       | 0.024009 | 0.060516 | 1.333721 | 6.44E-11 | 6.15E-10 |
| DMC1        | 0.077989 | 0.211373 | 1.43845  | 9.80E-11 | 9.03E-10 |
| CTH         | 40.24681 | 19.09093 | -1.07599 | 1.60E-07 | 7.22E-07 |
| LINC01191   | 0.055289 | 0.133861 | 1.275683 | 6.60E-06 | 2.10E-05 |
| ACSM4       | 0.021528 | 0.043213 | 1.005264 | 0.002209 | 0.004036 |
| VAT1L       | 0.626837 | 1.296107 | 1.048022 | 0.002212 | 0.004041 |
| HEPACAM2    | 0.059316 | 0.121242 | 1.031412 | 0.002796 | 0.004999 |
| GTSF1       | 0.805983 | 4.577797 | 2.505832 | 1.70E-10 | 1.47E-09 |
| LHFPL3-AS2  | 0.202674 | 0.900101 | 2.150924 | 5.18E-12 | 6.38E-11 |
| FABP5       | 1.976012 | 5.121372 | 1.373939 | 1.20E-10 | 1.08E-09 |
| CDCP2       | 0.004514 | 0.010716 | 1.247356 | 3.67E-07 | 1.53E-06 |
| NXPE3       | 0.254745 | 0.605006 | 1.247893 | 4.33E-06 | 1.43E-05 |
| DYNLL1P4    | 0.045495 | 0.106583 | 1.22821  | 3.44E-06 | 1.16E-05 |
| RNFT2       | 0.17398  | 0.496221 | 1.512062 | 4.58E-21 | 4.39E-19 |
| GJB7        | 0.00906  | 0.042201 | 2.219777 | 0.000801 | 0.001604 |
| ARHGEF39    | 0.527819 | 1.217648 | 1.205981 | 2.27E-23 | 3.97E-21 |

|            |          |          |          |          |          |
|------------|----------|----------|----------|----------|----------|
| FAM27E3    | 0.032751 | 0.082866 | 1.339235 | 6.79E-06 | 2.16E-05 |
| ZIM2       | 0.01464  | 0.046127 | 1.655745 | 8.87E-07 | 3.41E-06 |
| LINC02607  | 0.012144 | 0.067637 | 2.477557 | 1.07E-05 | 3.25E-05 |
| PIGAP1     | 0.00414  | 0.014335 | 1.791931 | 4.47E-10 | 3.51E-09 |
| SATB1-AS1  | 0.010674 | 0.048164 | 2.173866 | 7.12E-07 | 2.79E-06 |
| TROAP-AS1  | 0.003646 | 0.008174 | 1.164607 | 6.62E-07 | 2.61E-06 |
| SIX1       | 0.159061 | 0.320638 | 1.011367 | 0.000294 | 0.000645 |
| ZNF714     | 0.113476 | 0.311527 | 1.456974 | 3.59E-14 | 7.27E-13 |
| PKM        | 15.10973 | 35.73843 | 1.241998 | 2.99E-19 | 2.05E-17 |
| LINC01960  | 0.010067 | 0.03456  | 1.779475 | 1.75E-05 | 5.05E-05 |
| HNRNPA1P54 | 0.003101 | 0.006949 | 1.164334 | 8.60E-07 | 3.32E-06 |
| ZBTB8B     | 0.002039 | 0.004569 | 1.164052 | 0.000414 | 0.000882 |
| NOVA1-DT   | 0.091237 | 0.311579 | 1.771906 | 3.01E-10 | 2.46E-09 |
| PODXL2     | 3.230358 | 6.860735 | 1.086669 | 1.07E-06 | 4.06E-06 |
| CDC37P1    | 0.03276  | 0.065699 | 1.003917 | 0.006601 | 0.010781 |
| SYN3       | 0.085201 | 0.204713 | 1.264662 | 0.000213 | 0.000483 |
| PSMA8      | 0.004747 | 0.1403   | 4.885301 | 1.20E-09 | 8.63E-09 |
| TM4SF19    | 0.111696 | 0.340478 | 1.607981 | 0.012509 | 0.019175 |
| CADPS      | 0.035334 | 0.200417 | 2.503873 | 0.009749 | 0.015343 |
| DGKI       | 0.024166 | 0.052492 | 1.119118 | 2.36E-05 | 6.61E-05 |
| PAX9       | 0.012448 | 0.046149 | 1.890424 | 0.000831 | 0.00166  |
| KCTD19     | 0.003838 | 0.009273 | 1.272875 | 0.000129 | 0.000307 |
| LTO1       | 1.384979 | 4.330513 | 1.644673 | 4.17E-10 | 3.29E-09 |
| RNA5SP283  | 0.170074 | 0.385922 | 1.18215  | 0.023266 | 0.033534 |
| CRYGS      | 0.676779 | 2.494218 | 1.881831 | 3.62E-09 | 2.33E-08 |
| RPS2P32    | 0.264061 | 0.642492 | 1.282808 | 8.23E-11 | 7.71E-10 |
| OMG        | 0.080148 | 0.422802 | 2.399239 | 0.012949 | 0.019791 |
| LINC02043  | 0.021056 | 0.070197 | 1.737206 | 4.54E-12 | 5.64E-11 |
| GPNMB      | 7.425539 | 15.45078 | 1.057112 | 0.000272 | 0.000601 |
| LINC00470  | 0.166874 | 0.448115 | 1.425115 | 2.98E-07 | 1.27E-06 |
| SLC22A1    | 111.0856 | 52.1254  | -1.09161 | 5.88E-08 | 2.92E-07 |
| CABP7      | 0.074435 | 0.170867 | 1.198814 | 3.11E-08 | 1.64E-07 |
| TET1       | 0.09516  | 0.279669 | 1.555302 | 1.55E-18 | 8.75E-17 |
| LSP1P4     | 0.238858 | 0.508868 | 1.091134 | 3.68E-09 | 2.37E-08 |
| KCNH8      | 0.040572 | 0.116102 | 1.516823 | 3.81E-08 | 1.98E-07 |
| BRDT       | 0.002035 | 0.264575 | 7.02233  | 5.46E-10 | 4.22E-09 |
| GPR84      | 0.09905  | 0.305312 | 1.624047 | 1.23E-08 | 7.09E-08 |
| TMEM156    | 1.464191 | 2.970714 | 1.020706 | 0.000619 | 0.001272 |
| GRM3       | 0.011123 | 0.097769 | 3.135819 | 1.64E-06 | 5.92E-06 |
| LINC00652  | 0.013835 | 0.034067 | 1.300019 | 3.31E-05 | 8.95E-05 |
| S100A3     | 0.349573 | 0.964718 | 1.464511 | 2.79E-05 | 7.67E-05 |
| SLC1A5     | 4.021724 | 13.72177 | 1.770581 | 1.08E-14 | 2.48E-13 |
| HCAR2      | 0.139893 | 0.433934 | 1.633149 | 4.48E-07 | 1.84E-06 |
| CDKN2C     | 3.636094 | 7.997918 | 1.137235 | 3.90E-18 | 2.00E-16 |



|           |          |          |          |          |          |
|-----------|----------|----------|----------|----------|----------|
| HELLS     | 0.49033  | 1.195473 | 1.285756 | 3.69E-20 | 2.89E-18 |
| DUSP5P1   | 0.07376  | 0.185448 | 1.330105 | 0.000117 | 0.000281 |
| CTRC      | 0.011808 | 0.033252 | 1.493648 | 0.000924 | 0.001827 |
| CDKN3     | 3.0768   | 7.439114 | 1.2737   | 3.56E-19 | 2.40E-17 |
| TIGIT     | 0.308846 | 0.674763 | 1.127492 | 3.14E-05 | 8.53E-05 |
| TACC3     | 2.573592 | 6.967597 | 1.436878 | 1.38E-27 | 2.16E-24 |
| FCRL5     | 0.043646 | 0.115969 | 1.409809 | 0.01613  | 0.024146 |
| DDX53     | 0.07548  | 0.277115 | 1.876312 | 4.84E-07 | 1.97E-06 |
| LINC00494 | 0.157782 | 0.37339  | 1.242751 | 1.53E-06 | 5.57E-06 |
| CDKN2A-DT | 0.04831  | 0.111041 | 1.200689 | 1.73E-08 | 9.64E-08 |
| HMGA2     | 0.039726 | 0.478    | 3.588858 | 3.30E-12 | 4.20E-11 |
| WDR62     | 0.414263 | 1.18115  | 1.511573 | 3.39E-25 | 1.11E-22 |
| CHRNA2    | 0.009397 | 0.03183  | 1.76009  | 0.005426 | 0.009046 |
| LINC01572 | 0.024048 | 0.064592 | 1.425427 | 1.77E-13 | 3.09E-12 |
| B3GNT5    | 0.850536 | 2.045279 | 1.265853 | 1.14E-06 | 4.27E-06 |
| SBK1      | 0.244397 | 0.514018 | 1.07259  | 6.21E-06 | 1.99E-05 |
| CHML      | 1.386859 | 2.940532 | 1.084256 | 8.30E-14 | 1.56E-12 |
| TSPAN10   | 0.483984 | 1.432718 | 1.565723 | 0.000734 | 0.001483 |
| IGHV7-81  | 0.110503 | 0.33382  | 1.59499  | 0.000128 | 0.000305 |
| ETV5      | 1.788685 | 3.85882  | 1.109261 | 4.86E-15 | 1.21E-13 |
| MYPN      | 0.004376 | 0.010782 | 1.300979 | 0.000598 | 0.001233 |
| WTAPP1    | 0.024255 | 0.076863 | 1.664006 | 5.82E-08 | 2.90E-07 |
| SMKR1     | 0.243757 | 0.525376 | 1.107909 | 0.001009 | 0.001979 |
| ZNF229    | 0.243175 | 0.651117 | 1.42092  | 1.19E-09 | 8.60E-09 |
| CCDC185   | 0.030649 | 0.102787 | 1.745752 | 2.59E-05 | 7.18E-05 |
| SPTSSB    | 0.223101 | 0.73515  | 1.720343 | 5.05E-08 | 2.55E-07 |
| MATN3     | 0.435973 | 2.358143 | 2.435341 | 4.72E-06 | 1.55E-05 |
| TGFB2     | 0.605281 | 1.355955 | 1.163632 | 0.006298 | 0.010338 |
| NIBAN1    | 0.865764 | 1.785817 | 1.044539 | 0.024347 | 0.034933 |
| BNIP3P17  | 0.041337 | 0.3548   | 3.101498 | 2.33E-17 | 9.98E-16 |
| GAPDHP21  | 0.024047 | 0.058038 | 1.271151 | 1.34E-06 | 4.96E-06 |
| ZFPM2-AS1 | 0.810161 | 2.195496 | 1.438267 | 3.68E-06 | 1.23E-05 |
| ZNF391    | 0.131172 | 0.372181 | 1.504548 | 8.40E-12 | 9.88E-11 |
| VCX3A     | 0.034638 | 1.018175 | 4.877498 | 3.15E-11 | 3.28E-10 |
| APCDD1L   | 0.016058 | 0.148938 | 3.213346 | 9.80E-06 | 3.00E-05 |
| LINC00958 | 0.033805 | 0.420056 | 3.635259 | 1.81E-08 | 1.00E-07 |
| STX1A     | 0.453214 | 0.937957 | 1.049331 | 1.34E-20 | 1.13E-18 |
| RFC4      | 3.455119 | 7.780664 | 1.171158 | 2.21E-27 | 2.80E-24 |
| IGKV2-29  | 0.640037 | 3.034899 | 2.245421 | 0.006448 | 0.010559 |
| ABCC8     | 0.046408 | 0.161584 | 1.799834 | 0.000279 | 0.000616 |
| ZNF788P   | 0.144312 | 0.322767 | 1.161304 | 5.62E-11 | 5.46E-10 |
| RANBP3L   | 0.609819 | 0.298945 | -1.0285  | 4.55E-05 | 0.00012  |
| ZNF812P   | 0.158408 | 0.705385 | 2.154768 | 0.00029  | 0.000639 |
| MAGEA8    | 0.062574 | 0.97841  | 3.966802 | 9.67E-10 | 7.11E-09 |

|            |          |          |          |          |          |
|------------|----------|----------|----------|----------|----------|
| DGKB       | 0.019524 | 0.043533 | 1.156896 | 0.012876 | 0.019688 |
| POLR2MP1   | 0.023096 | 0.058857 | 1.349602 | 0.000124 | 0.000297 |
| LINC00520  | 0.009617 | 0.027006 | 1.489661 | 8.45E-05 | 0.000209 |
| CRB2       | 0.017121 | 0.048229 | 1.49413  | 0.00037  | 0.000799 |
| HERC2P8    | 0.001365 | 0.005794 | 2.085833 | 1.01E-09 | 7.36E-09 |
| CECR7      | 0.053056 | 0.370732 | 2.8048   | 8.93E-13 | 1.32E-11 |
| UTS2R      | 0.032307 | 0.083112 | 1.363217 | 0.005329 | 0.008899 |
| RHEX       | 0.614391 | 2.031478 | 1.7253   | 5.49E-11 | 5.34E-10 |
| CT75       | 0.014719 | 0.080458 | 2.450587 | 3.28E-05 | 8.87E-05 |
| HOXA6      | 0.041908 | 0.094836 | 1.178208 | 9.31E-07 | 3.56E-06 |
| RPL7AP28   | 0.026689 | 0.225562 | 3.079201 | 2.55E-05 | 7.08E-05 |
| CBX2       | 0.526868 | 1.604719 | 1.606806 | 6.20E-12 | 7.49E-11 |
| SLC66A1L   | 0.025219 | 0.203768 | 3.014333 | 9.80E-09 | 5.75E-08 |
| PTGDR2     | 0.578296 | 1.732813 | 1.583236 | 0.002477 | 0.004477 |
| CNTNAP1    | 0.437114 | 1.140398 | 1.383455 | 5.76E-12 | 7.01E-11 |
| IGF2BP1    | 0.793371 | 2.952752 | 1.895992 | 9.71E-11 | 8.95E-10 |
| TMEM130    | 0.074041 | 0.969817 | 3.711313 | 0.000256 | 0.00057  |
| RNVU1-3    | 0.21644  | 0.501075 | 1.211055 | 6.85E-08 | 3.36E-07 |
| RAMP2-AS1  | 0.166326 | 0.368807 | 1.148851 | 1.66E-05 | 4.83E-05 |
| PLBD1-AS1  | 0.213345 | 0.463969 | 1.120838 | 2.20E-06 | 7.78E-06 |
| LINC00355  | 0.147325 | 0.426422 | 1.533278 | 2.71E-07 | 1.17E-06 |
| LINC00664  | 0.015504 | 0.071498 | 2.205275 | 1.98E-09 | 1.36E-08 |
| FZD7       | 0.681315 | 1.609972 | 1.240641 | 1.61E-06 | 5.84E-06 |
| IGHV1-69   | 1.07674  | 6.520772 | 2.598372 | 0.012645 | 0.019367 |
| GABRA2     | 0.0394   | 0.31739  | 3.009986 | 2.03E-06 | 7.20E-06 |
| LINC02208  | 0.004524 | 0.010823 | 1.258333 | 0.002072 | 0.003805 |
| HERC2P5    | 0.003153 | 0.013205 | 2.066147 | 4.18E-10 | 3.30E-09 |
| APCDD1L-DT | 0.00404  | 0.02628  | 2.701397 | 5.28E-08 | 2.66E-07 |
| PRSS45P    | 0.087062 | 0.176846 | 1.02238  | 1.90E-05 | 5.45E-05 |
| ADGRD1     | 0.701296 | 1.495351 | 1.09239  | 0.000786 | 0.001576 |
| LINC01914  | 0.128904 | 0.293963 | 1.189341 | 0.001119 | 0.002176 |
| AFF2       | 0.032141 | 0.21022  | 2.709422 | 9.17E-07 | 3.51E-06 |
| KC6        | 0.031782 | 0.127187 | 2.00066  | 6.64E-06 | 2.11E-05 |
| LINC02765  | 0.021804 | 0.044824 | 1.039712 | 7.62E-05 | 0.00019  |
| SAA2       | 250.6695 | 45.20698 | -2.47117 | 1.95E-05 | 5.57E-05 |
| PNPLA1     | 0.007426 | 0.022766 | 1.616158 | 1.91E-05 | 5.47E-05 |
| POU2AF1    | 0.205733 | 0.600339 | 1.545001 | 5.52E-07 | 2.22E-06 |
| LINC02280  | 0.00796  | 0.016917 | 1.087714 | 0.004049 | 0.006963 |
| LINC01012  | 0.017381 | 0.038125 | 1.133237 | 4.19E-06 | 1.39E-05 |
| XIRP1      | 0.015566 | 0.048604 | 1.642703 | 1.44E-05 | 4.25E-05 |
| MAP3K4-AS1 | 0.136091 | 0.280861 | 1.045279 | 8.46E-10 | 6.31E-09 |
| FAR2P1     | 0.084644 | 0.350728 | 2.050872 | 1.99E-11 | 2.15E-10 |
| KNTC1      | 0.713737 | 1.782075 | 1.320094 | 1.13E-20 | 9.64E-19 |
| CTAG2      | 0.992753 | 11.06046 | 3.477833 | 3.08E-12 | 3.95E-11 |

|            |          |          |          |          |          |
|------------|----------|----------|----------|----------|----------|
| SASS6      | 0.625714 | 1.317747 | 1.074498 | 3.09E-19 | 2.12E-17 |
| LHFPL4     | 0.14986  | 0.333457 | 1.153887 | 2.32E-05 | 6.52E-05 |
| COL8A2     | 0.416575 | 0.929148 | 1.157331 | 0.000782 | 0.001569 |
| LINC00189  | 0.340138 | 0.899961 | 1.403742 | 2.33E-05 | 6.54E-05 |
| FOXL1      | 0.148262 | 0.346797 | 1.225945 | 2.73E-06 | 9.42E-06 |
| NRM        | 4.537558 | 10.0112  | 1.141627 | 4.00E-20 | 3.13E-18 |
| CEP55      | 0.665769 | 2.296811 | 1.786539 | 2.83E-23 | 4.80E-21 |
| MLXP1      | 0.028192 | 0.134398 | 2.253137 | 5.32E-05 | 0.000137 |
| AQP10      | 0.124864 | 0.669801 | 2.42337  | 7.61E-06 | 2.39E-05 |
| ATP1A4     | 0.012204 | 0.037856 | 1.633216 | 0.0023   | 0.004185 |
| LINC01192  | 0.007288 | 0.036358 | 2.31862  | 3.80E-10 | 3.03E-09 |
| GJB6       | 0.072373 | 0.686029 | 3.244738 | 0.001488 | 0.002826 |
| GLIS2      | 1.9581   | 4.053652 | 1.049768 | 3.40E-10 | 2.74E-09 |
| MYCBPAP    | 0.023285 | 0.054594 | 1.229365 | 4.47E-08 | 2.29E-07 |
| PITX2      | 0.025663 | 0.215512 | 3.069987 | 5.55E-09 | 3.44E-08 |
| SPIB       | 0.401751 | 1.447116 | 1.848806 | 5.98E-06 | 1.92E-05 |
| FOXN4      | 0.66367  | 1.605066 | 1.274095 | 0.006325 | 0.010377 |
| ANGPTL1    | 3.150659 | 1.355861 | -1.21644 | 2.37E-07 | 1.03E-06 |
| CDCA5      | 1.936187 | 5.133416 | 1.406701 | 5.18E-25 | 1.59E-22 |
| ZNF835     | 0.136848 | 0.291473 | 1.090781 | 2.04E-06 | 7.24E-06 |
| SLC2A1     | 1.298422 | 3.803465 | 1.550556 | 1.11E-08 | 6.44E-08 |
| CNDP1      | 1.427215 | 0.582709 | -1.29236 | 0.003102 | 0.00548  |
| RPL35P5    | 1.14405  | 2.843731 | 1.313635 | 3.69E-05 | 9.86E-05 |
| LINC02228  | 0.04369  | 0.545938 | 3.643357 | 1.14E-09 | 8.24E-09 |
| VAX2       | 0.288827 | 0.640204 | 1.148326 | 0.018986 | 0.02794  |
| TYRO3      | 0.557356 | 1.588369 | 1.510875 | 2.28E-14 | 4.89E-13 |
| MCF2L2     | 0.026601 | 0.099393 | 1.901656 | 9.04E-09 | 5.34E-08 |
| C7orf61    | 0.082224 | 0.234138 | 1.50972  | 8.06E-07 | 3.13E-06 |
| TRIM71     | 0.367203 | 1.726536 | 2.23323  | 2.31E-07 | 1.01E-06 |
| DEPDC1-AS1 | 0.011786 | 0.050631 | 2.102998 | 7.00E-13 | 1.06E-11 |
| MAMSTR     | 0.358884 | 1.007344 | 1.488968 | 1.57E-16 | 5.42E-15 |
| CHST10     | 0.490417 | 1.071407 | 1.127425 | 1.58E-07 | 7.17E-07 |
| POLD1      | 3.112209 | 6.362936 | 1.031754 | 1.34E-26 | 1.09E-23 |
| CCDC13-AS1 | 0.076484 | 0.407615 | 2.41397  | 9.57E-08 | 4.54E-07 |
| CDHR1      | 0.043744 | 0.239714 | 2.454154 | 0.035163 | 0.048693 |
| LINC00506  | 0.008877 | 0.03442  | 1.955158 | 3.93E-12 | 4.95E-11 |
| PYCR1      | 4.537002 | 11.85411 | 1.385576 | 2.15E-07 | 9.44E-07 |
| LINC02315  | 0.288636 | 1.115836 | 1.9508   | 5.87E-09 | 3.62E-08 |
| ACTBP8     | 0.056151 | 0.826403 | 3.879456 | 1.49E-10 | 1.31E-09 |
| CASC8      | 0.034521 | 0.163388 | 2.242773 | 2.54E-08 | 1.37E-07 |
| DDIAS      | 0.278974 | 0.643238 | 1.20522  | 1.28E-18 | 7.36E-17 |
| HGFAC      | 37.09467 | 15.85754 | -1.22604 | 3.56E-08 | 1.85E-07 |
| LINC01905  | 0.044935 | 0.161231 | 1.843201 | 3.20E-08 | 1.69E-07 |
| UBE2S      | 3.479725 | 8.748256 | 1.330022 | 2.06E-26 | 1.39E-23 |

|           |          |          |          |          |          |
|-----------|----------|----------|----------|----------|----------|
| B3GNT9    | 0.789166 | 1.586529 | 1.007473 | 2.53E-07 | 1.10E-06 |
| HLA-DQB2  | 2.273767 | 4.8744   | 1.10014  | 0.000189 | 0.000434 |
| ZNF93     | 0.181636 | 0.564879 | 1.636891 | 3.00E-18 | 1.56E-16 |
| GPX7      | 2.717237 | 6.044615 | 1.15351  | 4.33E-10 | 3.41E-09 |
| ASF1B     | 2.3632   | 6.73192  | 1.510276 | 7.00E-24 | 1.45E-21 |
| SAMD13    | 0.097117 | 0.21942  | 1.175895 | 3.02E-07 | 1.29E-06 |
| B3GAT2    | 0.039465 | 0.084797 | 1.103451 | 2.03E-06 | 7.20E-06 |
| GJD4      | 0.008701 | 0.017639 | 1.019547 | 0.002021 | 0.003722 |
| OVOL3     | 0.028639 | 0.0816   | 1.51057  | 9.58E-08 | 4.54E-07 |
| VN1R20P   | 0.024533 | 0.054843 | 1.160567 | 5.04E-06 | 1.65E-05 |
| KHDRBS2   | 0.016767 | 0.043382 | 1.371521 | 0.001994 | 0.00368  |
| RPS3AP13  | 0.019906 | 0.039933 | 1.004413 | 8.59E-06 | 2.66E-05 |
| TERB2     | 0.349624 | 0.118029 | -1.56666 | 4.60E-07 | 1.88E-06 |
| POLD2P1   | 0.025127 | 0.141169 | 2.490145 | 3.40E-11 | 3.50E-10 |
| STAC      | 0.149255 | 0.384146 | 1.363876 | 0.013193 | 0.02013  |
| FCGR3A    | 7.300407 | 14.82407 | 1.021893 | 6.15E-05 | 0.000157 |
| PCSK1N    | 2.461356 | 6.220069 | 1.337477 | 1.94E-05 | 5.55E-05 |
| ZC3HAV1L  | 0.273898 | 0.598256 | 1.127127 | 1.50E-08 | 8.47E-08 |
| CD80      | 0.090216 | 0.193148 | 1.09825  | 3.66E-06 | 1.23E-05 |
| MCOLN3    | 0.159535 | 0.650383 | 2.027413 | 9.27E-08 | 4.41E-07 |
| CTSK      | 5.275538 | 24.09948 | 2.191612 | 0.000165 | 0.000384 |
| ITGA3     | 1.746152 | 3.78973  | 1.117916 | 0.002191 | 0.004005 |
| CSTL1     | 0.037994 | 0.119423 | 1.652238 | 0.000106 | 0.000258 |
| SHISAL2B  | 0.01723  | 0.03552  | 1.043752 | 0.000457 | 0.000966 |
| ACTG1P20  | 0.152865 | 0.330666 | 1.113118 | 6.93E-07 | 2.72E-06 |
| STARD6    | 0.004451 | 0.050913 | 3.515792 | 2.94E-13 | 4.81E-12 |
| MLF1      | 0.218768 | 0.632546 | 1.531769 | 3.43E-06 | 1.16E-05 |
| SF3A3P2   | 0.005238 | 0.011656 | 1.15408  | 9.84E-06 | 3.01E-05 |
| DGKK      | 0.016612 | 0.130855 | 2.977666 | 0.021788 | 0.031639 |
| PRKCG     | 0.007118 | 0.025849 | 1.860555 | 2.47E-06 | 8.61E-06 |
| LINC00628 | 0.06908  | 0.141436 | 1.0338   | 3.44E-11 | 3.53E-10 |
| LINC01748 | 0.042324 | 0.420402 | 3.312212 | 8.27E-21 | 7.50E-19 |
| MRPS17P1  | 0.007745 | 0.021675 | 1.484687 | 1.91E-07 | 8.49E-07 |
| NFIA-AS2  | 0.023987 | 0.049807 | 1.054128 | 0.000396 | 0.000849 |
| CENPE     | 0.344662 | 0.942878 | 1.451889 | 2.42E-21 | 2.46E-19 |
| IGHV4-39  | 10.48276 | 35.35952 | 1.75408  | 0.029429 | 0.041446 |
| CDCA7     | 0.458096 | 2.170216 | 2.244118 | 4.82E-13 | 7.55E-12 |
| MATN4     | 0.030784 | 0.70247  | 4.51218  | 0.000478 | 0.001005 |
| CASC18    | 0.015046 | 0.039459 | 1.390984 | 0.002239 | 0.004084 |
| TFPI2-DT  | 0.022354 | 0.125407 | 2.488026 | 2.87E-11 | 3.00E-10 |
| LINC01224 | 0.092664 | 0.390592 | 2.075589 | 3.36E-13 | 5.44E-12 |
| NPPB      | 0.147791 | 0.320923 | 1.118673 | 1.35E-08 | 7.68E-08 |
| SMPD4P1   | 0.008266 | 0.043972 | 2.41136  | 0.000647 | 0.001325 |
| LINC02576 | 0.027686 | 0.080948 | 1.547865 | 1.23E-07 | 5.69E-07 |

|           |          |          |          |          |          |
|-----------|----------|----------|----------|----------|----------|
| CRIL      | 0.026017 | 0.080462 | 1.628848 | 9.28E-08 | 4.41E-07 |
| ARPC3P5   | 0.028731 | 0.070767 | 1.300497 | 2.09E-05 | 5.92E-05 |
| SPON1-AS1 | 0.048339 | 0.127585 | 1.400204 | 0.000505 | 0.001057 |
| CDC25C    | 0.905469 | 2.416606 | 1.416246 | 1.75E-21 | 1.86E-19 |
| VN1R48P   | 0.090657 | 0.189244 | 1.061764 | 0.024996 | 0.035791 |
| SOHLH1    | 0.029802 | 0.570692 | 4.259249 | 2.11E-06 | 7.48E-06 |
| GAS2L3    | 0.518393 | 1.370508 | 1.402591 | 9.69E-22 | 1.11E-19 |
| FAT2      | 0.010386 | 0.030184 | 1.539171 | 2.05E-05 | 5.83E-05 |
| CXCL5     | 0.734835 | 6.165996 | 3.068841 | 3.79E-07 | 1.58E-06 |
| TMIE      | 0.745146 | 1.68153  | 1.17418  | 0.000373 | 0.000804 |
| NOC2LP2   | 0.019901 | 0.062855 | 1.659196 | 6.35E-07 | 2.52E-06 |
| RCC2P6    | 0.009531 | 0.024994 | 1.390887 | 9.29E-07 | 3.55E-06 |
| FOXN1     | 0.01265  | 0.032733 | 1.37162  | 0.000379 | 0.000816 |
| LGI4      | 0.737108 | 1.724504 | 1.226234 | 1.01E-05 | 3.09E-05 |
| BTN1A1    | 0.006221 | 0.025081 | 2.011452 | 6.51E-06 | 2.08E-05 |
| SNHG3     | 1.706224 | 4.953058 | 1.537512 | 8.35E-20 | 6.23E-18 |
| TNNC1     | 1.655887 | 3.580865 | 1.112704 | 0.011111 | 0.017252 |
| ACTN3     | 0.012706 | 0.053998 | 2.087433 | 1.99E-06 | 7.10E-06 |
| RPL7AP22  | 0.022641 | 0.046306 | 1.032243 | 0.000294 | 0.000646 |
| ARHGEF19  | 0.643265 | 1.323312 | 1.040668 | 2.22E-13 | 3.76E-12 |
| ELOVL4    | 0.070213 | 0.326842 | 2.218793 | 3.23E-08 | 1.70E-07 |
| FAM72B    | 0.09079  | 0.260062 | 1.51826  | 3.16E-19 | 2.16E-17 |
| MT1X      | 130.5439 | 54.50301 | -1.26013 | 0.000521 | 0.001088 |
| MXRA5Y    | 0.007933 | 0.015992 | 1.011424 | 0.011345 | 0.017567 |
| TFAP2C    | 0.138325 | 0.285422 | 1.045036 | 0.012479 | 0.019137 |
| TNIP3     | 0.034218 | 0.068499 | 1.001328 | 5.01E-07 | 2.04E-06 |
| PKIB      | 1.292364 | 3.809961 | 1.559763 | 2.83E-06 | 9.72E-06 |
| LAMA1     | 0.112892 | 0.297078 | 1.395893 | 0.032404 | 0.045265 |
| CENPK     | 0.404706 | 1.001603 | 1.307363 | 2.38E-19 | 1.66E-17 |
| THAP5P1   | 0.038818 | 0.086793 | 1.160851 | 5.46E-07 | 2.20E-06 |
| CD3D      | 3.497994 | 7.182238 | 1.037905 | 1.12E-06 | 4.22E-06 |
| PRAME     | 1.315537 | 4.833198 | 1.877326 | 8.26E-08 | 3.97E-07 |
| CPSF4L    | 0.046112 | 0.111743 | 1.276964 | 0.000107 | 0.000258 |
| TAFA4     | 0.201732 | 0.856195 | 2.0855   | 3.60E-05 | 9.66E-05 |
| RAET1G    | 0.087744 | 0.177354 | 1.01526  | 0.000107 | 0.00026  |
| NKPD1     | 0.021012 | 0.047088 | 1.164167 | 0.000123 | 0.000294 |
| PLA2G1B   | 1.812987 | 3.734645 | 1.042603 | 0.003006 | 0.005329 |
| PLPP4     | 0.185359 | 0.679932 | 1.875067 | 0.008347 | 0.01335  |
| SGO1      | 0.438923 | 1.317729 | 1.586015 | 1.70E-25 | 6.90E-23 |
| WDR38     | 0.015314 | 0.032919 | 1.104051 | 1.47E-06 | 5.37E-06 |
| CENPW     | 4.368883 | 12.65873 | 1.534796 | 8.21E-28 | 1.39E-24 |
| ZNF321P   | 0.163238 | 0.367234 | 1.169727 | 1.81E-14 | 4.01E-13 |
| ZNF681    | 0.140236 | 0.443258 | 1.660288 | 9.21E-19 | 5.57E-17 |
| RBM11     | 0.01099  | 0.068034 | 2.630006 | 0.00389  | 0.006713 |

|           |          |          |          |          |          |
|-----------|----------|----------|----------|----------|----------|
| PDCD1     | 0.799381 | 1.820129 | 1.187085 | 3.45E-06 | 1.16E-05 |
| MAP1A     | 0.236818 | 0.601785 | 1.345468 | 0.004014 | 0.006905 |
| BMP2K-DT  | 0.004492 | 0.00943  | 1.070044 | 1.91E-07 | 8.48E-07 |
| CENPF     | 1.318063 | 3.403989 | 1.368807 | 5.53E-18 | 2.74E-16 |
| LINC01991 | 0.012023 | 0.04092  | 1.76703  | 8.70E-05 | 0.000215 |
| STIL      | 0.400595 | 1.00674  | 1.329475 | 3.96E-22 | 4.85E-20 |
| RN7SL221P | 0.128967 | 0.293852 | 1.188087 | 8.10E-11 | 7.61E-10 |
| LINC02870 | 0.043167 | 0.588567 | 3.769198 | 1.62E-06 | 5.88E-06 |
| LINC00634 | 0.031371 | 0.139112 | 2.148733 | 7.04E-19 | 4.44E-17 |
| G6PD      | 5.464078 | 21.86105 | 2.000313 | 1.91E-22 | 2.48E-20 |
| ACOXL     | 0.016912 | 0.033924 | 1.00429  | 8.89E-09 | 5.27E-08 |
| PNCK      | 0.179317 | 1.717188 | 3.259465 | 1.25E-12 | 1.78E-11 |
| IGFN1     | 0.024146 | 1.206818 | 5.643265 | 0.030634 | 0.04299  |
| PARAL1    | 0.045118 | 0.150925 | 1.742048 | 6.32E-08 | 3.13E-07 |
| OSM       | 0.234363 | 0.519552 | 1.148523 | 7.15E-06 | 2.26E-05 |
| KPNA4P1   | 0.126104 | 0.05783  | -1.12473 | 1.70E-05 | 4.91E-05 |
| UGT3A2    | 0.386006 | 1.453101 | 1.912439 | 0.000418 | 0.000891 |
| MAD2L1    | 0.907544 | 2.242708 | 1.305202 | 3.54E-21 | 3.47E-19 |
| C5orf34   | 0.359549 | 0.817639 | 1.185276 | 6.53E-22 | 7.71E-20 |
| MKI67     | 1.504396 | 4.103124 | 1.447539 | 1.17E-21 | 1.28E-19 |
| LINC02820 | 0.073894 | 0.424772 | 2.523156 | 4.47E-15 | 1.12E-13 |
| YJEFN3    | 0.435924 | 1.010079 | 1.212319 | 5.44E-11 | 5.30E-10 |
| CIP2A     | 0.412782 | 1.287459 | 1.641076 | 5.92E-24 | 1.25E-21 |
| TSSC2     | 0.065472 | 0.161366 | 1.301386 | 8.82E-05 | 0.000217 |
| IGHV3-47  | 0.083643 | 0.293088 | 1.809027 | 1.69E-06 | 6.12E-06 |
| BEST1     | 0.1701   | 0.355575 | 1.063769 | 2.71E-09 | 1.80E-08 |
| CDC25B    | 7.985671 | 18.51437 | 1.21316  | 4.54E-21 | 4.37E-19 |
| CASP5     | 0.043194 | 0.1339   | 1.632238 | 4.27E-09 | 2.71E-08 |
| IL1A      | 0.012843 | 0.037167 | 1.5331   | 1.16E-09 | 8.35E-09 |
| HPDL      | 0.143507 | 0.559504 | 1.963031 | 3.10E-11 | 3.23E-10 |
| CENPI     | 0.304275 | 0.817989 | 1.426707 | 8.66E-22 | 9.99E-20 |
| CD8B      | 0.59773  | 1.422305 | 1.250666 | 0.000226 | 0.000509 |
| RXFP4     | 0.017477 | 0.102646 | 2.55416  | 6.23E-09 | 3.82E-08 |
| HOXB7     | 0.733934 | 1.627265 | 1.148727 | 0.029694 | 0.041792 |
| TPTE2     | 0.006267 | 0.012975 | 1.049939 | 0.000258 | 0.000573 |
| UNC80     | 0.005018 | 0.010867 | 1.114784 | 0.004469 | 0.007608 |
| FFAR3     | 0.013697 | 0.02765  | 1.013385 | 0.000378 | 0.000815 |
| STK33     | 0.051513 | 0.122109 | 1.245149 | 7.54E-07 | 2.94E-06 |
| LYPD8     | 0.313156 | 0.980858 | 1.647161 | 4.09E-08 | 2.11E-07 |
| RPL23AP95 | 0.059417 | 0.135695 | 1.19141  | 1.46E-08 | 8.25E-08 |
| TDRD9     | 0.057179 | 0.379903 | 2.732064 | 3.67E-05 | 9.81E-05 |
| CSAG1     | 1.345017 | 8.056968 | 2.582613 | 6.28E-11 | 6.01E-10 |
| SFRP5     | 4.475942 | 10.58137 | 1.241263 | 0.026885 | 0.038226 |
| ADAM23    | 0.310445 | 0.991254 | 1.674916 | 8.53E-05 | 0.000211 |

|            |          |          |          |          |          |
|------------|----------|----------|----------|----------|----------|
| ENO2       | 0.934741 | 2.310411 | 1.30551  | 3.31E-11 | 3.43E-10 |
| HOXC9      | 0.282814 | 0.710713 | 1.329414 | 8.49E-05 | 0.00021  |
| SOX11      | 0.017219 | 0.047365 | 1.459827 | 7.47E-07 | 2.92E-06 |
| DLX2       | 0.024866 | 0.130889 | 2.396107 | 7.12E-09 | 4.31E-08 |
| NDC80      | 1.33188  | 3.550292 | 1.414474 | 1.30E-22 | 1.83E-20 |
| ETNPPL     | 30.45919 | 12.74562 | -1.25688 | 2.49E-10 | 2.06E-09 |
| F9         | 90.48367 | 43.0822  | -1.07057 | 4.37E-12 | 5.45E-11 |
| GRM6       | 0.011424 | 0.049842 | 2.125276 | 8.62E-05 | 0.000213 |
| SCAT2      | 0.295977 | 0.692905 | 1.227173 | 5.73E-16 | 1.74E-14 |
| PPP1R26P1  | 0.008666 | 0.020423 | 1.236767 | 0.012013 | 0.018486 |
| TRAIP      | 0.667367 | 1.900241 | 1.50963  | 7.68E-29 | 2.23E-25 |
| NLRP7      | 0.009137 | 0.032196 | 1.817065 | 5.09E-05 | 0.000132 |
| LINC02550  | 0.092198 | 0.258372 | 1.486644 | 7.86E-07 | 3.06E-06 |
| PTTG1      | 4.762384 | 13.49539 | 1.502711 | 1.83E-23 | 3.38E-21 |
| GBX2       | 0.01328  | 0.03257  | 1.294326 | 0.000892 | 0.00177  |
| FAM72D     | 0.095258 | 0.284558 | 1.578809 | 1.14E-19 | 8.38E-18 |
| MED28P7    | 0.04637  | 0.133763 | 1.528402 | 6.22E-11 | 5.97E-10 |
| PODNL1     | 0.112066 | 0.231966 | 1.049566 | 0.012712 | 0.01946  |
| PCDHA3     | 0.025389 | 0.05802  | 1.192374 | 0.022401 | 0.032445 |
| KIF25-AS1  | 0.017203 | 0.132154 | 2.941467 | 0.00083  | 0.001657 |
| TNIK       | 0.626541 | 1.264881 | 1.01352  | 9.60E-07 | 3.66E-06 |
| FAM83A-AS1 | 11.69591 | 1.961996 | -2.57561 | 7.73E-08 | 3.75E-07 |
| ZNF702P    | 0.142367 | 0.361603 | 1.344796 | 2.65E-07 | 1.14E-06 |
| SNRK-AS1   | 0.02637  | 0.07128  | 1.434613 | 9.79E-07 | 3.73E-06 |
| ATP8B5P    | 0.037012 | 0.100182 | 1.436583 | 8.24E-05 | 0.000205 |
| CHODL      | 0.204771 | 0.613034 | 1.581956 | 0.00015  | 0.000351 |
| TAGLN3     | 0.008657 | 0.03389  | 1.968904 | 0.002662 | 0.004779 |
| CYCSP10    | 0.091728 | 0.190068 | 1.051083 | 2.39E-08 | 1.29E-07 |
| OR7E126P   | 0.047839 | 0.144445 | 1.594251 | 1.89E-09 | 1.30E-08 |
| GNAS-AS1   | 0.018381 | 0.051382 | 1.483062 | 0.000192 | 0.00044  |
| IGHG3      | 19.99535 | 50.92665 | 1.348756 | 0.010024 | 0.015716 |
| GPR19      | 0.124821 | 0.289565 | 1.214025 | 1.16E-15 | 3.35E-14 |
| CDCA4      | 1.736944 | 3.996923 | 1.202338 | 1.66E-24 | 4.32E-22 |
| HROB       | 0.652836 | 1.617042 | 1.308564 | 9.21E-23 | 1.35E-20 |
| PCAT14     | 0.010841 | 0.068811 | 2.666109 | 0.003562 | 0.006205 |
| ACAN       | 0.092697 | 0.293703 | 1.663756 | 3.61E-09 | 2.33E-08 |
| NAA11      | 0.053227 | 0.760966 | 3.837607 | 1.64E-12 | 2.25E-11 |
| CHI3L2     | 0.138693 | 0.487841 | 1.814515 | 7.33E-05 | 0.000184 |
| NUDT11     | 0.049623 | 0.320054 | 2.689232 | 0.000403 | 0.000862 |
| NLGN4X     | 0.320526 | 0.925747 | 1.530177 | 0.005086 | 0.008526 |
| PHF10P1    | 0.01607  | 0.032199 | 1.002641 | 0.006021 | 0.009929 |
| WDHD1      | 0.448598 | 1.097922 | 1.291281 | 1.09E-21 | 1.22E-19 |
| PRPH2      | 0.063347 | 0.155069 | 1.291567 | 0.004174 | 0.007156 |
| UBE2SP2    | 0.051235 | 0.118934 | 1.214954 | 4.88E-14 | 9.58E-13 |

|             |          |          |          |          |          |
|-------------|----------|----------|----------|----------|----------|
| PPIAP39     | 0.180759 | 0.415015 | 1.199093 | 0.01484  | 0.022383 |
| DES         | 0.438498 | 2.280266 | 2.378561 | 0.024786 | 0.035504 |
| TRPM2-AS    | 0.028546 | 0.072969 | 1.354004 | 0.003135 | 0.005531 |
| LINC00944   | 0.28964  | 0.610932 | 1.076752 | 1.40E-07 | 6.42E-07 |
| HOXA5       | 0.435575 | 1.054226 | 1.27519  | 0.000185 | 0.000425 |
| ZYG11A      | 0.273216 | 0.577404 | 1.079538 | 3.46E-08 | 1.81E-07 |
| DUSP9       | 2.659912 | 19.55008 | 2.877724 | 4.92E-12 | 6.08E-11 |
| LINC01410   | 0.056043 | 0.143825 | 1.3597   | 0.000667 | 0.001361 |
| KIF18A      | 0.316456 | 1.016613 | 1.683695 | 3.15E-23 | 5.25E-21 |
| MAFA-AS1    | 0.845192 | 2.712322 | 1.682178 | 4.92E-06 | 1.61E-05 |
| LINC02899   | 0.154595 | 0.390025 | 1.335073 | 0.001827 | 0.003399 |
| KBTBD11-AS1 | 0.264773 | 0.108983 | -1.28065 | 1.36E-07 | 6.24E-07 |
| RPL7P38     | 0.01509  | 0.033386 | 1.145668 | 0.002124 | 0.003889 |
| TYRP1       | 0.095138 | 0.445326 | 2.226773 | 0.000108 | 0.000262 |
| ABCB5       | 0.035107 | 0.330039 | 3.232815 | 4.29E-06 | 1.42E-05 |
| ACNATP      | 0.742412 | 0.362602 | -1.03383 | 1.04E-09 | 7.59E-09 |
| A4GNT       | 0.180057 | 0.493039 | 1.453248 | 6.61E-06 | 2.11E-05 |
| KCNC1       | 0.018218 | 0.05652  | 1.633422 | 0.000242 | 0.000542 |
| NDP         | 0.017037 | 0.050407 | 1.564966 | 3.63E-05 | 9.71E-05 |
| FAM182B     | 0.037891 | 0.123088 | 1.699757 | 8.14E-15 | 1.93E-13 |
| ARMCX1      | 1.037261 | 2.361881 | 1.187158 | 4.67E-06 | 1.53E-05 |
| LHFPL3      | 0.025058 | 0.216097 | 3.108362 | 1.37E-13 | 2.43E-12 |
| LINC00665   | 0.720048 | 2.094303 | 1.540304 | 1.21E-12 | 1.73E-11 |
| SP8         | 0.060784 | 0.270056 | 2.151503 | 7.38E-08 | 3.59E-07 |
| RN7SL8P     | 0.114213 | 0.65369  | 2.516884 | 2.36E-13 | 3.96E-12 |
| ADAMTS14    | 0.158184 | 0.38854  | 1.296456 | 4.47E-07 | 1.83E-06 |
| MMP14       | 15.12166 | 31.29577 | 1.049351 | 6.07E-09 | 3.73E-08 |
| L1TD1       | 0.009844 | 0.056771 | 2.527829 | 0.003361 | 0.005888 |
| TWIST1      | 0.112322 | 0.850433 | 2.920562 | 2.26E-06 | 7.95E-06 |
| TFAP2E      | 0.132796 | 0.300084 | 1.176155 | 1.36E-11 | 1.53E-10 |
| RPRM        | 0.014813 | 0.116559 | 2.976148 | 1.02E-10 | 9.33E-10 |
| NAP1L6P     | 0.062957 | 0.275128 | 2.12766  | 2.90E-09 | 1.91E-08 |
| PTK7        | 1.133618 | 2.564457 | 1.177718 | 1.03E-05 | 3.13E-05 |
| FAR2P4      | 0.017866 | 0.135968 | 2.928004 | 1.19E-11 | 1.35E-10 |
| PHEX        | 0.069388 | 0.270533 | 1.963038 | 3.89E-07 | 1.62E-06 |
| ZFP69B      | 0.270885 | 0.546557 | 1.012693 | 4.97E-20 | 3.81E-18 |
| NKX3-2      | 0.02974  | 0.161362 | 2.439802 | 6.93E-13 | 1.05E-11 |
| CKS2        | 18.91227 | 42.63503 | 1.172717 | 9.81E-21 | 8.59E-19 |
| ENPP6       | 0.16946  | 0.469435 | 1.469982 | 1.44E-05 | 4.25E-05 |
| ICAM5       | 0.08836  | 0.221763 | 1.327553 | 0.000205 | 0.000468 |
| ELOVL3      | 0.098647 | 0.421543 | 2.095334 | 8.59E-11 | 8.01E-10 |
| RECQL4      | 3.330542 | 7.37539  | 1.146962 | 4.29E-17 | 1.68E-15 |
| IGHV3-79    | 0.047738 | 0.449786 | 3.236026 | 1.48E-05 | 4.35E-05 |
| KASH5       | 0.03373  | 0.100024 | 1.568228 | 2.22E-05 | 6.26E-05 |



|             |          |          |          |          |          |
|-------------|----------|----------|----------|----------|----------|
| GXYLT2      | 0.237623 | 0.597281 | 1.329732 | 0.000151 | 0.000353 |
| HAS2-AS1    | 0.029009 | 0.08273  | 1.511915 | 0.000521 | 0.001087 |
| FSCN1       | 6.967716 | 14.13332 | 1.020343 | 0.001345 | 0.002576 |
| DUSP15      | 0.105663 | 0.425103 | 2.008344 | 6.24E-08 | 3.09E-07 |
| KIF4A       | 1.357063 | 4.266962 | 1.652722 | 1.35E-23 | 2.64E-21 |
| CLEC2L      | 0.043147 | 0.978782 | 4.503668 | 5.87E-16 | 1.78E-14 |
| PTPRG-AS1   | 0.036986 | 0.089843 | 1.280408 | 2.61E-06 | 9.07E-06 |
| E2F7        | 0.206919 | 0.502393 | 1.279747 | 8.87E-16 | 2.62E-14 |
| CRLF1       | 0.385878 | 1.598522 | 2.050523 | 0.000141 | 0.000332 |
| RPS12P31    | 0.035601 | 0.075118 | 1.077223 | 3.53E-06 | 1.19E-05 |
| CPNE4       | 0.009221 | 0.025601 | 1.473223 | 2.72E-06 | 9.40E-06 |
| KIF23       | 0.584155 | 1.812931 | 1.633902 | 1.32E-23 | 2.61E-21 |
| UNC13C      | 0.001733 | 0.009882 | 2.51178  | 0.000285 | 0.000629 |
| CDK1        | 2.243423 | 6.38669  | 1.509366 | 1.01E-23 | 2.00E-21 |
| ZNF724      | 0.085082 | 0.184837 | 1.119327 | 2.51E-12 | 3.31E-11 |
| BUB1        | 0.803456 | 2.235443 | 1.47627  | 1.61E-22 | 2.16E-20 |
| SLCO4A1-AS1 | 0.165454 | 0.369984 | 1.161032 | 0.027772 | 0.039352 |
| DCAF8L2     | 0.088865 | 0.187201 | 1.074904 | 8.44E-08 | 4.05E-07 |
| CIT         | 0.389863 | 0.874192 | 1.164981 | 3.24E-17 | 1.32E-15 |
| NAV2-AS3    | 0.035356 | 0.090953 | 1.363172 | 1.64E-05 | 4.77E-05 |
| HASPIN      | 0.190114 | 0.474349 | 1.319079 | 7.89E-18 | 3.74E-16 |
| GPM6B       | 0.082782 | 0.208877 | 1.335264 | 1.04E-06 | 3.93E-06 |
| KRT15       | 0.052095 | 0.122743 | 1.236416 | 0.00257  | 0.004627 |
| CXCL1       | 5.114859 | 12.55405 | 1.295386 | 0.000186 | 0.000428 |
| GBP5        | 1.269765 | 2.629034 | 1.049971 | 0.001227 | 0.00237  |
| REG4        | 0.076857 | 0.622895 | 3.018735 | 0.020178 | 0.029517 |
| DSG1        | 2.255517 | 1.074491 | -1.06981 | 5.49E-09 | 3.41E-08 |
| ALDOAP2     | 0.010077 | 0.023772 | 1.238121 | 9.76E-08 | 4.61E-07 |
| FCGR1A      | 0.358768 | 0.910377 | 1.343411 | 1.40E-06 | 5.15E-06 |
| SGCG        | 0.00684  | 0.059587 | 3.122911 | 6.99E-06 | 2.21E-05 |
| ZNF365      | 0.012116 | 0.029261 | 1.272022 | 0.000911 | 0.001804 |
| PTGES3L     | 0.041252 | 0.141037 | 1.773547 | 4.43E-15 | 1.11E-13 |
| CCR5AS      | 0.18678  | 0.400748 | 1.101357 | 1.63E-05 | 4.73E-05 |
| LINC01589   | 0.177038 | 0.901224 | 2.347827 | 9.31E-08 | 4.42E-07 |
| XCL1        | 0.300173 | 0.992222 | 1.72487  | 5.72E-12 | 6.98E-11 |
| TLX2        | 0.02766  | 0.069932 | 1.338168 | 0.003394 | 0.00594  |
| MAP7D2      | 0.591531 | 1.28008  | 1.113707 | 6.51E-05 | 0.000166 |
| KCNB1       | 1.155758 | 0.536458 | -1.1073  | 7.95E-08 | 3.84E-07 |
| RRM2        | 3.770856 | 8.919623 | 1.242091 | 1.01E-21 | 1.14E-19 |
| CENPA       | 0.851311 | 2.801207 | 1.71829  | 7.72E-26 | 3.48E-23 |
| DPEP1       | 0.619719 | 1.282341 | 1.049094 | 0.034367 | 0.047737 |
| ZNF208      | 0.02539  | 0.135271 | 2.413549 | 5.19E-07 | 2.10E-06 |
| DLGAP1      | 0.022726 | 0.057861 | 1.34823  | 0.000113 | 0.000272 |
| SLC22A20P   | 0.049512 | 0.102898 | 1.055367 | 1.48E-07 | 6.74E-07 |

|             |          |          |          |          |          |
|-------------|----------|----------|----------|----------|----------|
| LINC01667   | 0.134074 | 1.247984 | 3.218504 | 1.18E-11 | 1.33E-10 |
| PRSS30P     | 0.061451 | 0.142991 | 1.218417 | 2.75E-05 | 7.58E-05 |
| AURKAP1     | 0.016267 | 0.041602 | 1.354711 | 1.87E-07 | 8.33E-07 |
| RNU4ATAC    | 0.231818 | 0.579506 | 1.321827 | 8.91E-06 | 2.75E-05 |
| IGDCC4      | 0.116552 | 0.302289 | 1.374954 | 3.09E-07 | 1.31E-06 |
| ANKRD18B    | 0.021248 | 0.055896 | 1.395443 | 2.83E-06 | 9.72E-06 |
| SLC13A5     | 36.62062 | 18.29658 | -1.00108 | 2.58E-13 | 4.29E-12 |
| LINC01366   | 0.018764 | 0.045947 | 1.292009 | 0.000125 | 0.000298 |
| NDN         | 2.235526 | 7.288791 | 1.705065 | 0.000112 | 0.00027  |
| LINC01595   | 8.934277 | 3.877024 | -1.2044  | 1.37E-06 | 5.06E-06 |
| DENND5B-AS1 | 0.021444 | 0.048589 | 1.180042 | 5.89E-10 | 4.52E-09 |
| LRP4        | 0.286906 | 0.747457 | 1.381414 | 2.56E-07 | 1.11E-06 |
| LINC01711   | 0.025025 | 0.09672  | 1.950435 | 0.000449 | 0.00095  |
| DRD1        | 0.442787 | 0.188357 | -1.23315 | 1.20E-07 | 5.57E-07 |
| SMPDL3B     | 0.448931 | 1.103768 | 1.297871 | 5.39E-11 | 5.26E-10 |
| ZNF525      | 0.325165 | 0.658879 | 1.018841 | 2.03E-12 | 2.72E-11 |
| PKD1L2      | 0.072516 | 0.220852 | 1.60671  | 0.001681 | 0.003157 |
| CIB2        | 0.826666 | 2.117845 | 1.35722  | 5.76E-12 | 7.01E-11 |
| GRIK1       | 0.033839 | 0.104788 | 1.630725 | 1.70E-07 | 7.66E-07 |
| PTGFR       | 1.065057 | 2.485194 | 1.222427 | 0.003726 | 0.006461 |
| FCGR2C      | 0.250429 | 0.671724 | 1.423468 | 6.96E-06 | 2.20E-05 |
| MT3         | 0.335528 | 0.684731 | 1.029104 | 0.000255 | 0.000568 |
| MCRIP2P1    | 0.062882 | 0.129171 | 1.038552 | 7.56E-07 | 2.95E-06 |
| ADAMTS3     | 0.062186 | 0.177729 | 1.515015 | 0.000193 | 0.000443 |
| ASCL2       | 0.248945 | 0.652746 | 1.390695 | 2.83E-06 | 9.72E-06 |
| GAREM2      | 0.316299 | 0.681354 | 1.107115 | 1.40E-10 | 1.24E-09 |
| LINC02109   | 0.025185 | 0.138705 | 2.461395 | 6.56E-11 | 6.25E-10 |
| RBMXP1      | 0.038435 | 0.107526 | 1.484191 | 0.002089 | 0.003835 |
| MIR663AHG   | 0.009209 | 0.138423 | 3.909828 | 6.32E-13 | 9.67E-12 |
| ANXA8L1     | 0.025287 | 0.147787 | 2.547028 | 0.016472 | 0.024605 |
| SLC7A8      | 0.767427 | 1.699268 | 1.146811 | 0.000302 | 0.000661 |
| CALN1       | 0.00481  | 0.028792 | 2.581629 | 2.05E-05 | 5.81E-05 |
| LRP2        | 0.058831 | 0.318466 | 2.436502 | 0.000151 | 0.000355 |
| SFN         | 15.13402 | 36.10703 | 1.254484 | 1.78E-06 | 6.42E-06 |
| RAB42       | 0.416868 | 1.168199 | 1.486625 | 1.53E-15 | 4.27E-14 |
| HORMAD1     | 0.031123 | 0.075982 | 1.287685 | 0.019718 | 0.028918 |
| GCNT1       | 0.246695 | 0.768387 | 1.639102 | 4.08E-05 | 0.000108 |
| EEF1DP3     | 0.018824 | 0.045133 | 1.261602 | 6.00E-07 | 2.39E-06 |
| H1-5        | 0.079159 | 0.167411 | 1.080576 | 1.85E-10 | 1.60E-09 |
| FHOD3       | 0.176426 | 0.617431 | 1.807218 | 5.55E-09 | 3.44E-08 |
| LDOC1       | 2.69741  | 7.089198 | 1.394048 | 0.015641 | 0.023472 |
| LINC01775   | 0.064629 | 0.144636 | 1.162178 | 4.02E-09 | 2.56E-08 |
| ZNF287      | 0.145508 | 0.319766 | 1.135924 | 3.11E-08 | 1.64E-07 |
| HMGB1P3     | 0.042678 | 0.10302  | 1.271359 | 2.78E-05 | 7.65E-05 |

|            |          |          |          |          |          |
|------------|----------|----------|----------|----------|----------|
| TMC2       | 0.008773 | 0.027097 | 1.626951 | 1.87E-07 | 8.33E-07 |
| SLC22A16   | 0.011833 | 0.025696 | 1.11874  | 0.000187 | 0.000429 |
| TUBB3      | 0.06734  | 0.154025 | 1.19364  | 0.000231 | 0.000519 |
| SMIM43     | 0.017861 | 0.142746 | 2.998537 | 3.31E-09 | 2.16E-08 |
| FUNDC2P2   | 0.10639  | 0.343556 | 1.691187 | 0.000524 | 0.001093 |
| TMEM243    | 0.964066 | 2.004227 | 1.055842 | 6.27E-13 | 9.61E-12 |
| ICOS       | 0.187029 | 0.384503 | 1.039735 | 6.22E-06 | 1.99E-05 |
| HAPLN1     | 0.03273  | 0.25893  | 2.983891 | 1.56E-08 | 8.78E-08 |
| HAPLN3     | 0.699792 | 1.417929 | 1.018788 | 1.58E-05 | 4.60E-05 |
| RDH16      | 58.19368 | 28.32587 | -1.03874 | 1.74E-08 | 9.71E-08 |
| RGS13      | 0.017533 | 0.104368 | 2.573533 | 3.97E-08 | 2.05E-07 |
| GABRG3     | 0.017258 | 0.041343 | 1.260398 | 0.004135 | 0.007095 |
| POPODC3    | 0.189986 | 1.136637 | 2.580808 | 4.03E-09 | 2.57E-08 |
| FAM153CP   | 0.007745 | 0.023519 | 1.602421 | 0.002556 | 0.004604 |
| RPL10L     | 0.130236 | 0.792825 | 2.605876 | 4.33E-10 | 3.41E-09 |
| COL24A1    | 0.042816 | 0.237334 | 2.47071  | 5.44E-11 | 5.30E-10 |
| TPBG       | 0.318876 | 0.706529 | 1.147753 | 3.75E-05 | 0.0001   |
| DCHS2      | 0.007179 | 0.023333 | 1.700474 | 3.00E-05 | 8.19E-05 |
| CYP2E1     | 363.922  | 164.3708 | -1.14668 | 9.94E-06 | 3.04E-05 |
| LINC02506  | 1.058587 | 3.487729 | 1.720149 | 1.47E-07 | 6.70E-07 |
| FOXD2      | 0.383925 | 0.78455  | 1.031043 | 1.41E-09 | 1.00E-08 |
| KCTD17     | 3.017533 | 7.014195 | 1.216908 | 1.12E-13 | 2.04E-12 |
| MROH7-TTC4 | 0.002752 | 0.005522 | 1.004926 | 0.001263 | 0.002433 |
| ST6GALNAC5 | 0.029554 | 0.171336 | 2.535385 | 2.27E-15 | 6.08E-14 |
| CCR10      | 0.149253 | 0.29937  | 1.004173 | 1.39E-12 | 1.95E-11 |
| CYP2A13    | 3.433299 | 1.202794 | -1.51321 | 0.000603 | 0.001242 |
| ANKRD18CP  | 0.0174   | 0.042131 | 1.275818 | 7.64E-06 | 2.40E-05 |
| ARL4AP5    | 0.016529 | 0.04147  | 1.327082 | 4.95E-07 | 2.01E-06 |
| ADAM12     | 0.256054 | 0.533818 | 1.0599   | 2.57E-06 | 8.94E-06 |
| SPDEF      | 0.824619 | 2.091929 | 1.343034 | 4.93E-05 | 0.000129 |
| BSG-AS1    | 0.891518 | 1.936241 | 1.118922 | 4.89E-12 | 6.05E-11 |
| GAP43      | 0.063182 | 0.238845 | 1.9185   | 5.78E-08 | 2.88E-07 |
| HOXA11     | 0.049851 | 0.275893 | 2.468412 | 3.02E-08 | 1.60E-07 |
| LINC01929  | 0.051245 | 0.20157  | 1.975813 | 0.000307 | 0.000673 |
| ABHD17AP4  | 0.015507 | 0.049813 | 1.683607 | 0.00696  | 0.011312 |
| DLGAP2     | 0.021673 | 0.007969 | -1.44338 | 0.034656 | 0.04808  |
| AIM2       | 0.187348 | 0.575955 | 1.620236 | 7.98E-05 | 0.000199 |
| HOXD-AS2   | 0.110034 | 0.250664 | 1.187802 | 0.014924 | 0.022496 |
| GPR89P     | 0.012892 | 0.057029 | 2.145205 | 1.27E-08 | 7.27E-08 |
| CYP2C8     | 135.3875 | 66.22639 | -1.03162 | 3.90E-09 | 2.50E-08 |
| LDC1P      | 0.036469 | 0.073448 | 1.010046 | 0.000535 | 0.001114 |
| TRPM2      | 0.466929 | 0.941539 | 1.011816 | 1.89E-07 | 8.42E-07 |
| ERICH4     | 0.048324 | 0.235176 | 2.282921 | 1.27E-05 | 3.80E-05 |
| LHX2       | 0.236299 | 0.733617 | 1.634412 | 0.000527 | 0.001098 |

|           |          |          |          |          |          |
|-----------|----------|----------|----------|----------|----------|
| SLC6A2    | 2.667405 | 1.117976 | -1.25455 | 0.011595 | 0.017905 |
| PITX1     | 0.829373 | 2.677064 | 1.690558 | 1.03E-06 | 3.89E-06 |
| AGPAT4    | 0.326524 | 0.818053 | 1.325003 | 6.98E-13 | 1.06E-11 |
| SLC30A3   | 0.214118 | 0.562853 | 1.394353 | 0.003149 | 0.005555 |
| LINC02377 | 0.174976 | 0.608478 | 1.798045 | 1.68E-08 | 9.39E-08 |
| MIR646HG  | 0.051784 | 0.109991 | 1.086821 | 5.07E-05 | 0.000132 |
| ANO4      | 0.049353 | 0.128071 | 1.375736 | 0.000231 | 0.00052  |
| MCM4      | 4.839172 | 10.40528 | 1.104484 | 2.13E-18 | 1.15E-16 |
| PLK4      | 0.380729 | 1.007554 | 1.404021 | 1.96E-22 | 2.54E-20 |
| MUC12-AS1 | 0.171101 | 1.082816 | 2.661866 | 1.97E-05 | 5.62E-05 |
| TBX3-AS1  | 1.120349 | 0.548353 | -1.03077 | 8.57E-06 | 2.66E-05 |
| UGT1A2P   | 4.212259 | 1.506999 | -1.48292 | 3.64E-08 | 1.89E-07 |
| AXDND1    | 0.021861 | 0.061037 | 1.481289 | 3.75E-05 | 0.0001   |
| POU4F1    | 0.008801 | 0.034751 | 1.981276 | 0.000958 | 0.001889 |
| MGAM2     | 0.093542 | 0.527389 | 2.49518  | 2.63E-07 | 1.13E-06 |
| NCAPD2    | 3.079216 | 7.045631 | 1.194166 | 2.08E-21 | 2.15E-19 |
| SCG3      | 0.033789 | 0.187549 | 2.472628 | 9.14E-07 | 3.50E-06 |
| GABRA3    | 0.044869 | 0.495864 | 3.466168 | 2.75E-17 | 1.14E-15 |
| FANCB     | 0.084215 | 0.236456 | 1.48943  | 1.77E-22 | 2.35E-20 |
| CCIN      | 0.019225 | 0.039672 | 1.04515  | 0.004059 | 0.006975 |
| NT5DC2    | 2.958429 | 9.587597 | 1.696338 | 2.55E-17 | 1.08E-15 |

---

**Table S6** Co-expression miRNA of P3H1 obtained using starBase

| miRNAname       | Gene Name | clipExp Num | PITA | RNA22 | miRmap | microT | miRanda | PicTar | Target Scan | Pancancer Num |
|-----------------|-----------|-------------|------|-------|--------|--------|---------|--------|-------------|---------------|
| hsa-miR-29a-3p  | P3H1      | 13          | 1    | 0     | 1      | 1      | 1       | 0      | 1           | 20            |
| hsa-miR-29b-3p  | P3H1      | 13          | 1    | 0     | 1      | 1      | 1       | 0      | 1           | 23            |
| hsa-miR-29c-3p  | P3H1      | 13          | 1    | 0     | 1      | 1      | 1       | 0      | 1           | 26            |
| hsa-miR-362-5p  | P3H1      | 1           | 1    | 0     | 0      | 0      | 0       | 0      | 1           | 11            |
| hsa-miR-370-3p  | P3H1      | 2           | 1    | 0     | 0      | 1      | 0       | 0      | 0           | 1             |
| hsa-miR-335-5p  | P3H1      | 13          | 1    | 0     | 0      | 0      | 1       | 0      | 0           | 9             |
| hsa-miR-588     | P3H1      | 1           | 1    | 1     | 0      | 0      | 0       | 0      | 0           | 0             |
| hsa-miR-500b-5p | P3H1      | 2           | 0    | 0     | 0      | 1      | 0       | 1      | 1           | 4             |
| hsa-miR-378g    | P3H1      | 2           | 0    | 1     | 1      | 1      | 0       | 0      | 0           | 4             |
| hsa-miR-378g    | P3H1      | 2           | 0    | 0     | 1      | 1      | 0       | 0      | 0           | 4             |
| hsa-miR-378g    | P3H1      | 2           | 0    | 0     | 1      | 1      | 0       | 0      | 0           | 4             |
| hsa-miR-1343-3p | P3H1      | 2           | 0    | 0     | 1      | 0      | 0       | 1      | 0           | 2             |

**Table S7** Co-expression lincRNA of hsa-miR-29c-3p obtained using starBase

| miRNAname      | geneName     | geneType             | clipExpNum | pancancerNum |
|----------------|--------------|----------------------|------------|--------------|
| hsa-miR-29c-3p | AL139287.1   | sense_intronic       | 1          | 4            |
| hsa-miR-29c-3p | AL391244.1   | processed_transcript | 7          | 5            |
| hsa-miR-29c-3p | AL031282.2   | processed_transcript | 1          | 2            |
| hsa-miR-29c-3p | AL513327.3   | lincRNA              | 1          | 4            |
| hsa-miR-29c-3p | AL138787.2   | antisense            | 1          | 3            |
| hsa-miR-29c-3p | AL138787.2   | antisense            | 1          | 3            |
| hsa-miR-29c-3p | AL603840.1   | lincRNA              | 1          | 4            |
| hsa-miR-29c-3p | AL355488.1   | antisense            | 8          | 7            |
| hsa-miR-29c-3p | AL365361.1   | lincRNA              | 1          | 0            |
| hsa-miR-29c-3p | RP11-435B5.4 | lincRNA              | 1          | 0            |
| hsa-miR-29c-3p | GAS5         | processed_transcript | 4          | 5            |
| hsa-miR-29c-3p | GAS5         | processed_transcript | 4          | 5            |
| hsa-miR-29c-3p | GAS5         | processed_transcript | 4          | 5            |
| hsa-miR-29c-3p | MIR29B2CHG   | lincRNA              | 1          | 0            |
| hsa-miR-29c-3p | AC098828.2   | lincRNA              | 1          | 12           |
| hsa-miR-29c-3p | DNAJC27-AS1  | antisense            | 1          | 3            |
| hsa-miR-29c-3p | AC132154.1   | TEC                  | 1          | 3            |
| hsa-miR-29c-3p | PCBP1-AS1    | processed_transcript | 1          | 2            |
| hsa-miR-29c-3p | AC010894.2   | lincRNA              | 1          | 6            |
| hsa-miR-29c-3p | AC016717.2   | lincRNA              | 4          | 3            |
| hsa-miR-29c-3p | LINC01907    | lincRNA              | 1          | 3            |
| hsa-miR-29c-3p | THUMPD3-AS1  | antisense            | 3          | 7            |
| hsa-miR-29c-3p | LINC00852    | antisense            | 3          | 4            |
| hsa-miR-29c-3p | LINC00879    | lincRNA              | 1          | 4            |
| hsa-miR-29c-3p | NOP14-AS1    | antisense            | 1          | 7            |
| hsa-miR-29c-3p | MIR4458HG    | lincRNA              | 6          | 0            |
| hsa-miR-29c-3p | LIFR-AS1     | antisense            | 1          | 2            |
| hsa-miR-29c-3p | HCG18        | antisense            | 2          | 9            |
| hsa-miR-29c-3p | HCP5         | sense_overlapping    | 3          | 1            |
| hsa-miR-29c-3p | AFDN-DT      | lincRNA              | 2          | 9            |
| hsa-miR-29c-3p | AC091729.3   | antisense            | 1          | 6            |
| hsa-miR-29c-3p | AC019117.2   | lincRNA              | 1          | 4            |
| hsa-miR-29c-3p | HOXA-AS3     | antisense            | 1          | 8            |
| hsa-miR-29c-3p | HOXA10-AS    | antisense            | 2          | 9            |
| hsa-miR-29c-3p | AC007036.3   | sense_overlapping    | 9          | 0            |
| hsa-miR-29c-3p | AC005154.1   | processed_transcript | 3          | 5            |
| hsa-miR-29c-3p | AC005154.1   | processed_transcript | 4          | 5            |
| hsa-miR-29c-3p | AC005154.1   | processed_transcript | 2          | 5            |
| hsa-miR-29c-3p | AC018647.2   | antisense            | 1          | 5            |
| hsa-miR-29c-3p | SNHG15       | lincRNA              | 1          | 7            |
| hsa-miR-29c-3p | AC073335.2   | lincRNA              | 1          | 2            |

|                |                        |                      |    |    |
|----------------|------------------------|----------------------|----|----|
| hsa-miR-29c-3p | STAG3L5P-PVRIG2P-PILRB | processed_transcript | 4  | 3  |
| hsa-miR-29c-3p | LINC00689              | processed_transcript | 1  | 6  |
| hsa-miR-29c-3p | AC104964.4             | lincRNA              | 1  | 3  |
| hsa-miR-29c-3p | AC091182.1             | processed_transcript | 1  | 5  |
| hsa-miR-29c-3p | AC083837.1             | lincRNA              | 1  | 1  |
| hsa-miR-29c-3p | AC083837.1             | lincRNA              | 1  | 1  |
| hsa-miR-29c-3p | AC090579.1             | antisense            | 1  | 2  |
| hsa-miR-29c-3p | PVT1                   | lincRNA              | 2  | 8  |
| hsa-miR-29c-3p | AC105219.1             | sense_intronic       | 1  | 5  |
| hsa-miR-29c-3p | AC084125.2             | processed_transcript | 1  | 4  |
| hsa-miR-29c-3p | EBLN3P                 | lincRNA              | 4  | 4  |
| hsa-miR-29c-3p | AL590705.5             | processed_transcript | 1  | 2  |
| hsa-miR-29c-3p | ARRDC1-AS1             | antisense            | 2  | 4  |
| hsa-miR-29c-3p | AL157392.3             | processed_transcript | 1  | 4  |
| hsa-miR-29c-3p | AL158835.1             | lincRNA              | 1  | 2  |
| hsa-miR-29c-3p | H19                    | processed_transcript | 13 | 12 |
| hsa-miR-29c-3p | KCNQ1OT1               | antisense            | 1  | 7  |
| hsa-miR-29c-3p | KCNQ1OT1               | antisense            | 1  | 7  |
| hsa-miR-29c-3p | KCNQ1OT1               | antisense            | 2  | 7  |
| hsa-miR-29c-3p | KCNQ1OT1               | antisense            | 2  | 7  |
| hsa-miR-29c-3p | AL137804.1             | antisense            | 1  | 5  |
| hsa-miR-29c-3p | NEAT1                  | lincRNA              | 14 | 1  |
| hsa-miR-29c-3p | NEAT1                  | lincRNA              | 9  | 1  |
| hsa-miR-29c-3p | NEAT1                  | lincRNA              | 9  | 1  |
| hsa-miR-29c-3p | NEAT1                  | lincRNA              | 10 | 1  |
| hsa-miR-29c-3p | NEAT1                  | lincRNA              | 12 | 1  |
| hsa-miR-29c-3p | NEAT1                  | lincRNA              | 8  | 1  |
| hsa-miR-29c-3p | SSSCA1-AS1             | processed_transcript | 2  | 3  |
| hsa-miR-29c-3p | AP003555.1             | lincRNA              | 1  | 2  |
| hsa-miR-29c-3p | AP000873.2             | processed_transcript | 1  | 3  |
| hsa-miR-29c-3p | AP001273.1             | TEC                  | 1  | 4  |
| hsa-miR-29c-3p | AP003025.1             | antisense            | 1  | 5  |
| hsa-miR-29c-3p | MIR4697HG              | TEC                  | 4  | 3  |
| hsa-miR-29c-3p | AC092747.4             | lincRNA              | 3  | 2  |
| hsa-miR-29c-3p | AC144548.1             | processed_transcript | 2  | 5  |
| hsa-miR-29c-3p | LINC00943              | lincRNA              | 1  | 2  |
| hsa-miR-29c-3p | AL355001.2             | lincRNA              | 2  | 6  |
| hsa-miR-29c-3p | AL135999.1             | antisense            | 3  | 2  |
| hsa-miR-29c-3p | AL137129.1             | processed_transcript | 11 | 4  |
| hsa-miR-29c-3p | VASH1-AS1              | lincRNA              | 2  | 4  |
| hsa-miR-29c-3p | LINC00638              | lincRNA              | 1  | 10 |
| hsa-miR-29c-3p | FAM30A                 | lincRNA              | 1  | 2  |
| hsa-miR-29c-3p | RAD51-AS1              | processed_transcript | 1  | 3  |

|                |               |                                |    |    |
|----------------|---------------|--------------------------------|----|----|
| hsa-miR-29c-3p | OIP5-AS1      | processed_transcript           | 7  | 3  |
| hsa-miR-29c-3p | DNAAF4-CCPG1  | processed_transcript           | 3  | 0  |
| hsa-miR-29c-3p | NPTN-IT1      | sense_intronic                 | 1  | 2  |
| hsa-miR-29c-3p | NPTN-IT1      | sense_intronic                 | 1  | 2  |
| hsa-miR-29c-3p | LINC01578     | processed_transcript           | 1  | 5  |
| hsa-miR-29c-3p | AC022167.2    | antisense                      | 1  | 3  |
| hsa-miR-29c-3p | MIR193BHG     | lincRNA                        | 1  | 9  |
| hsa-miR-29c-3p | AC120114.4    | TEC                            | 1  | 3  |
| hsa-miR-29c-3p | MIR762HG      | antisense                      | 1  | 3  |
| hsa-miR-29c-3p | CRNDE         | lincRNA                        | 1  | 9  |
| hsa-miR-29c-3p | AC040162.3    | lincRNA                        | 3  | 2  |
| hsa-miR-29c-3p | AC020978.7    | sense_overlapping              | 2  | 2  |
| hsa-miR-29c-3p | AC092384.3    | sense_intronic                 | 1  | 3  |
| hsa-miR-29c-3p | AC012146.1    | processed_transcript           | 5  | 8  |
| hsa-miR-29c-3p | MIR497HG      | antisense                      | 5  | 1  |
| hsa-miR-29c-3p | AC087501.4    | sense_intronic                 | 1  | 5  |
| hsa-miR-29c-3p | CCDC144NL-AS1 | antisense                      | 1  | 6  |
| hsa-miR-29c-3p | AC005899.4    | processed_transcript           | 1  | 2  |
| hsa-miR-29c-3p | AC018521.1    | processed_transcript           | 7  | 1  |
| hsa-miR-29c-3p | AC018628.1    | TEC                            | 3  | 4  |
| hsa-miR-29c-3p | AC005332.7    | lincRNA                        | 4  | 5  |
| hsa-miR-29c-3p | LINC00511     | lincRNA                        | 1  | 19 |
| hsa-miR-29c-3p | SNHG20        | processed_transcript           | 1  | 5  |
| hsa-miR-29c-3p | AC114271.1    | antisense                      | 3  | 4  |
| hsa-miR-29c-3p | AC092329.4    | processed_transcript           | 1  | 0  |
| hsa-miR-29c-3p | LINC01224     | lincRNA                        | 1  | 5  |
| hsa-miR-29c-3p | AC002116.1    | processed_transcript           | 1  | 3  |
| hsa-miR-29c-3p | AC016590.3    | antisense                      | 1  | 3  |
| hsa-miR-29c-3p | CTD-2337J16.1 | lincRNA                        | 1  | 0  |
| hsa-miR-29c-3p | SNHG17        | processed_transcript           | 1  | 15 |
| hsa-miR-29c-3p | LINC01270     | lincRNA                        | 1  | 10 |
| hsa-miR-29c-3p | MIR646HG      | lincRNA                        | 1  | 3  |
| hsa-miR-29c-3p | AL121832.3    | sense_intronic                 | 1  | 5  |
| hsa-miR-29c-3p | AL117379.1    | lincRNA                        | 1  | 4  |
| hsa-miR-29c-3p | AP001432.1    | lincRNA                        | 5  | 4  |
| hsa-miR-29c-3p | AJ239328.1    | sense_overlapping              | 1  | 3  |
| hsa-miR-29c-3p | DUXAP8        | processed_transcript           | 1  | 12 |
| hsa-miR-29c-3p | DUXAP8        | processed_transcript           | 3  | 12 |
| hsa-miR-29c-3p | MIAT          | lincRNA                        | 1  | 2  |
| hsa-miR-29c-3p | MIAT          | lincRNA                        | 1  | 2  |
| hsa-miR-29c-3p | TUG1          | bidirectional_promoter_lincRNA | 14 | 10 |
| hsa-miR-29c-3p | TUG1          | bidirectional_promoter_lincRNA | 7  | 10 |
| hsa-miR-29c-3p | LINC01521     | lincRNA                        | 2  | 13 |
| hsa-miR-29c-3p | AL031587.5    | TEC                            | 2  | 10 |



|                |            |         |    |   |
|----------------|------------|---------|----|---|
| hsa-miR-29c-3p | MIRLET7BHG | lincRNA | 13 | 3 |
| hsa-miR-29c-3p | AL117329.1 | lincRNA | 1  | 8 |
| hsa-miR-29c-3p | BX890604.1 | lincRNA | 1  | 8 |
| hsa-miR-29c-3p | XIST       | lincRNA | 8  | 1 |

---
